# Supplementary material for: Oxygen Isotope Variability within Nautilus Shell Growth Bands
Source: PubMed Central journal article supplement (PMC4839723; doi:10.1371/journal.pone.0153890), 2016-04-21

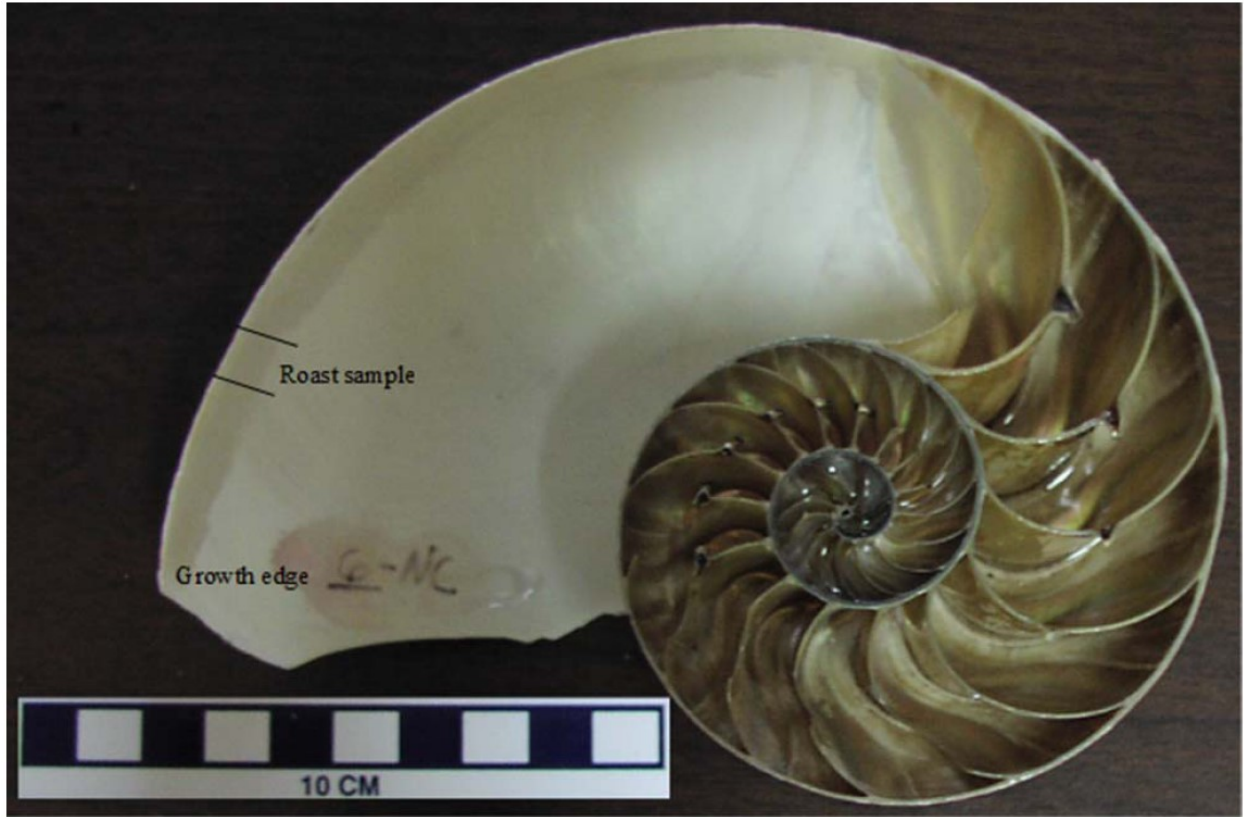

Image indicating where the roasted sample of the wild-caught Nautilus macromphalus was removed.

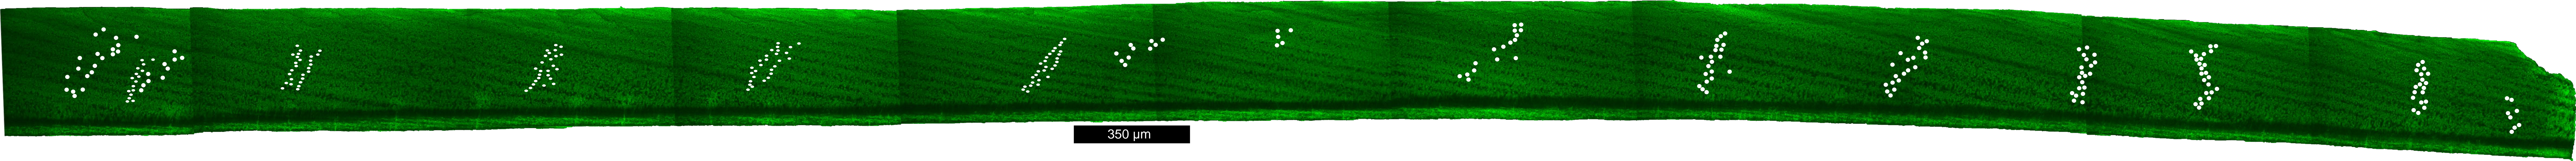

350 μm

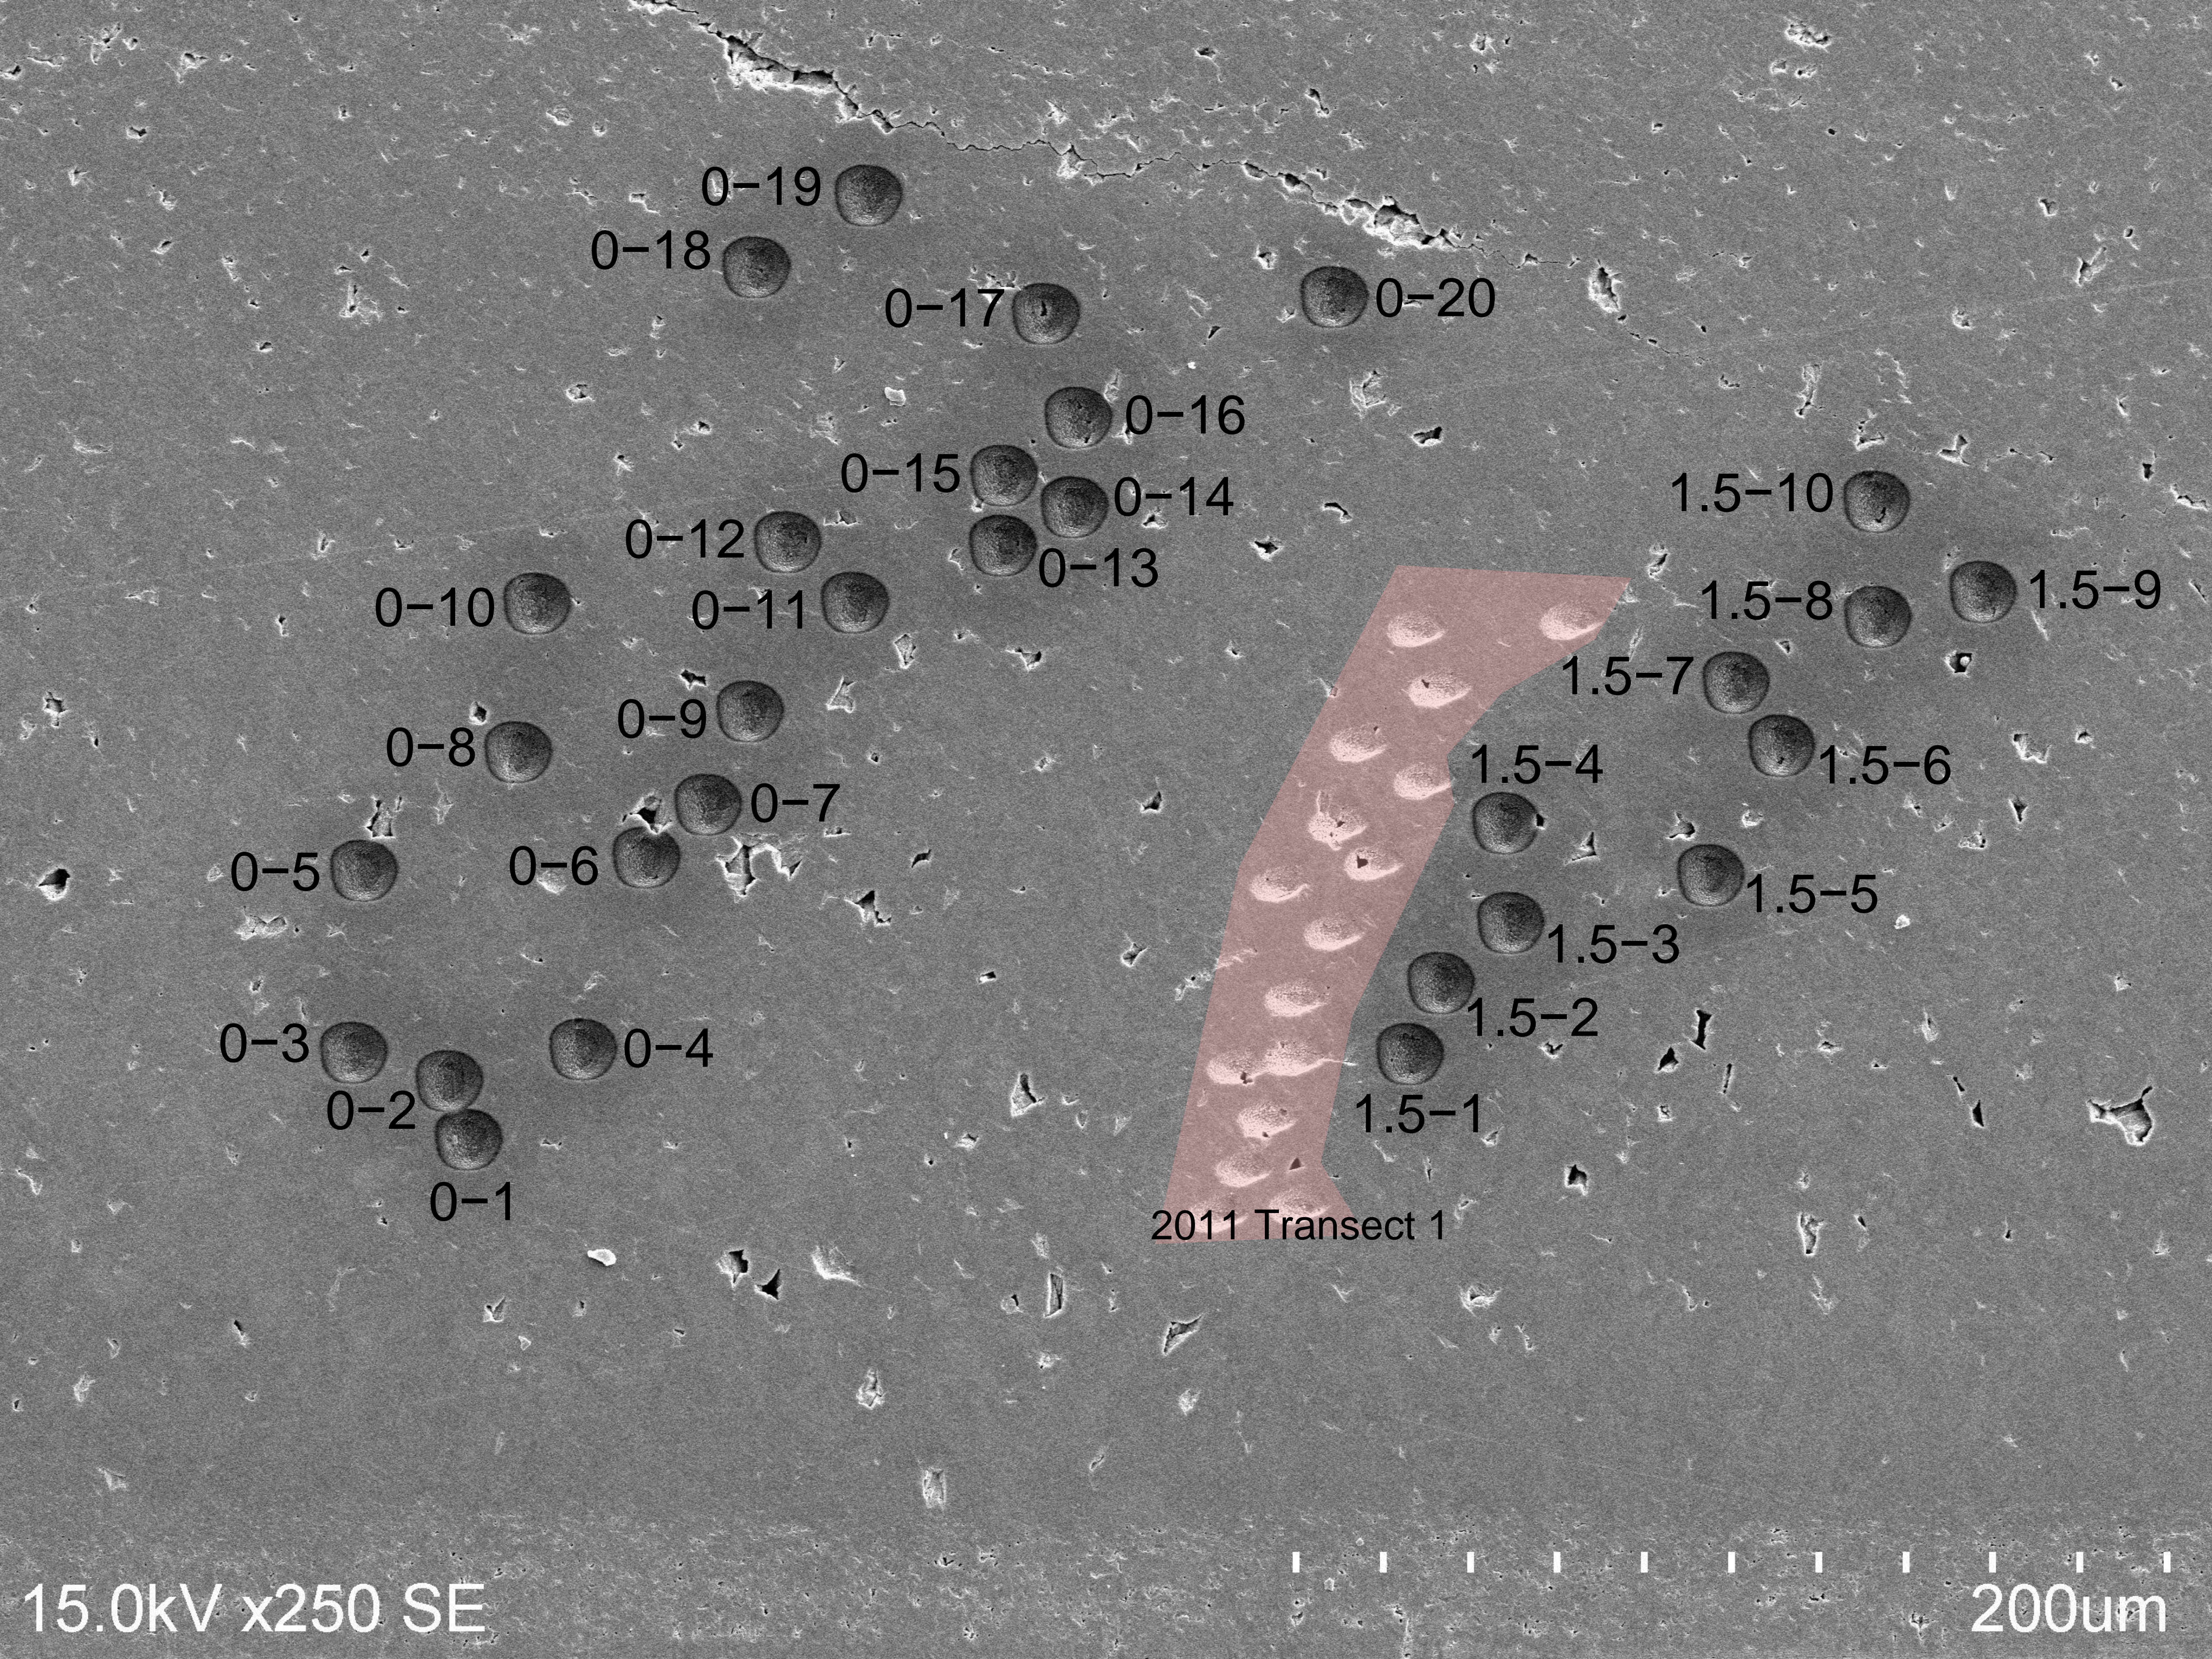

0-19

0-18

0-17

0-20

0-16

0-15

0-14

1.5-10

0-12

0-13

1.5-8

1.5-9

0-10

0-11

1.5-7

0-8

0-9

1.5-4

1.5-6

0-6

0-7

1.5-5

0-5

1.5-3

0-3

0-4

1.5-2

0-2

1.5-1

0-1

2011 Transect 1

15.0kV x250 SE

200um

Growth Direction

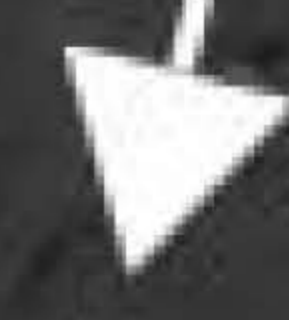

1-15

1-16

1-14

1-13

1-12

1-11

1-9

1-10

1-8

1-7

1-5

1-6

1-4

1-3

1-2

1-1

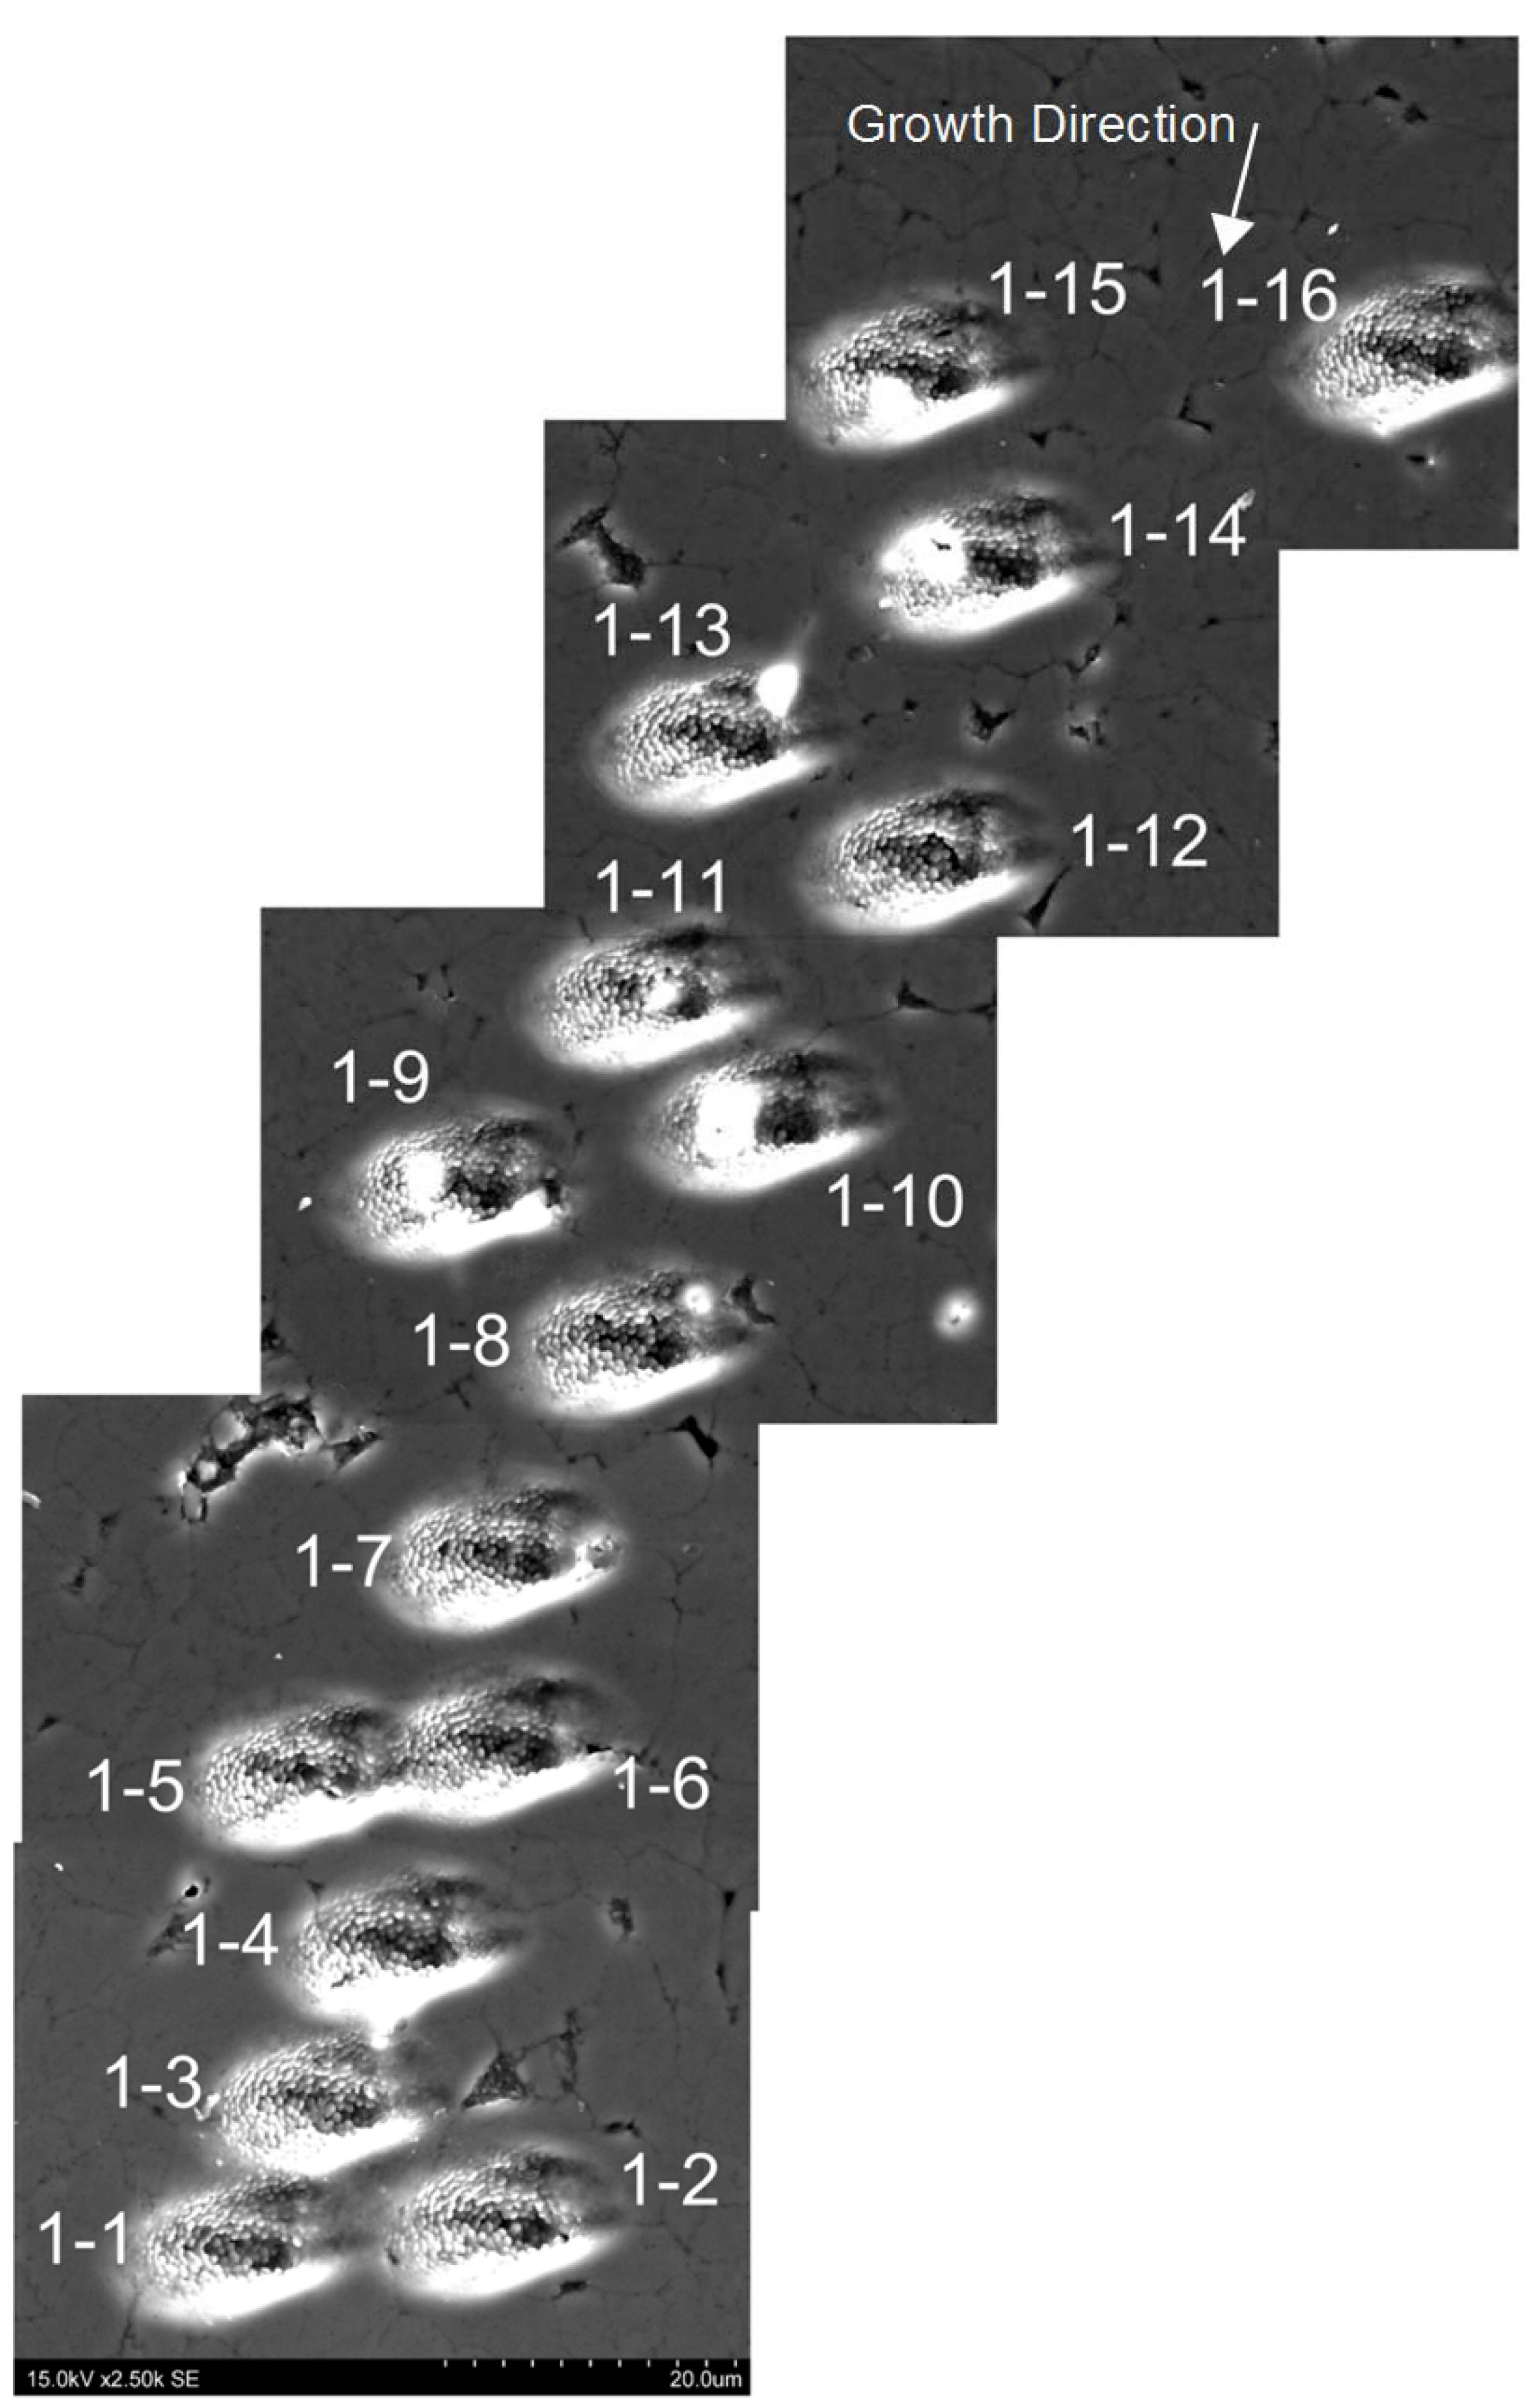

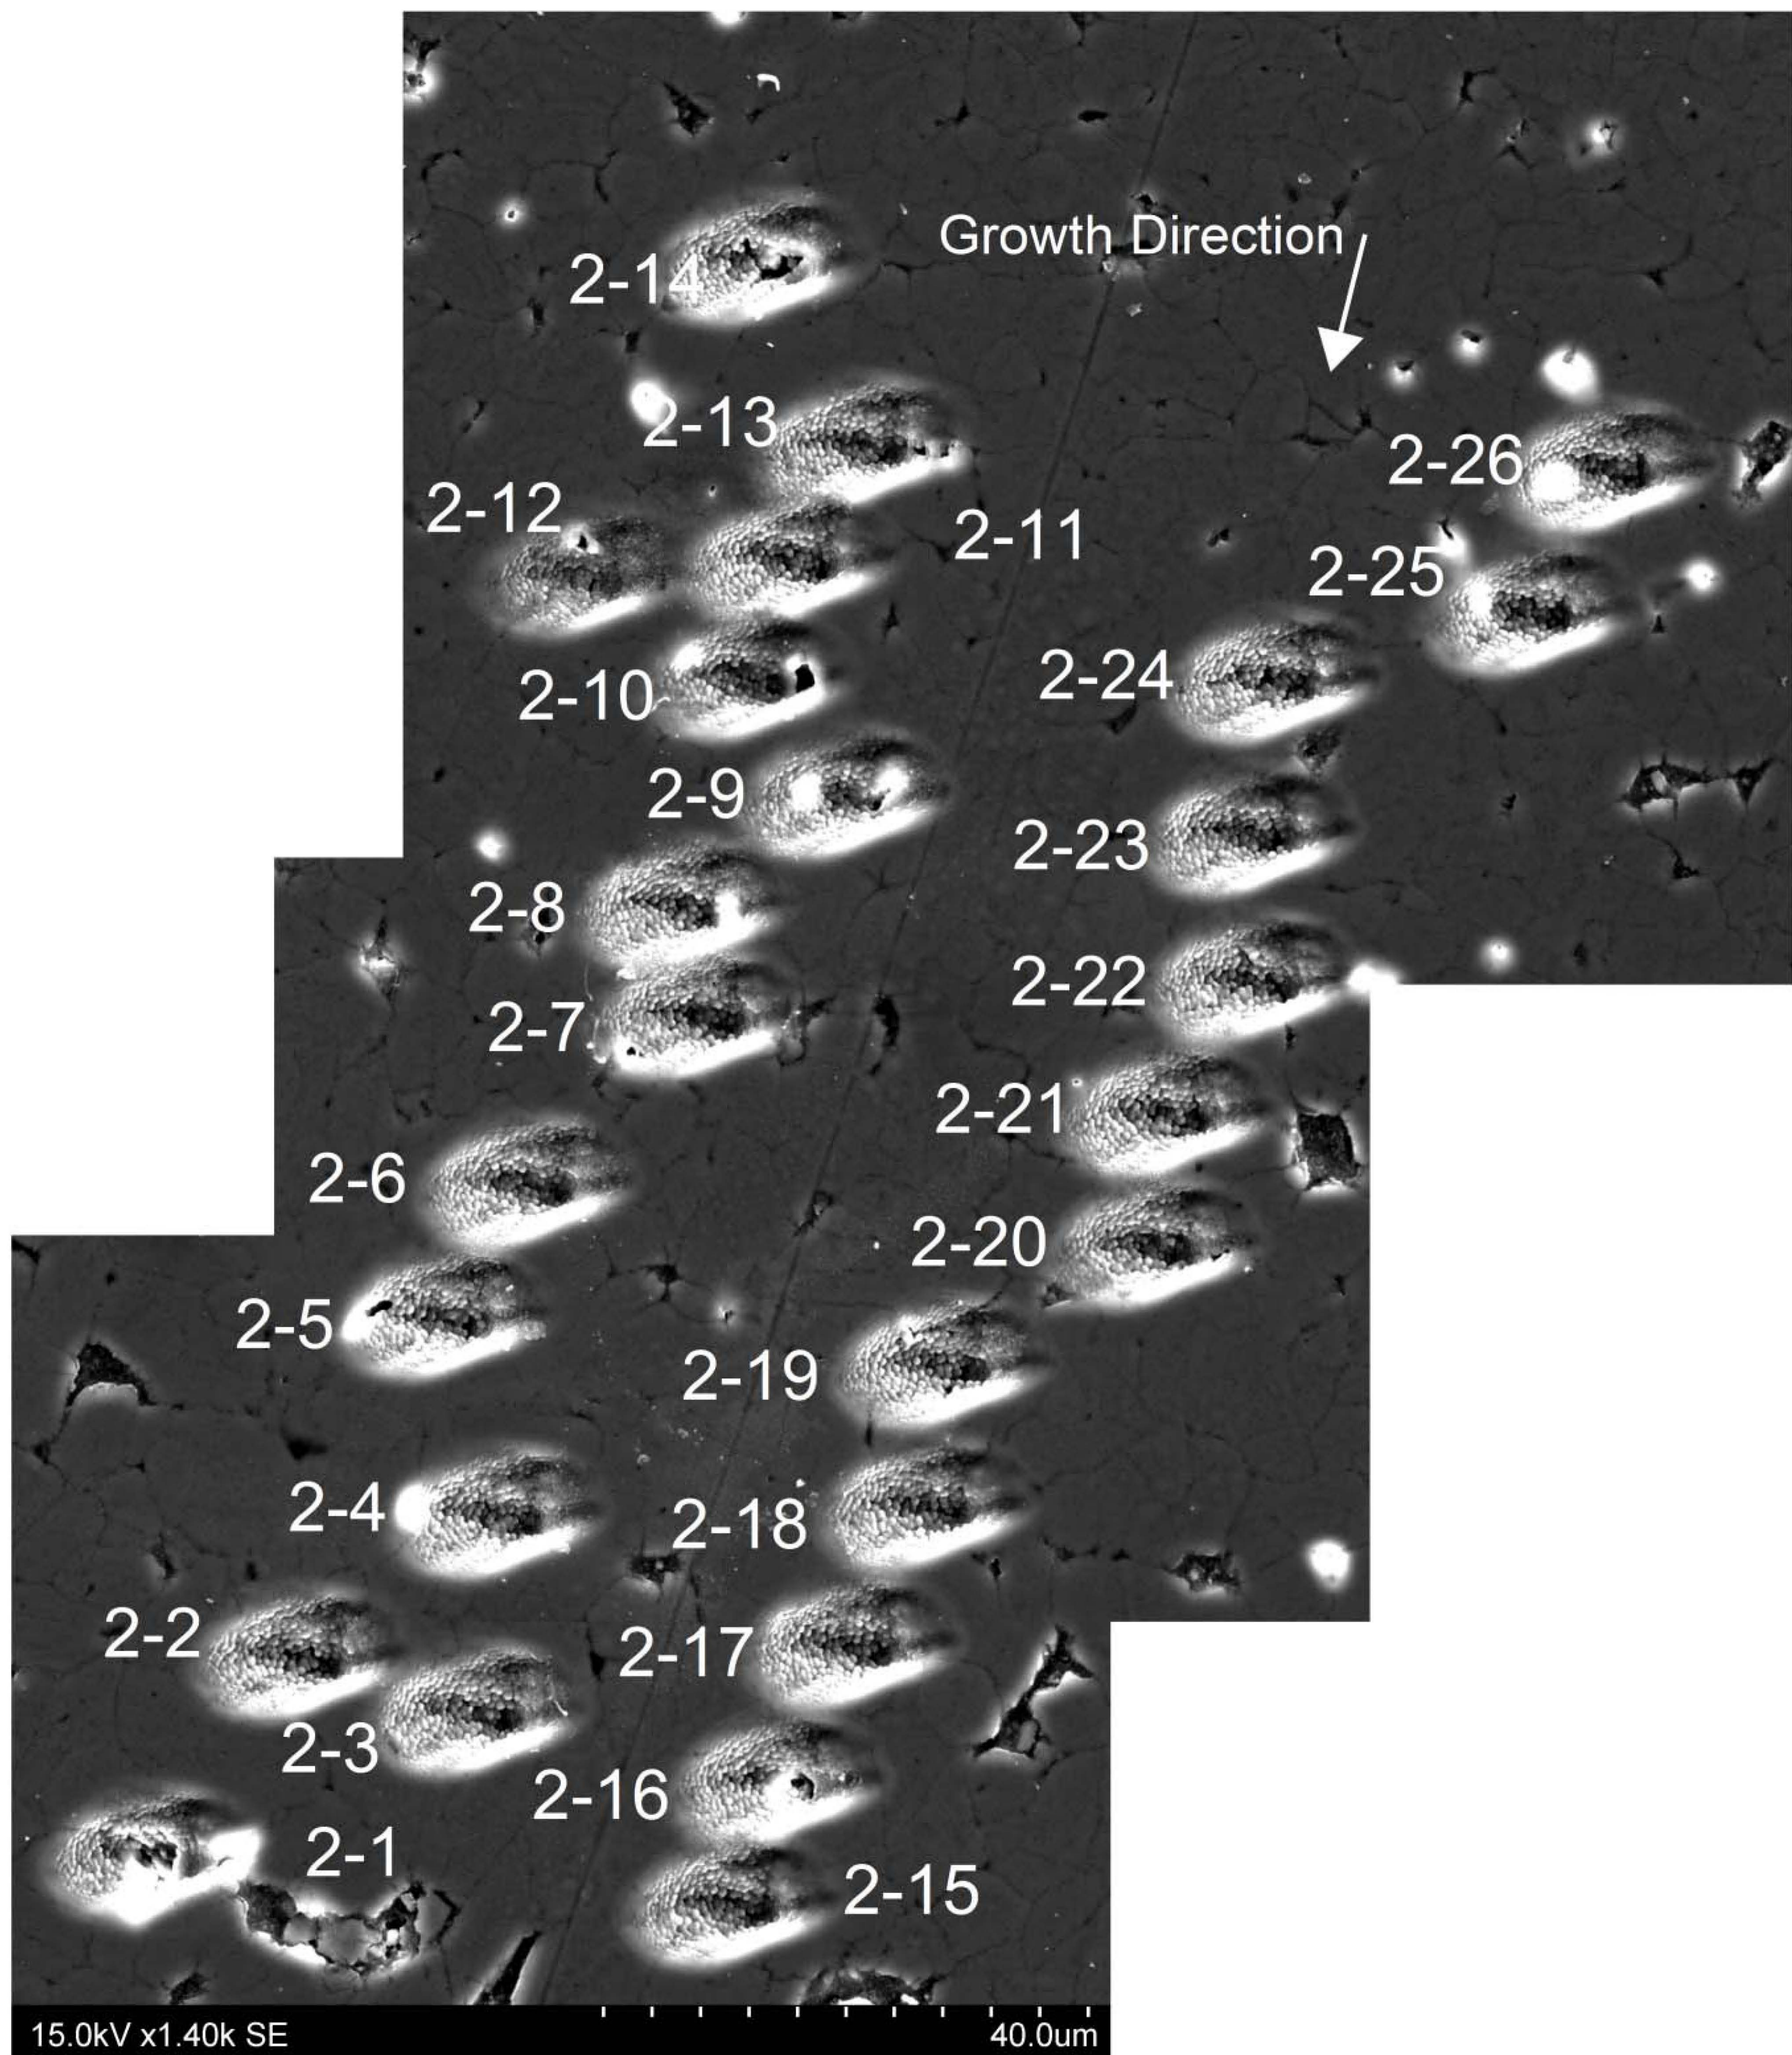

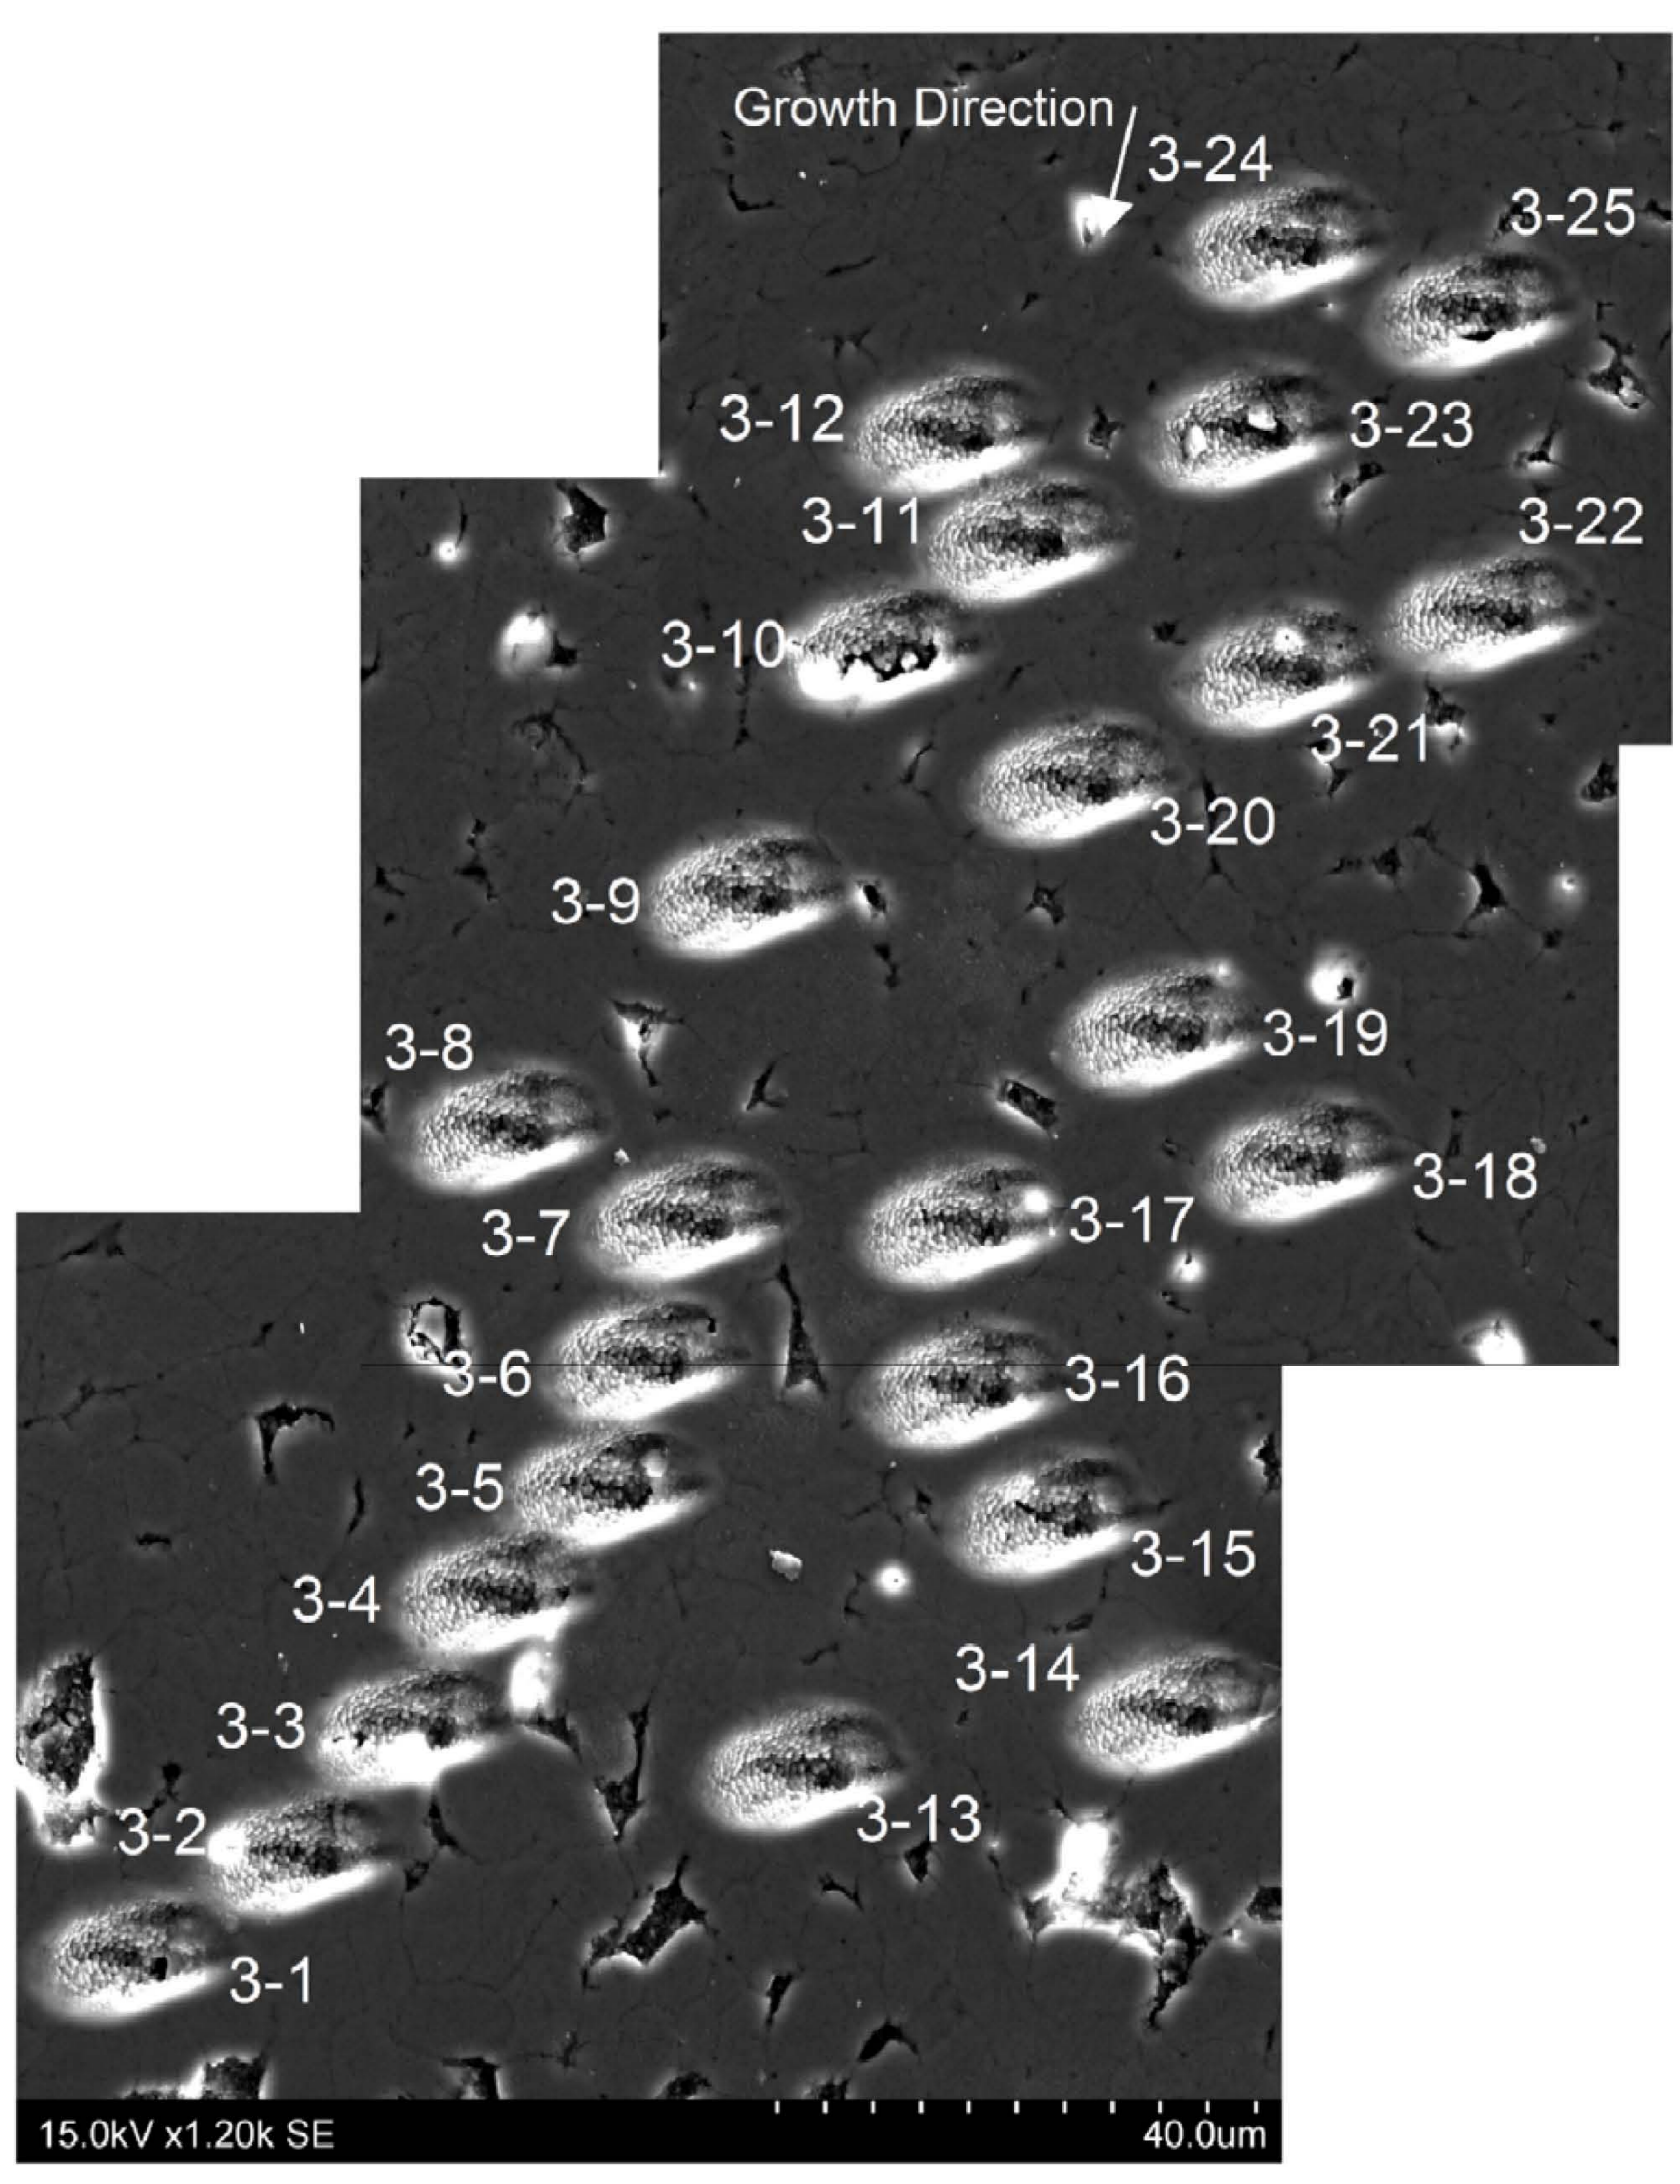

Growth Direction

3-24

3-25

3-12

3-23

3-11

3-22

3-10

3-21

3-20

3-9

3-8

3-19

3-18

3-7

3-17

3-6

3-16

3-5

3-15

3-4

3-14

3-3

3-13

3-2

3-1

15.0kV x1.20k SE

40.0um

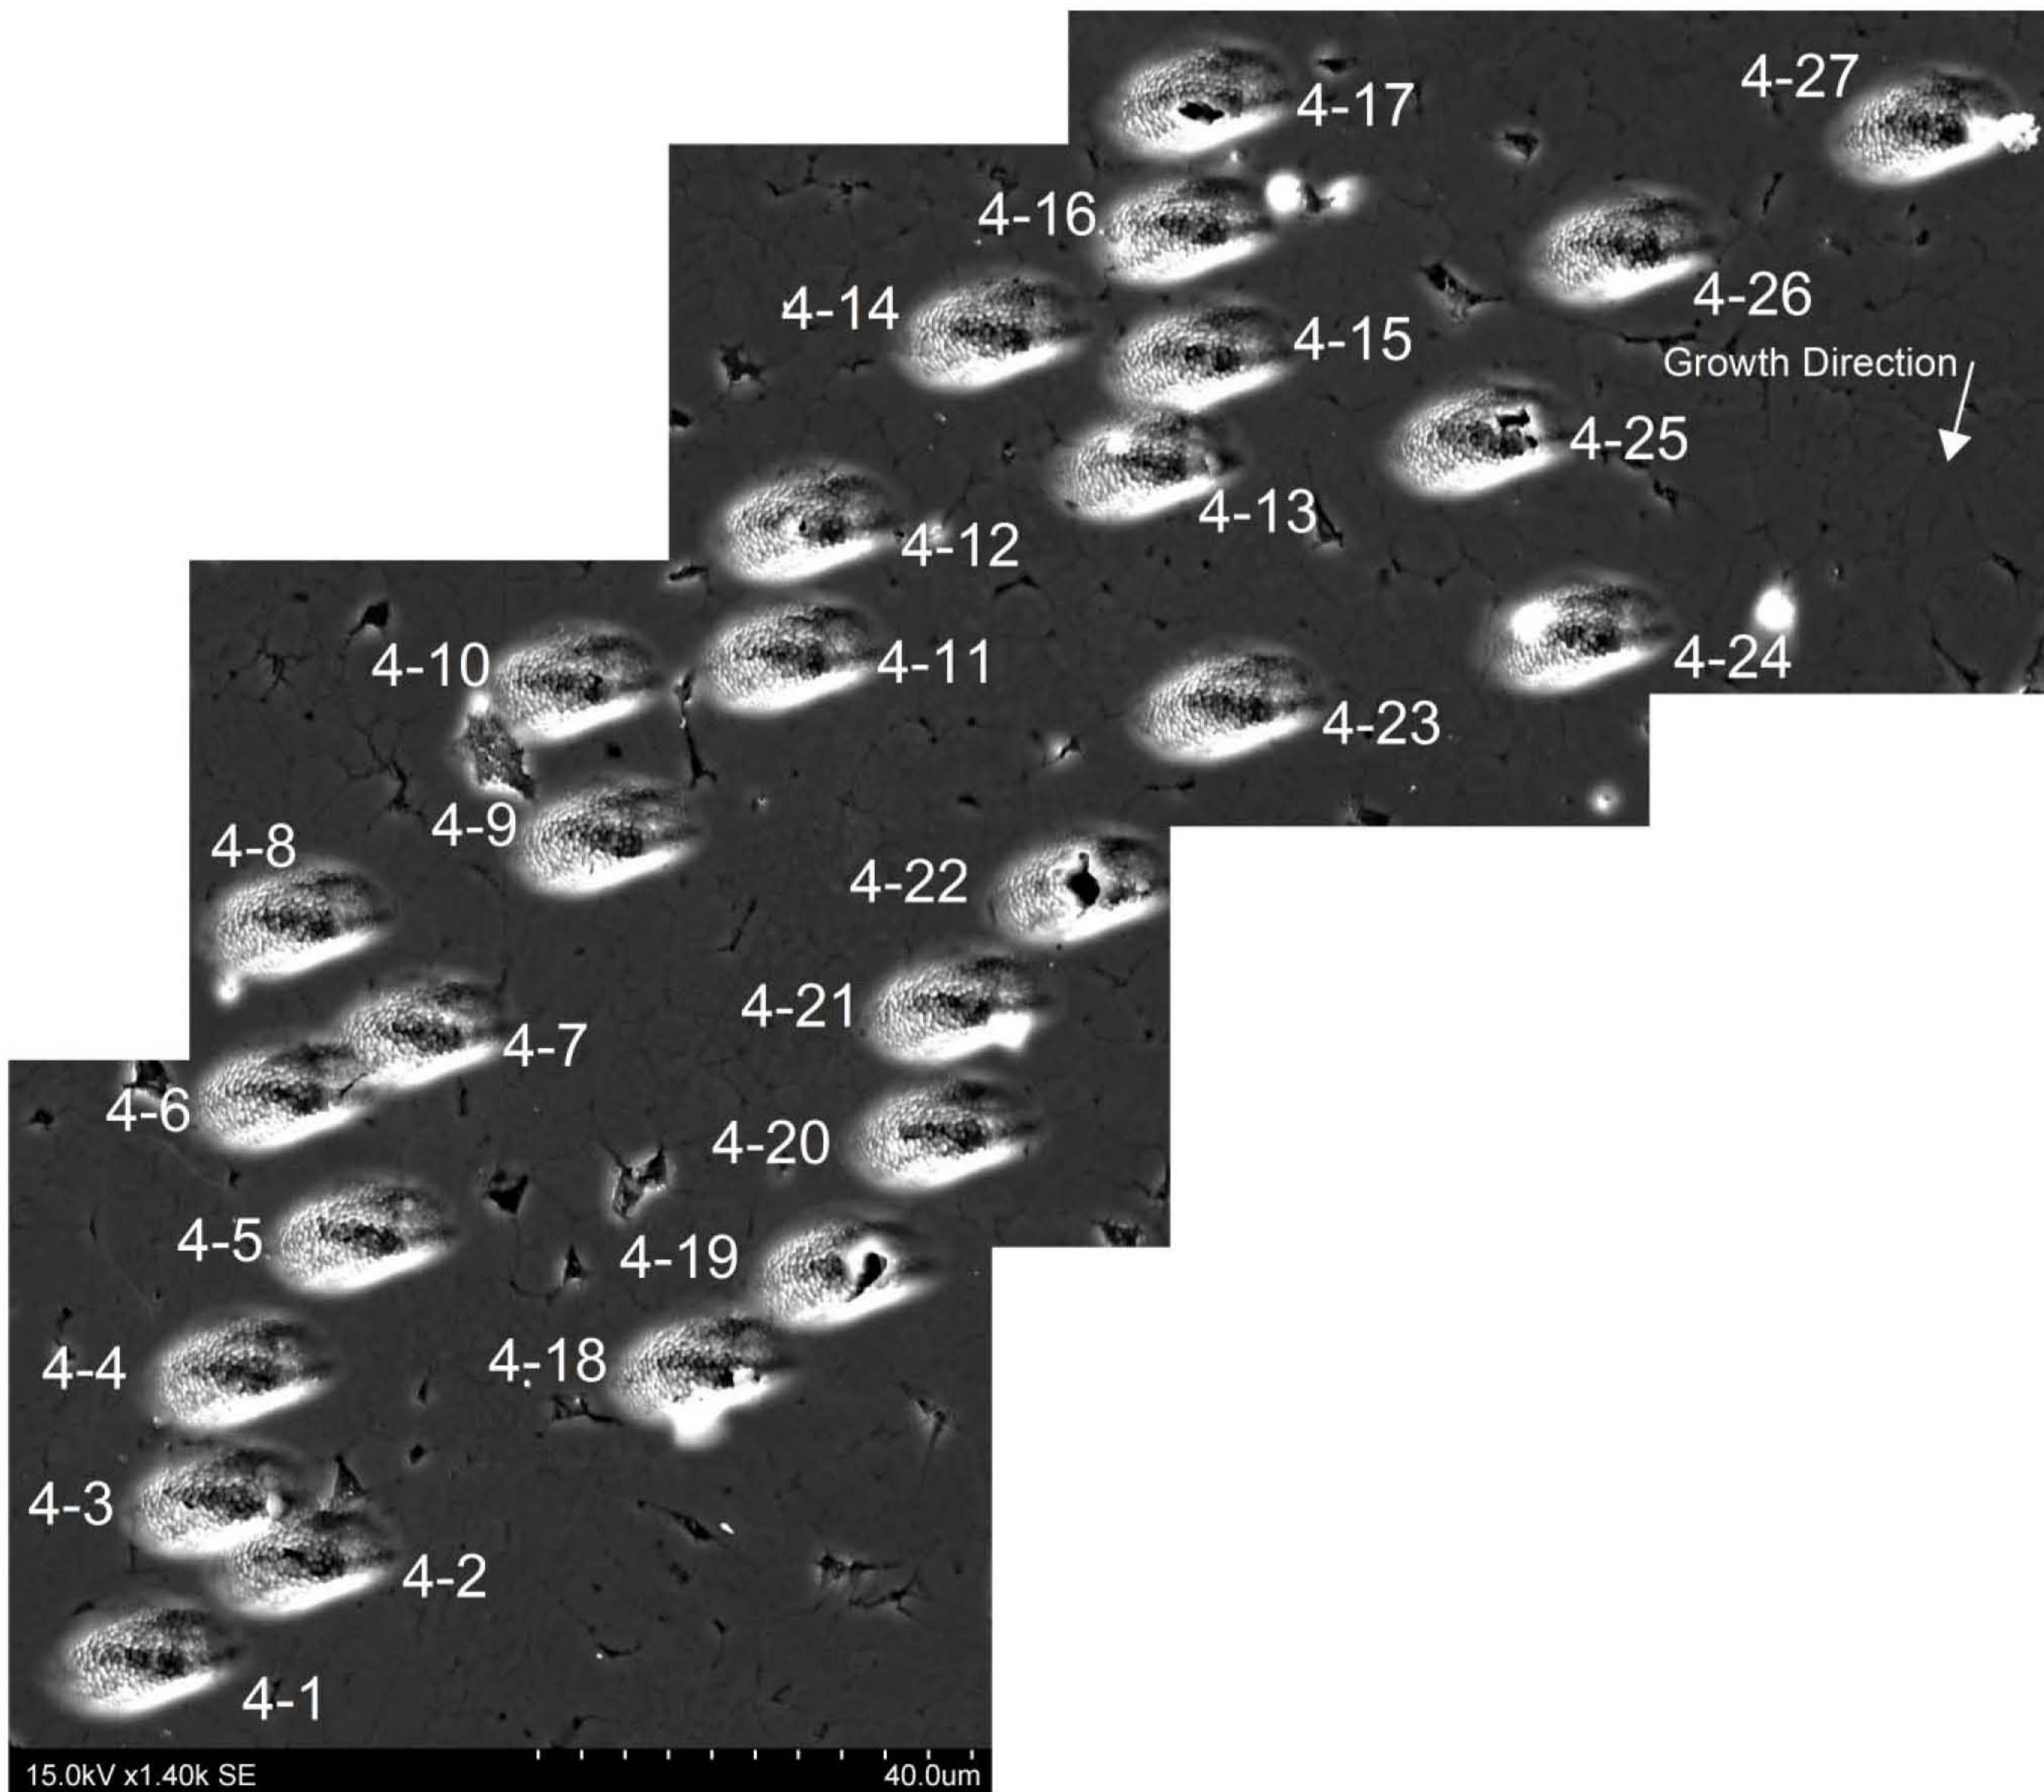

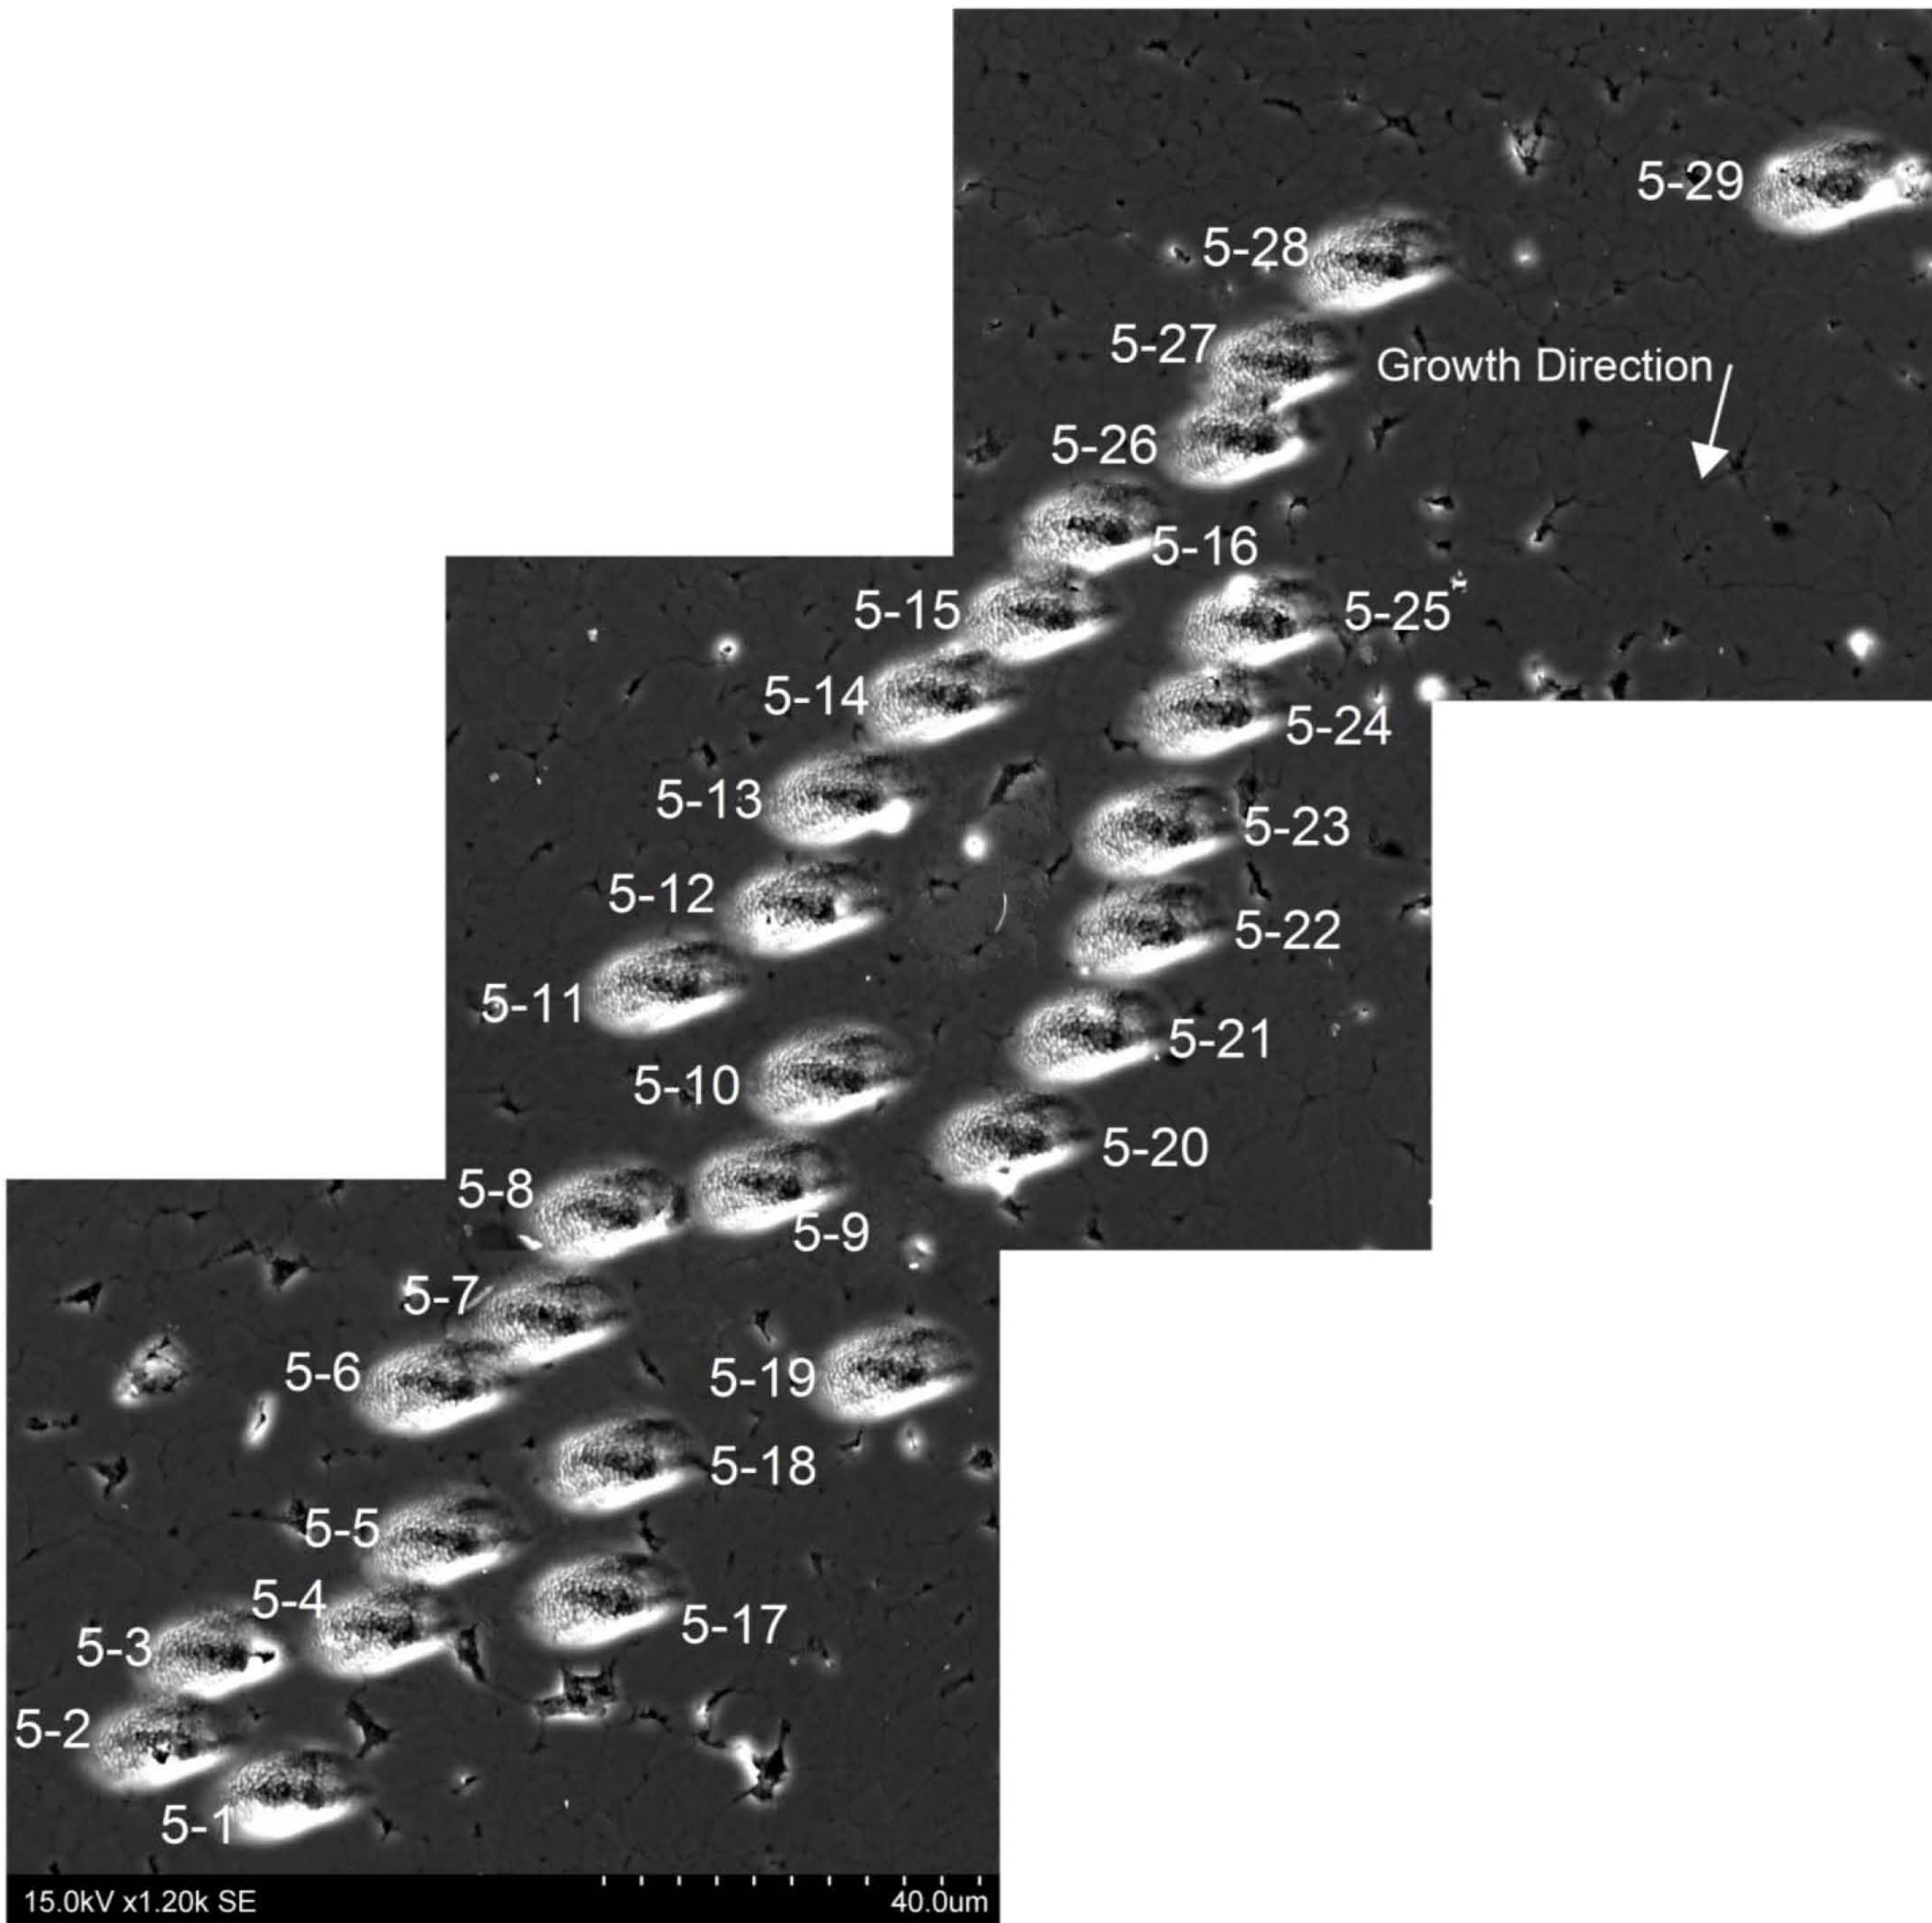

5-29

5-28

5-27

Growth Direction

5-26

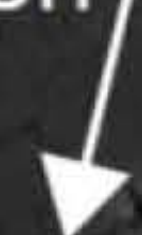

5-16

5-15

5-25

5-14

5-24

5-13

5-23

5-12

5-22

5-11

5-21

5-10

5-20

5-8

5-9

5-7

5-6

5-19

5-18

5-5

5-4

5-17

5-3

5-2

5-1

15.0kV x1.20k SE

40.0um



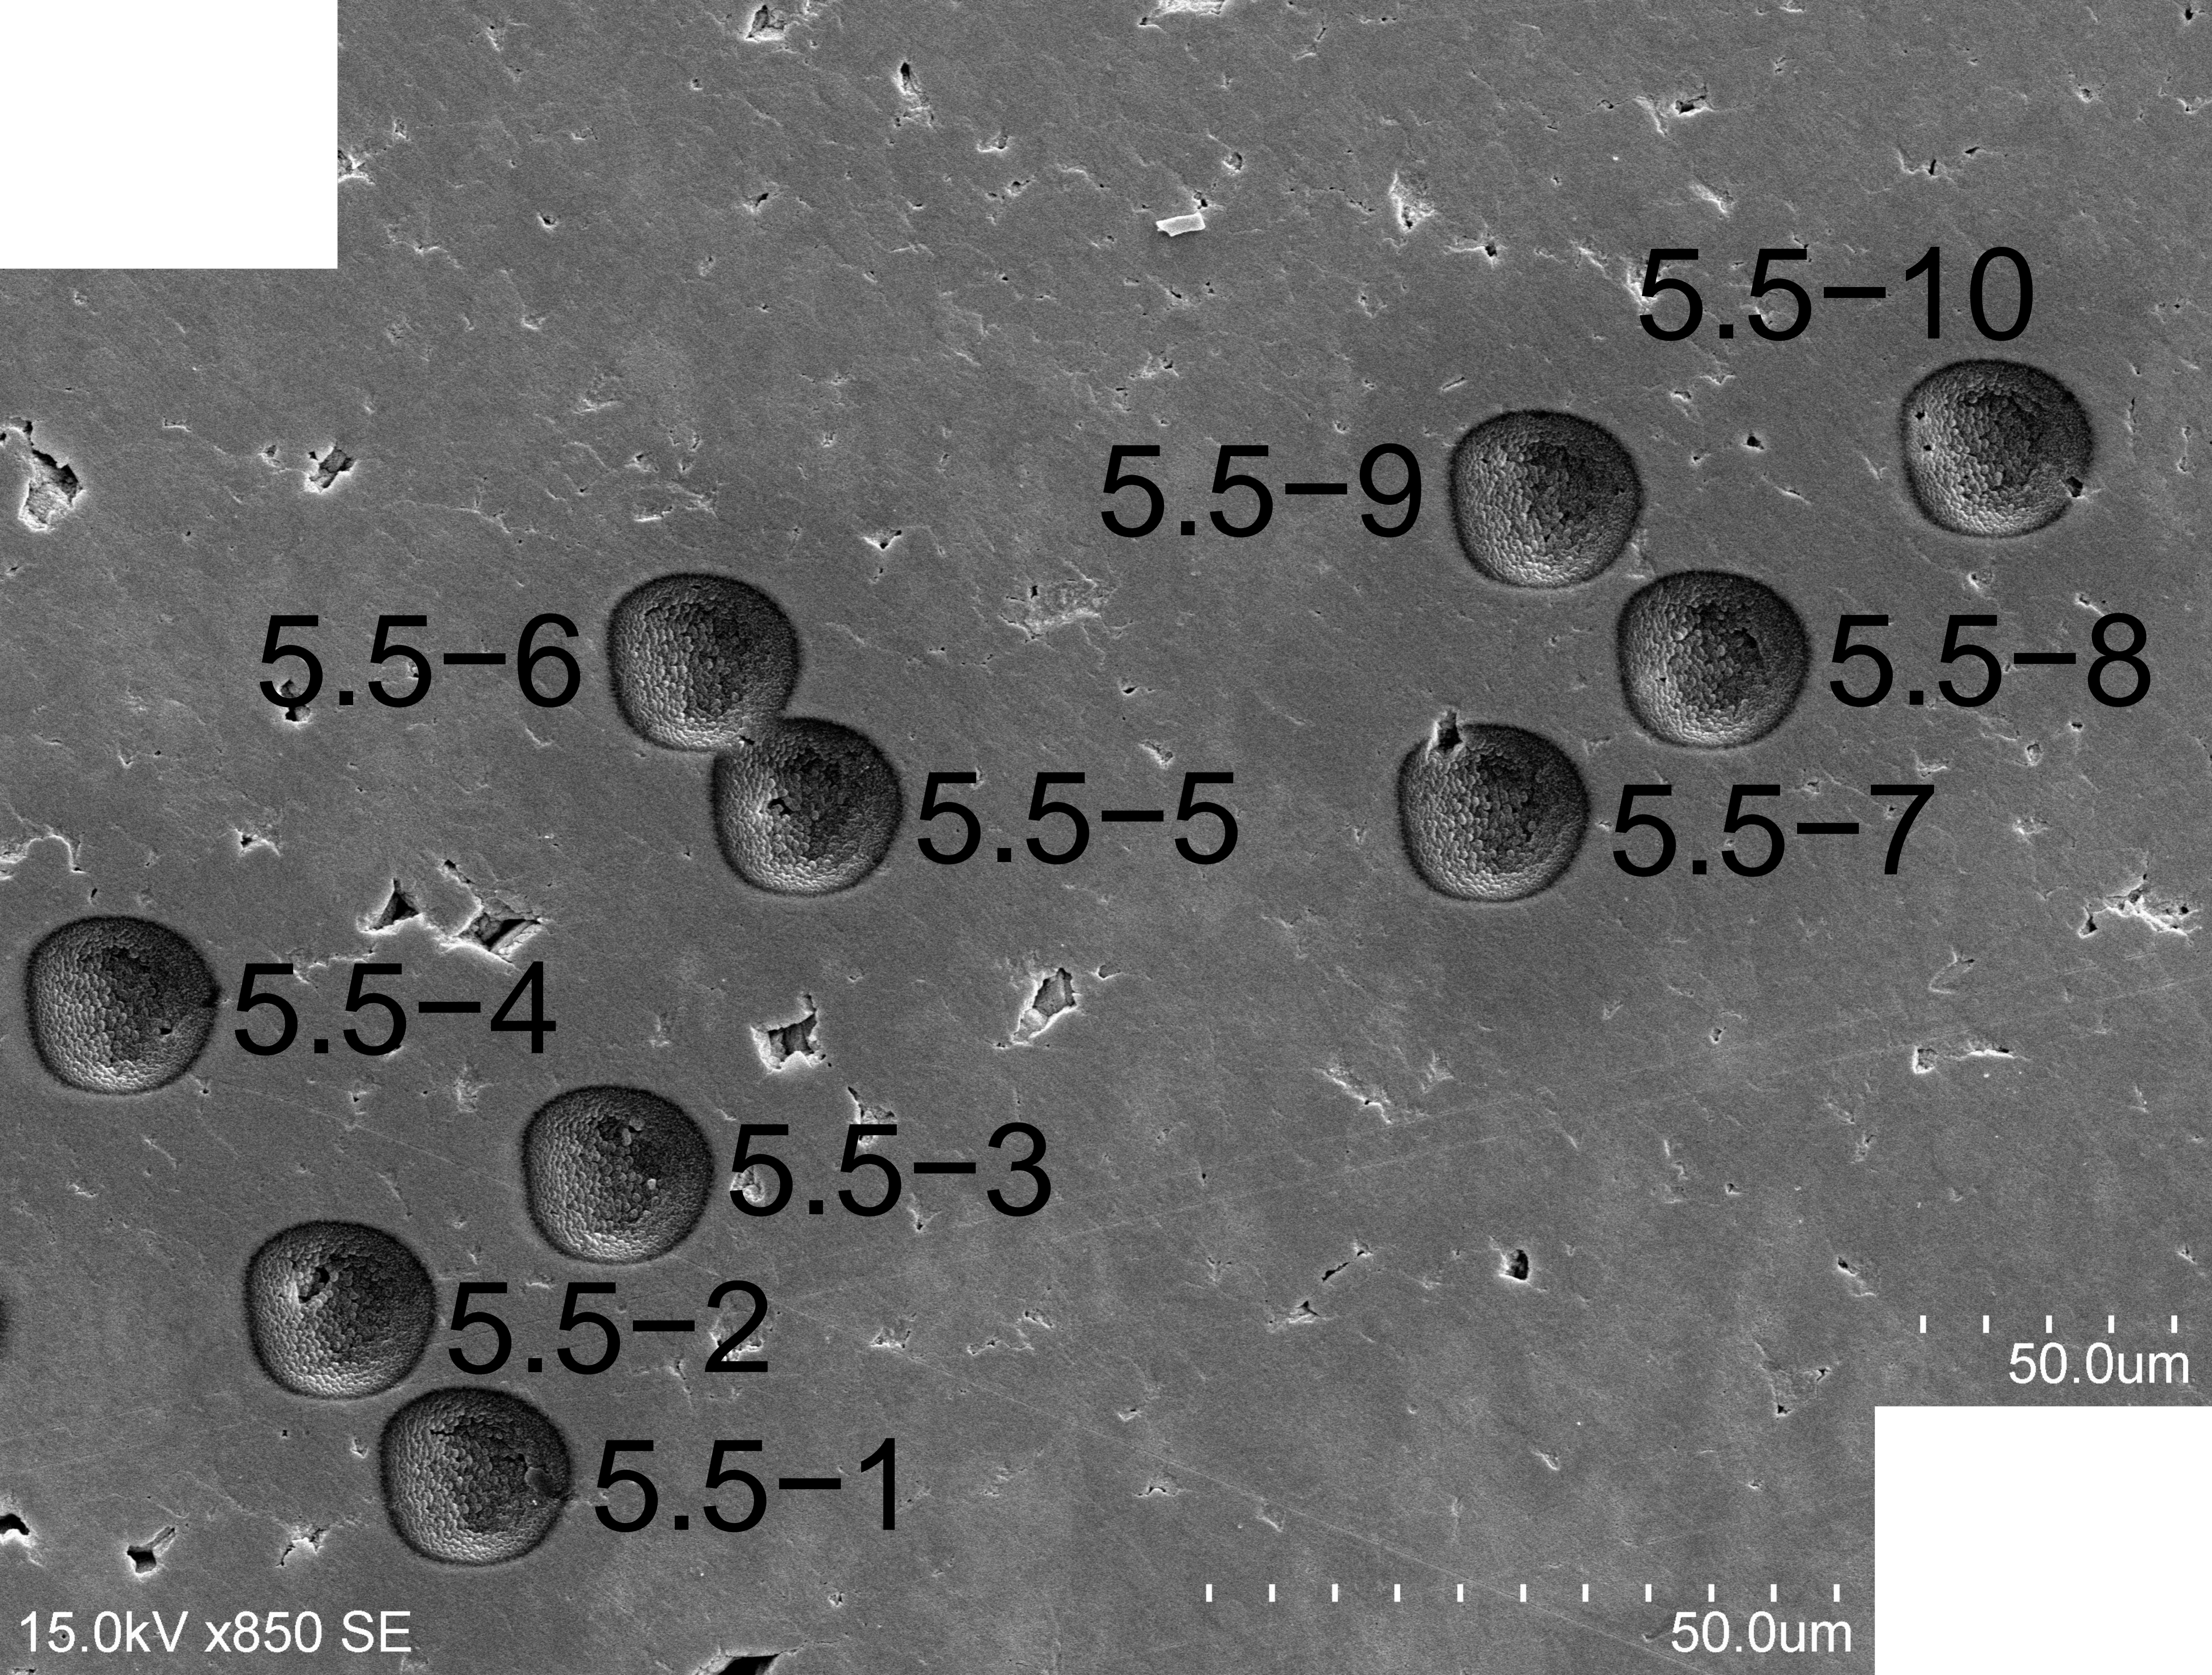

5.5-6

5.5-9

5.5-10

5.5-8

5.5-5

5.5-7

5.5-4

5.5-3

5.5-2

5.5-1

50.0um

50.0um

15.0kV x850 SE

5.5-14

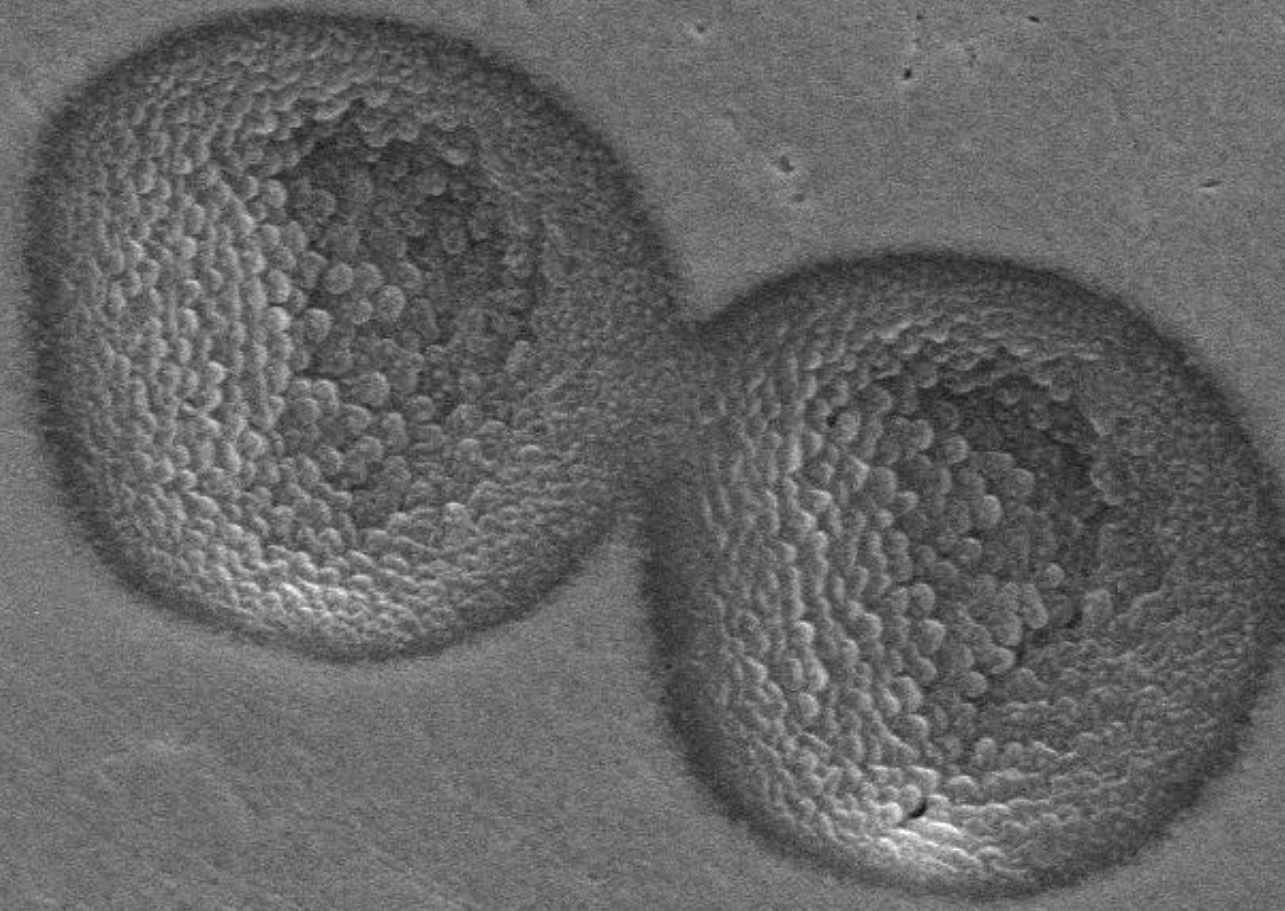

5.5-15

5.5-12

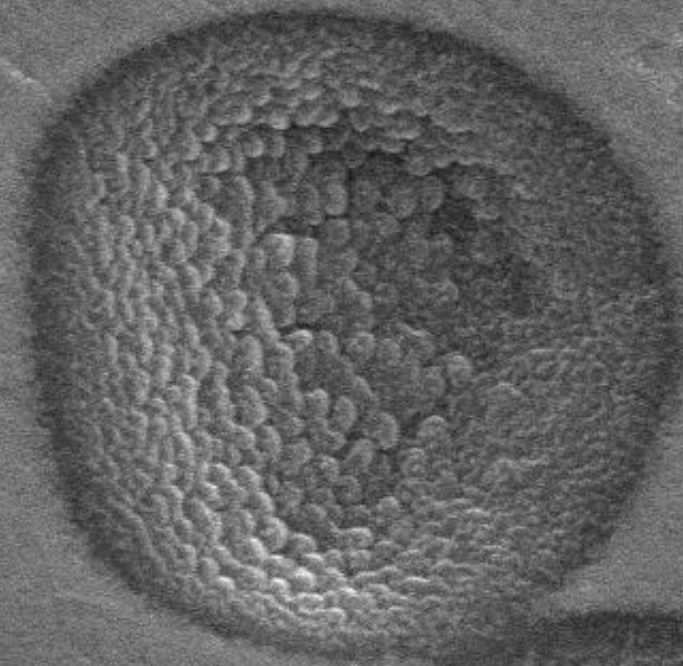

5.5-13

5.5-11

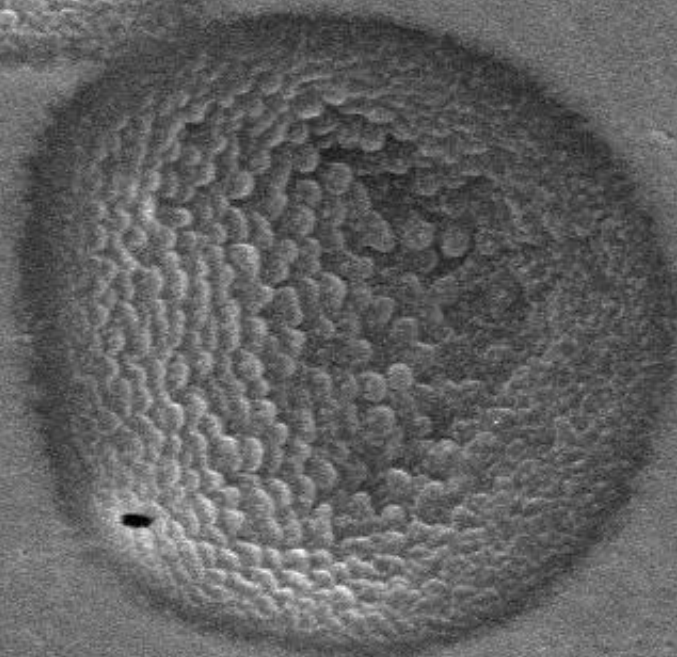

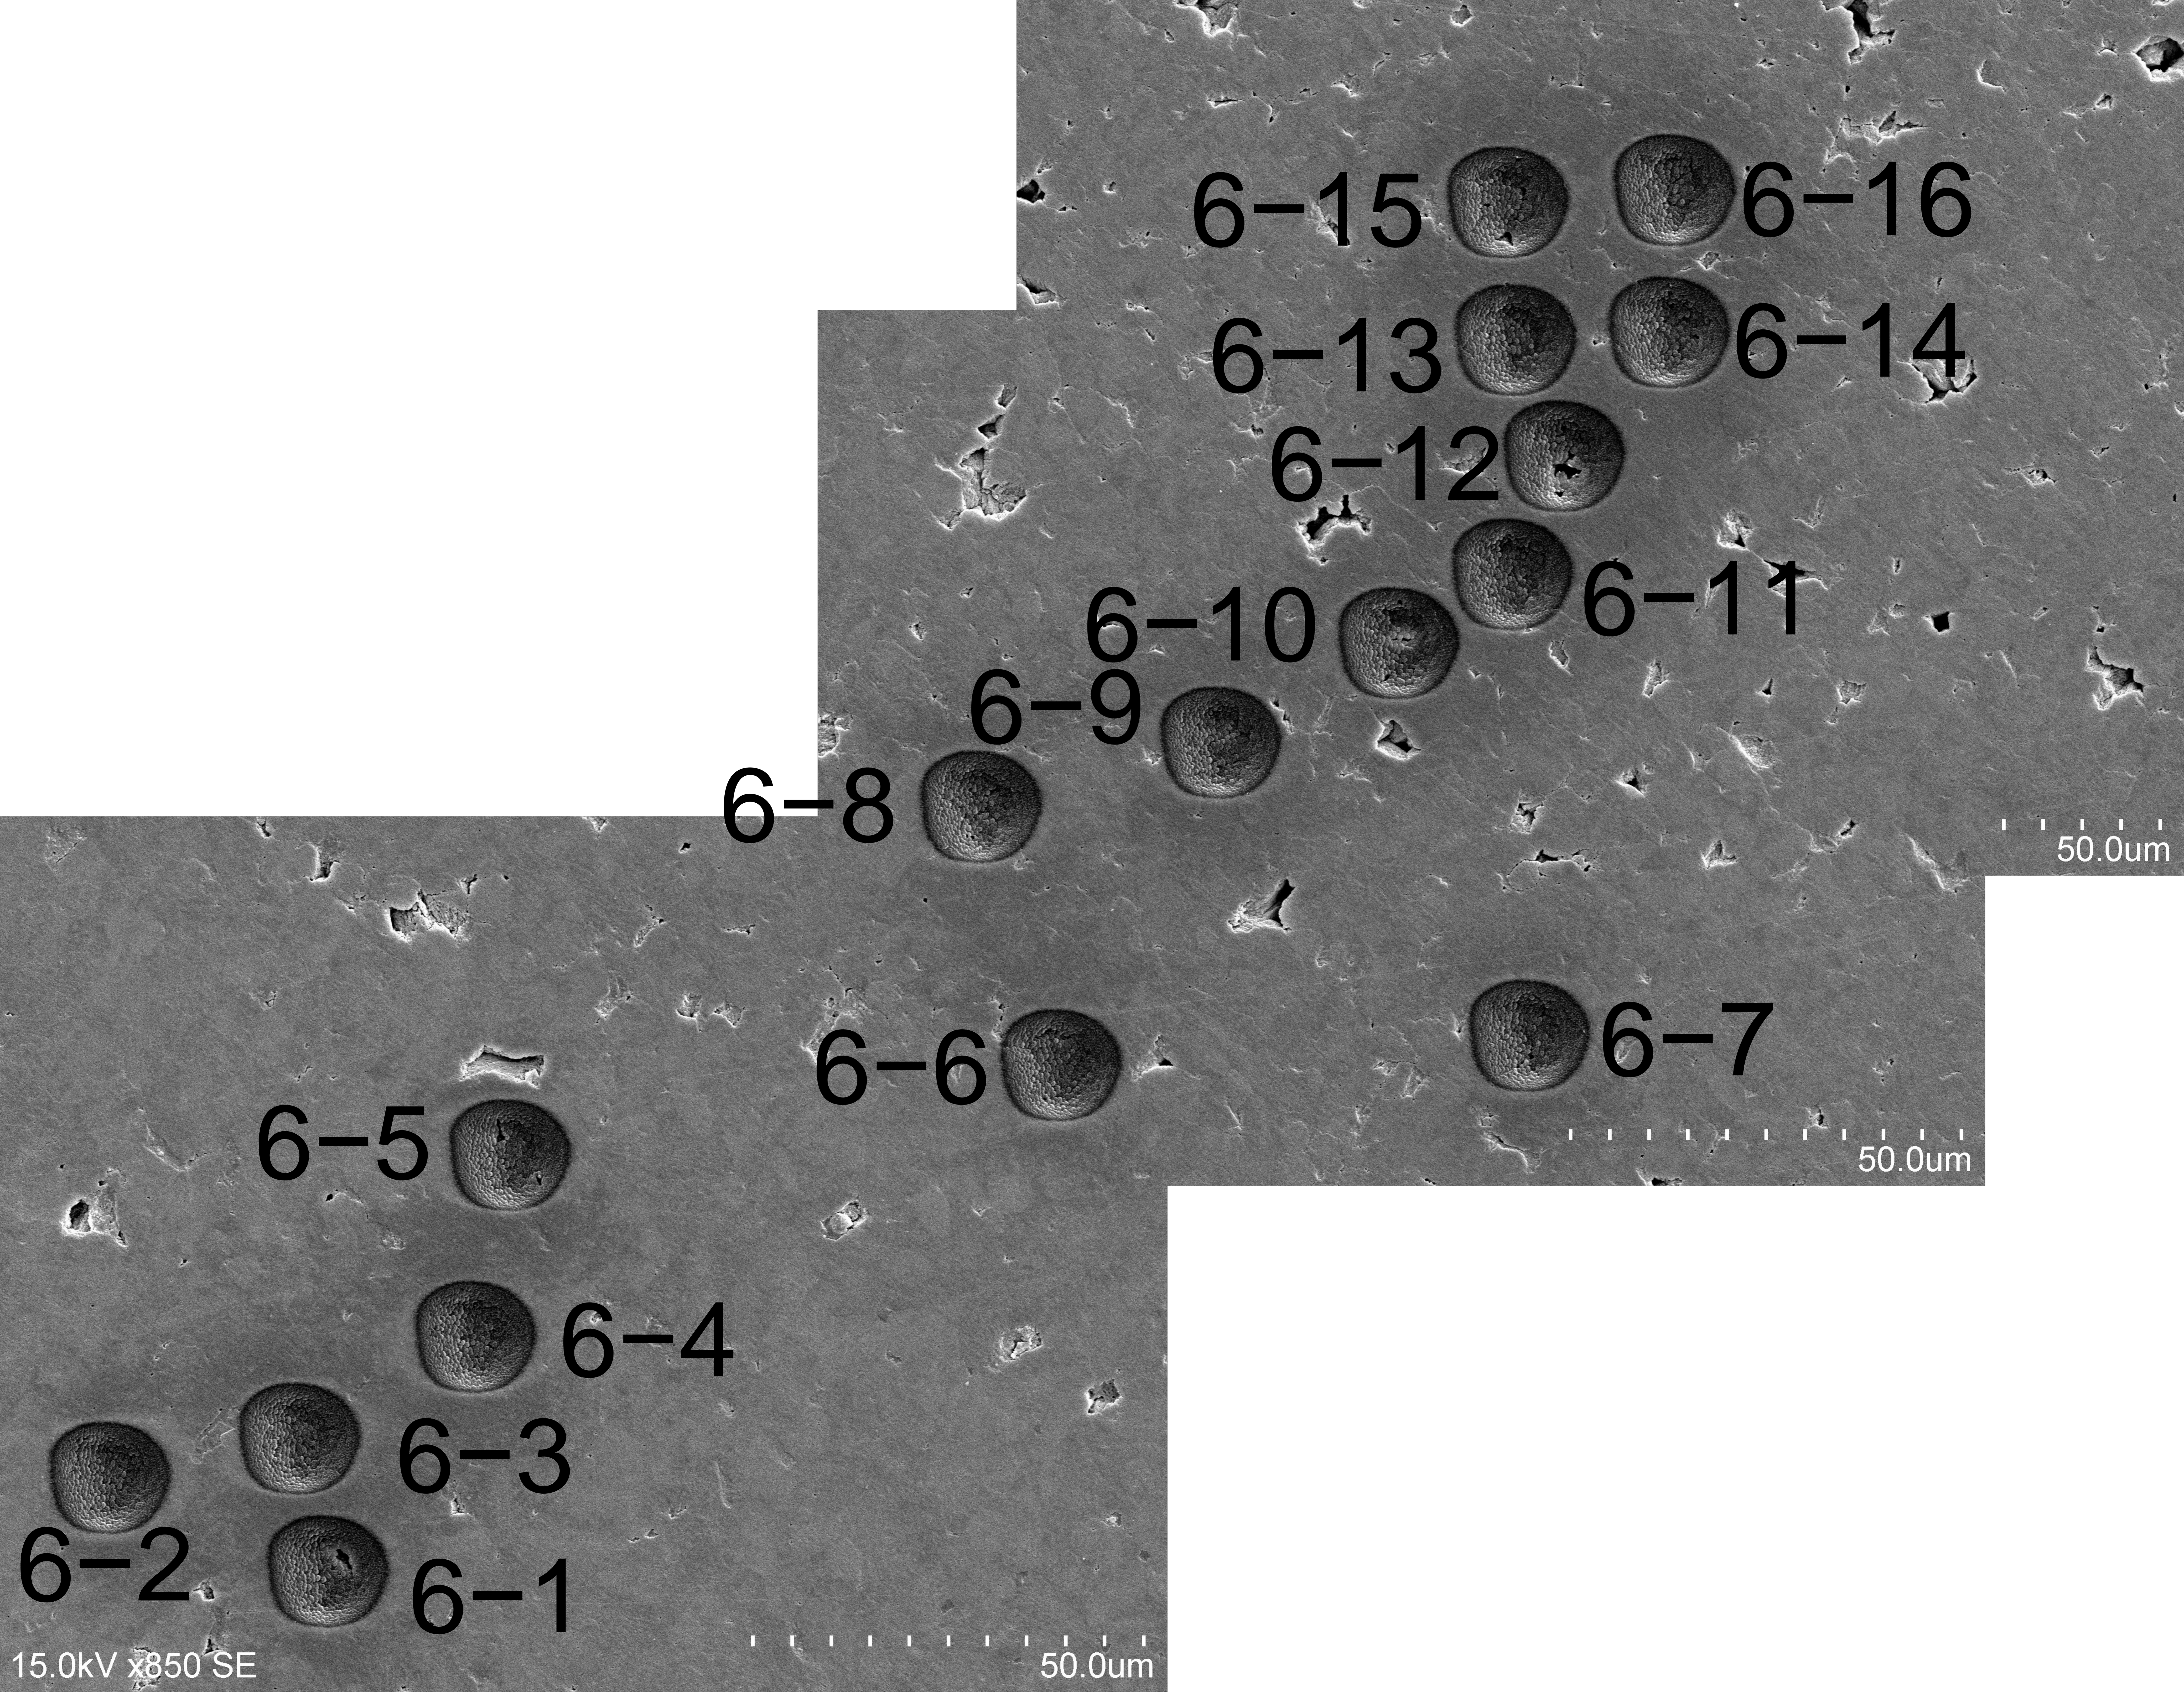

6-15 6-16

6-13 6-14

6-12

6-10 6-11

6-9

6-8

6-6 6-7

6-5

6-4

6-3

6-2 6-1

50.0um

50.0um

50.0um

15.0kV x850 SE

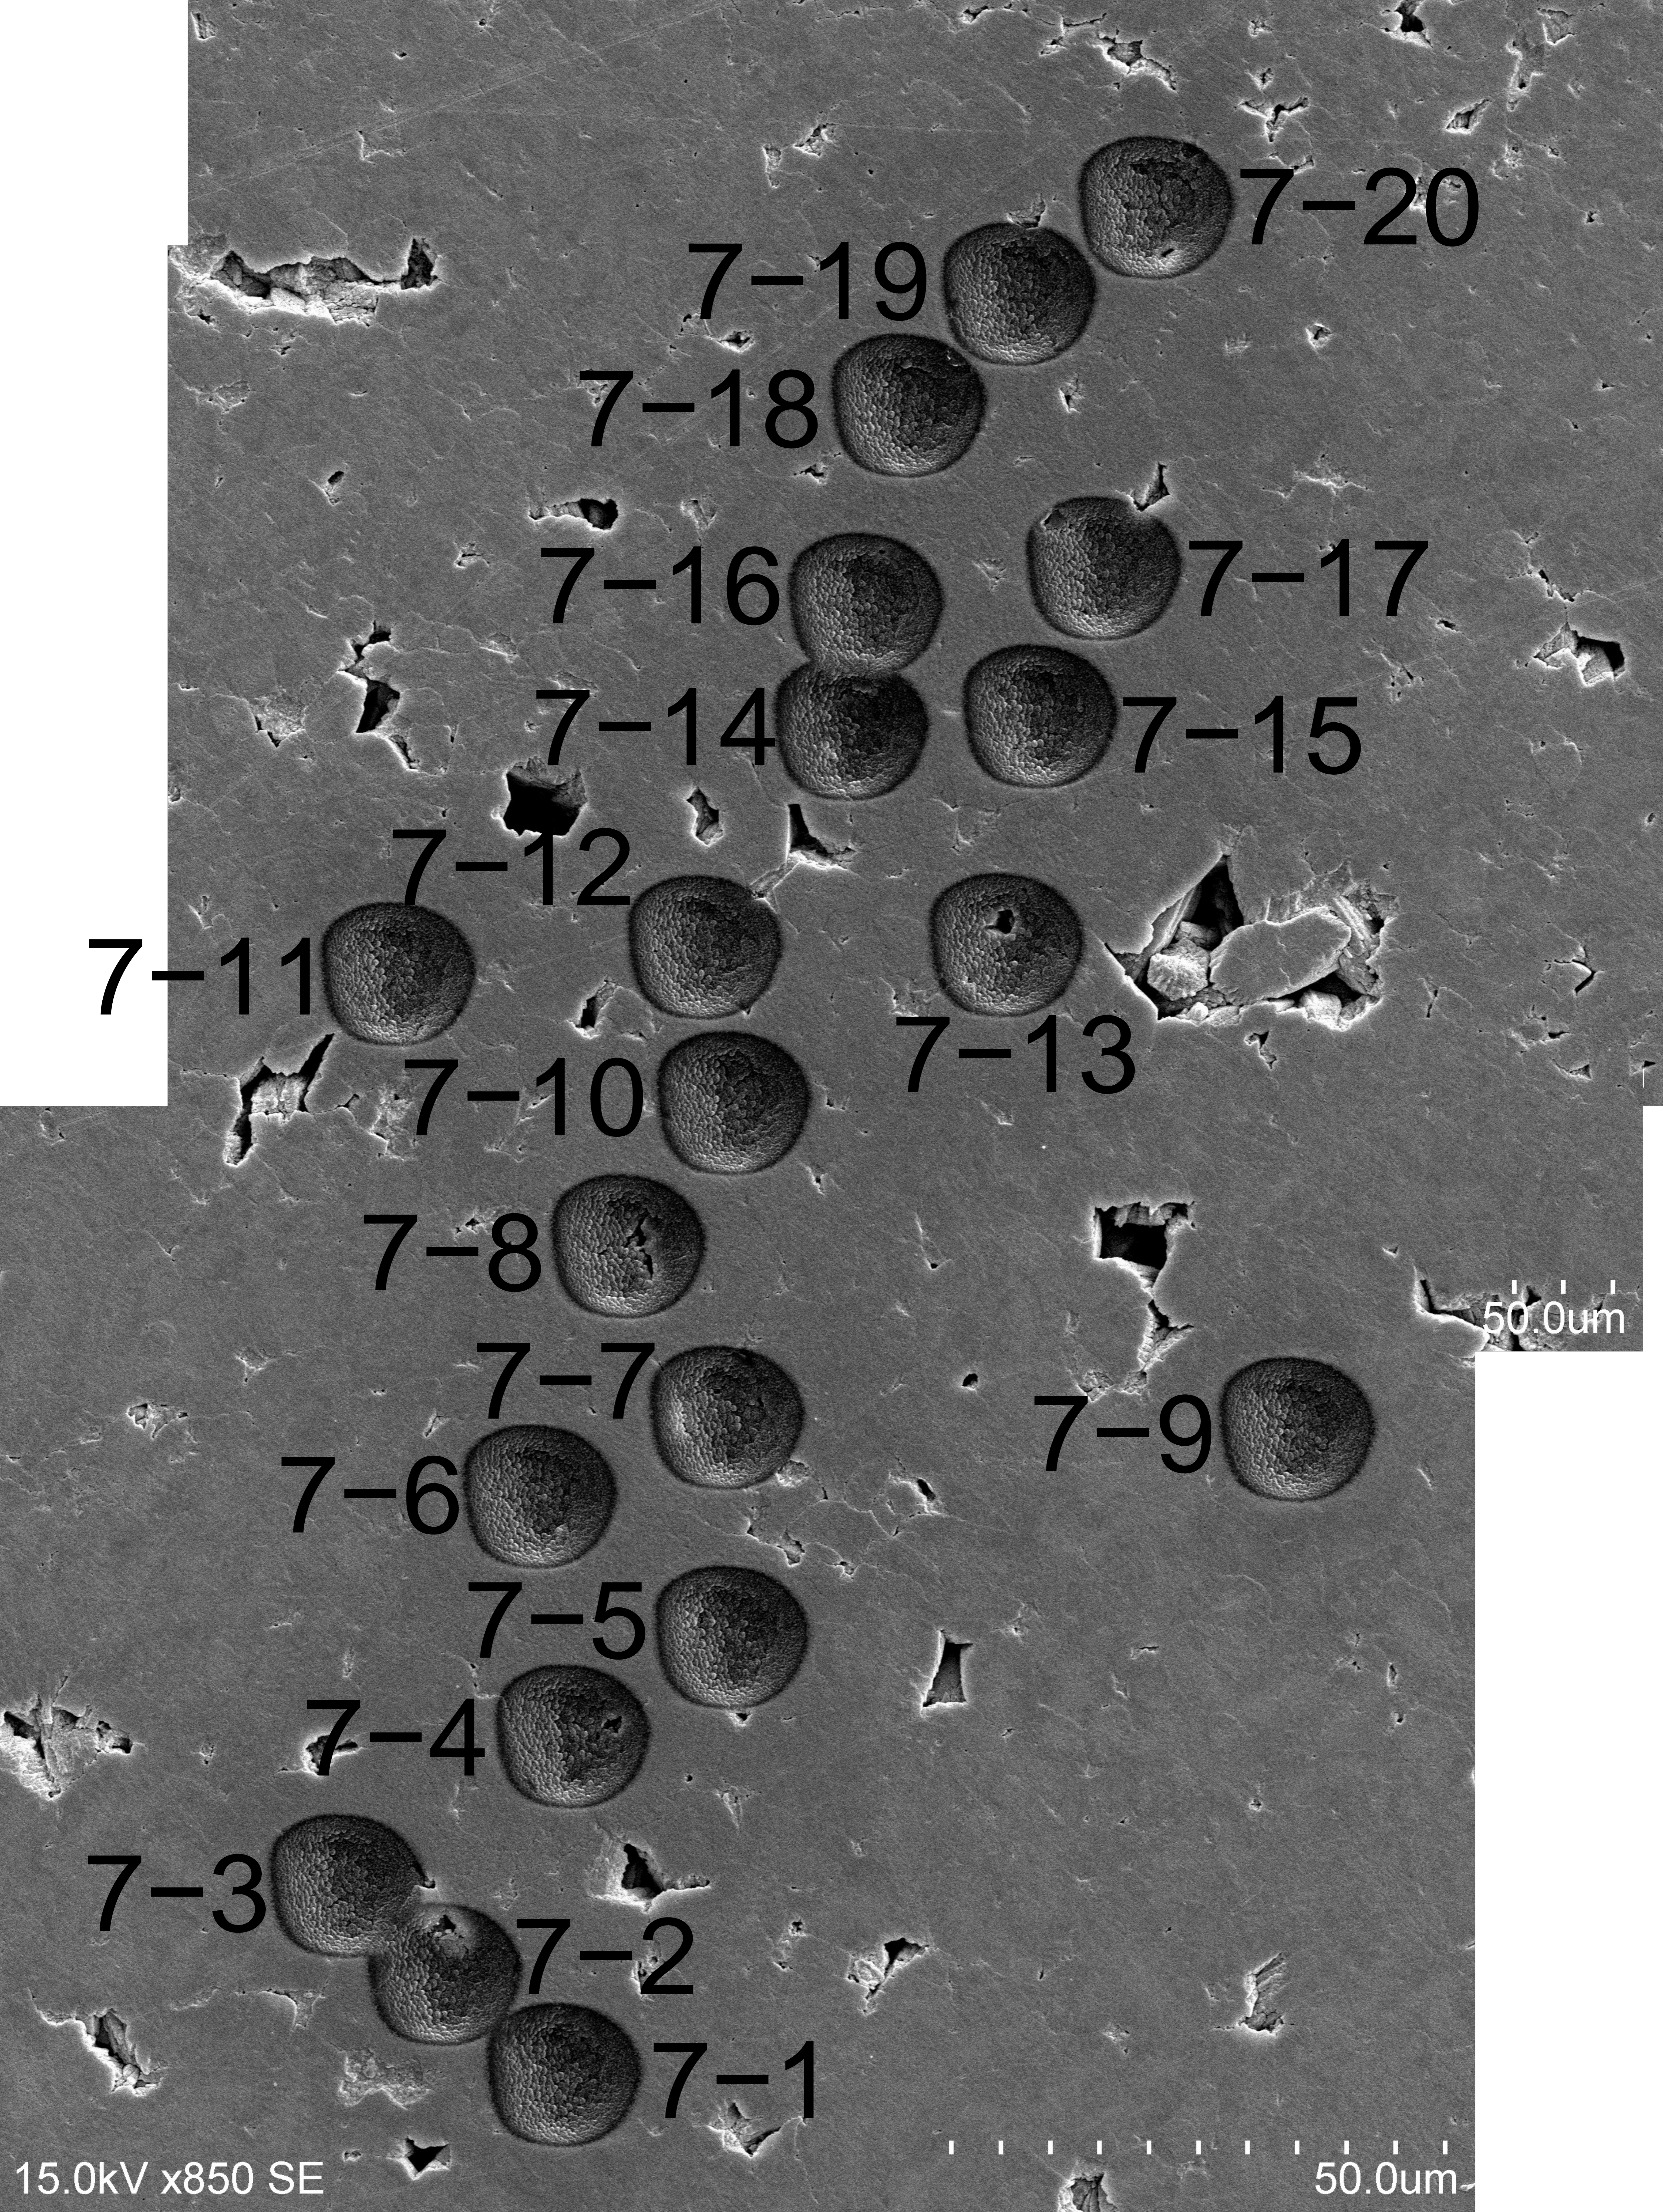

7-20

7-19

7-18

7-16

7-17

7-14

7-15

7-12

7-11

7-13

7-10

7-8

50.0um

7-7

7-9

7-6

7-5

7-4

7-3

7-2

7-1

50.0um

15.0kV x850 SE

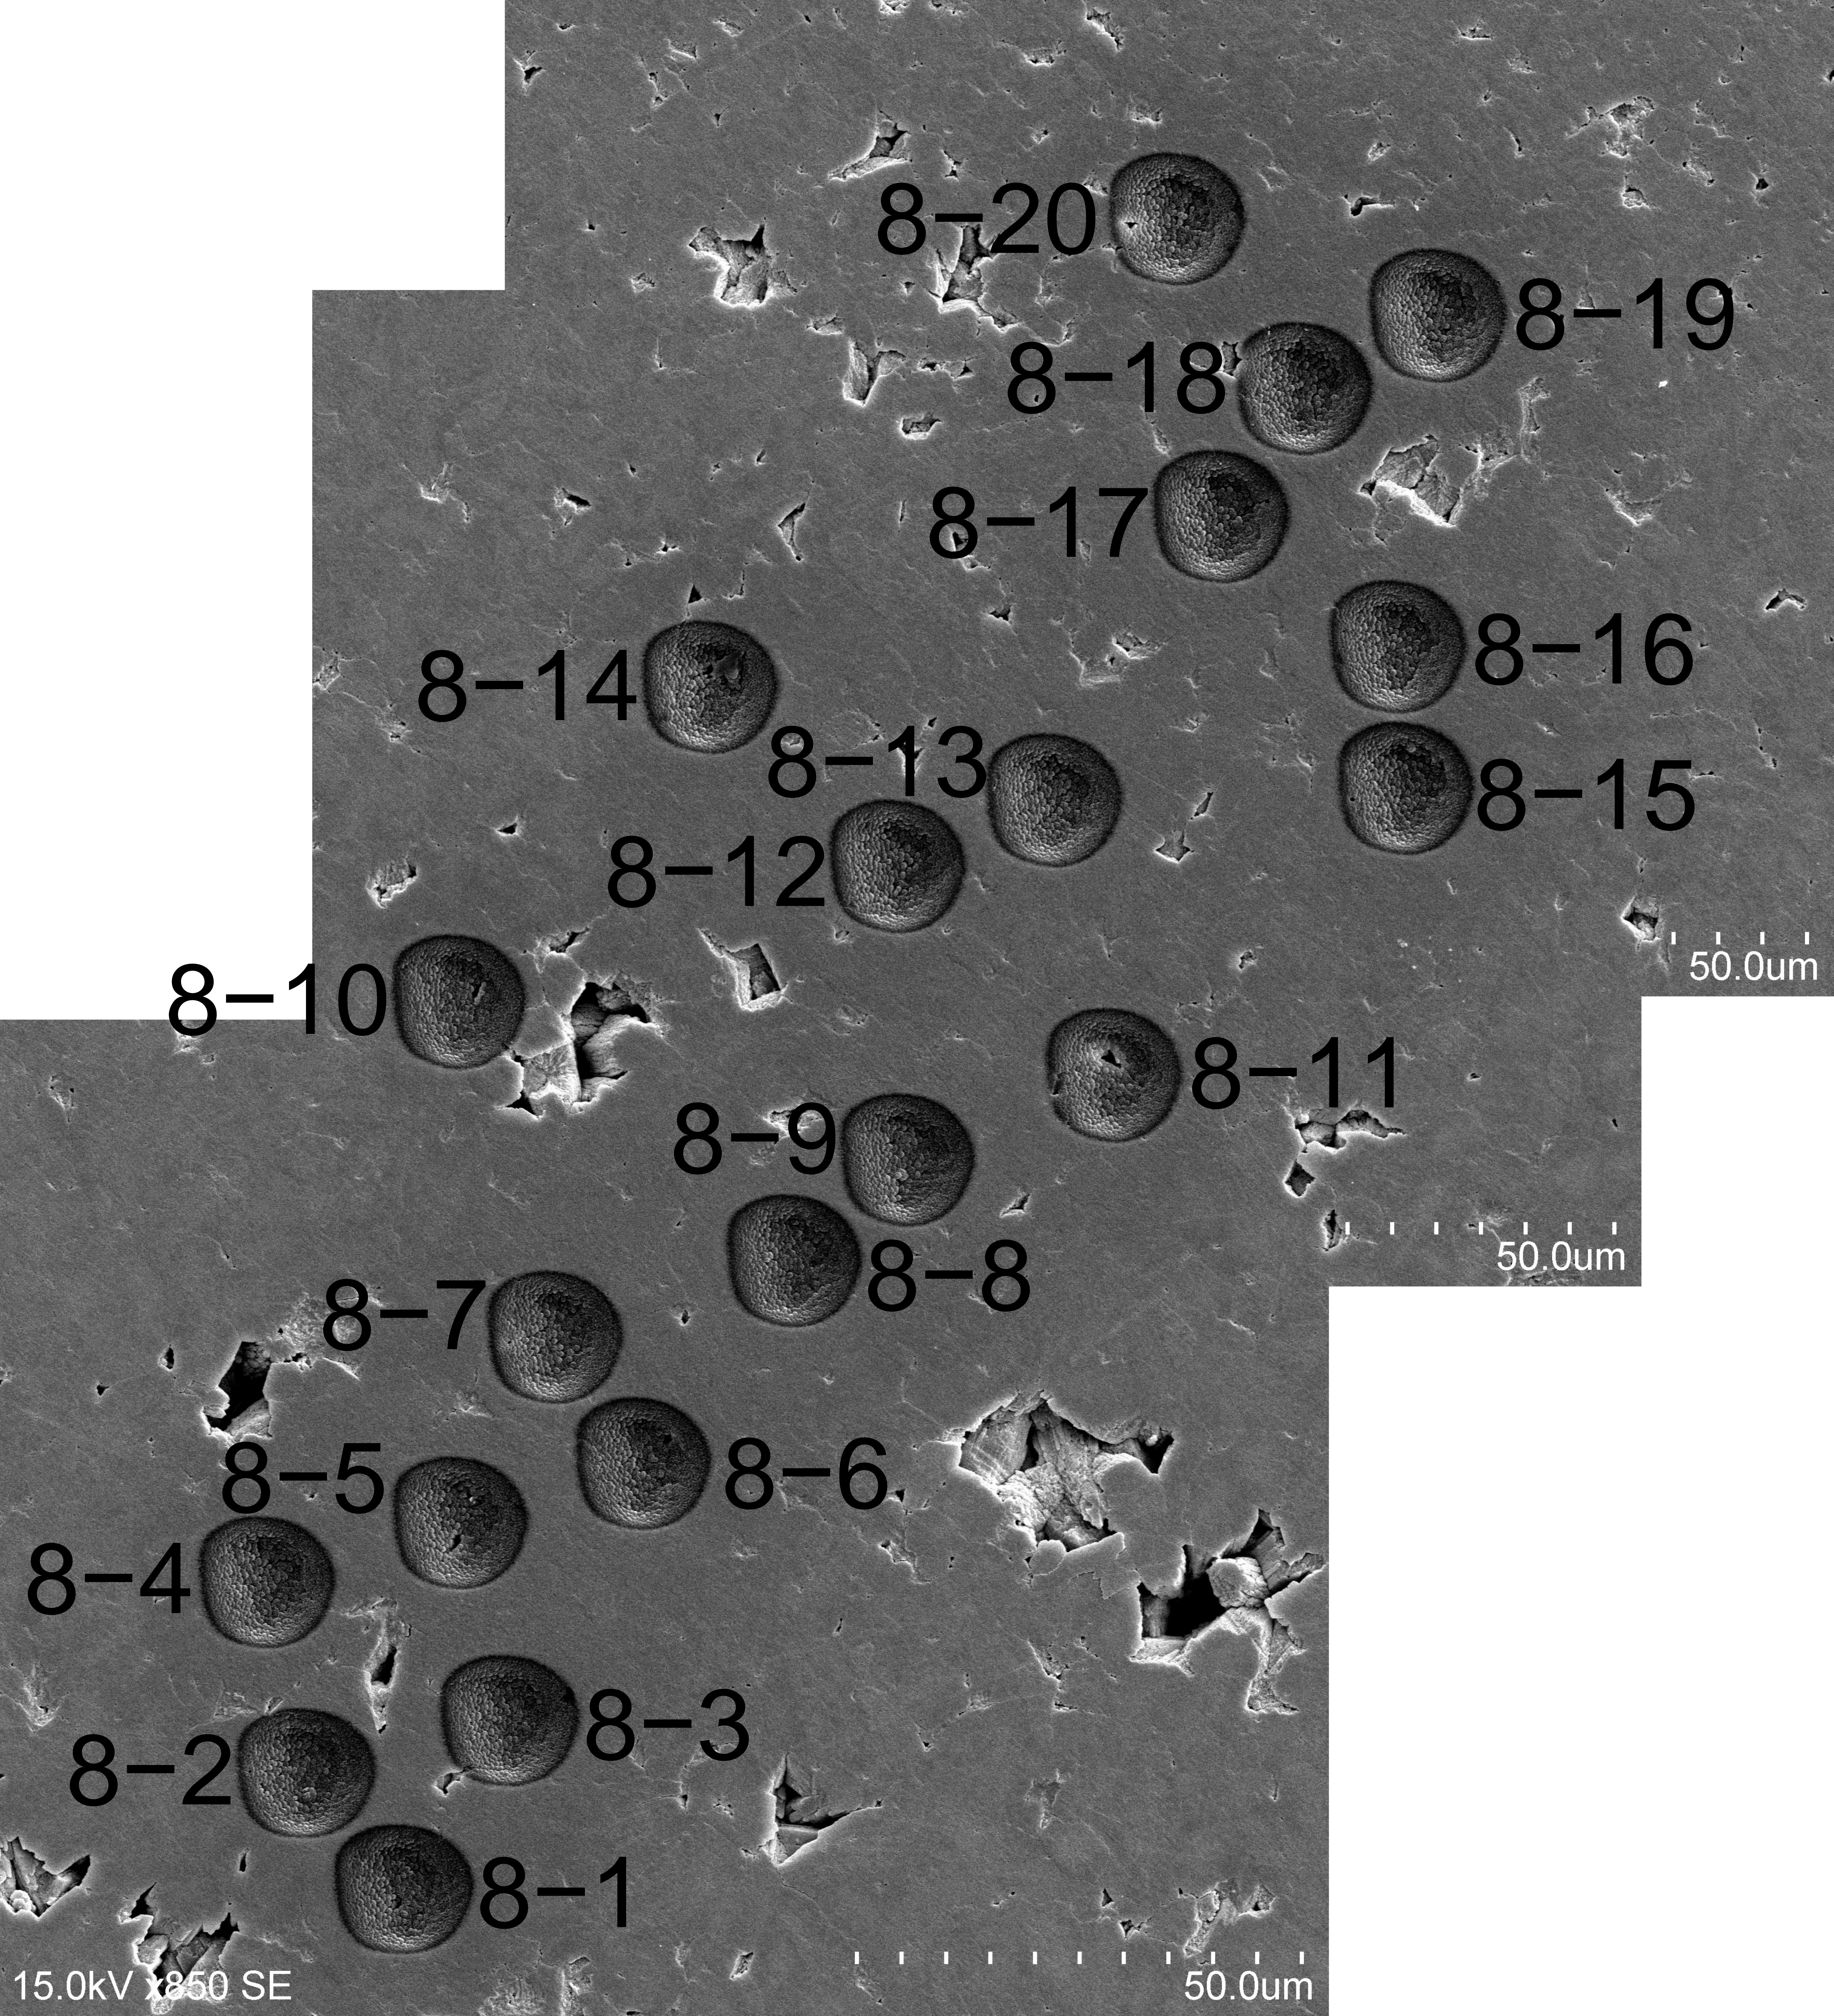

8-20

8-19

8-18

8-17

8-16

8-14

8-13

8-15

8-12

8-10

8-11

8-9

8-8

50.0um

8-7

8-5

8-6

8-4

8-2

8-3

8-1

50.0um

15.0kV x850 SE

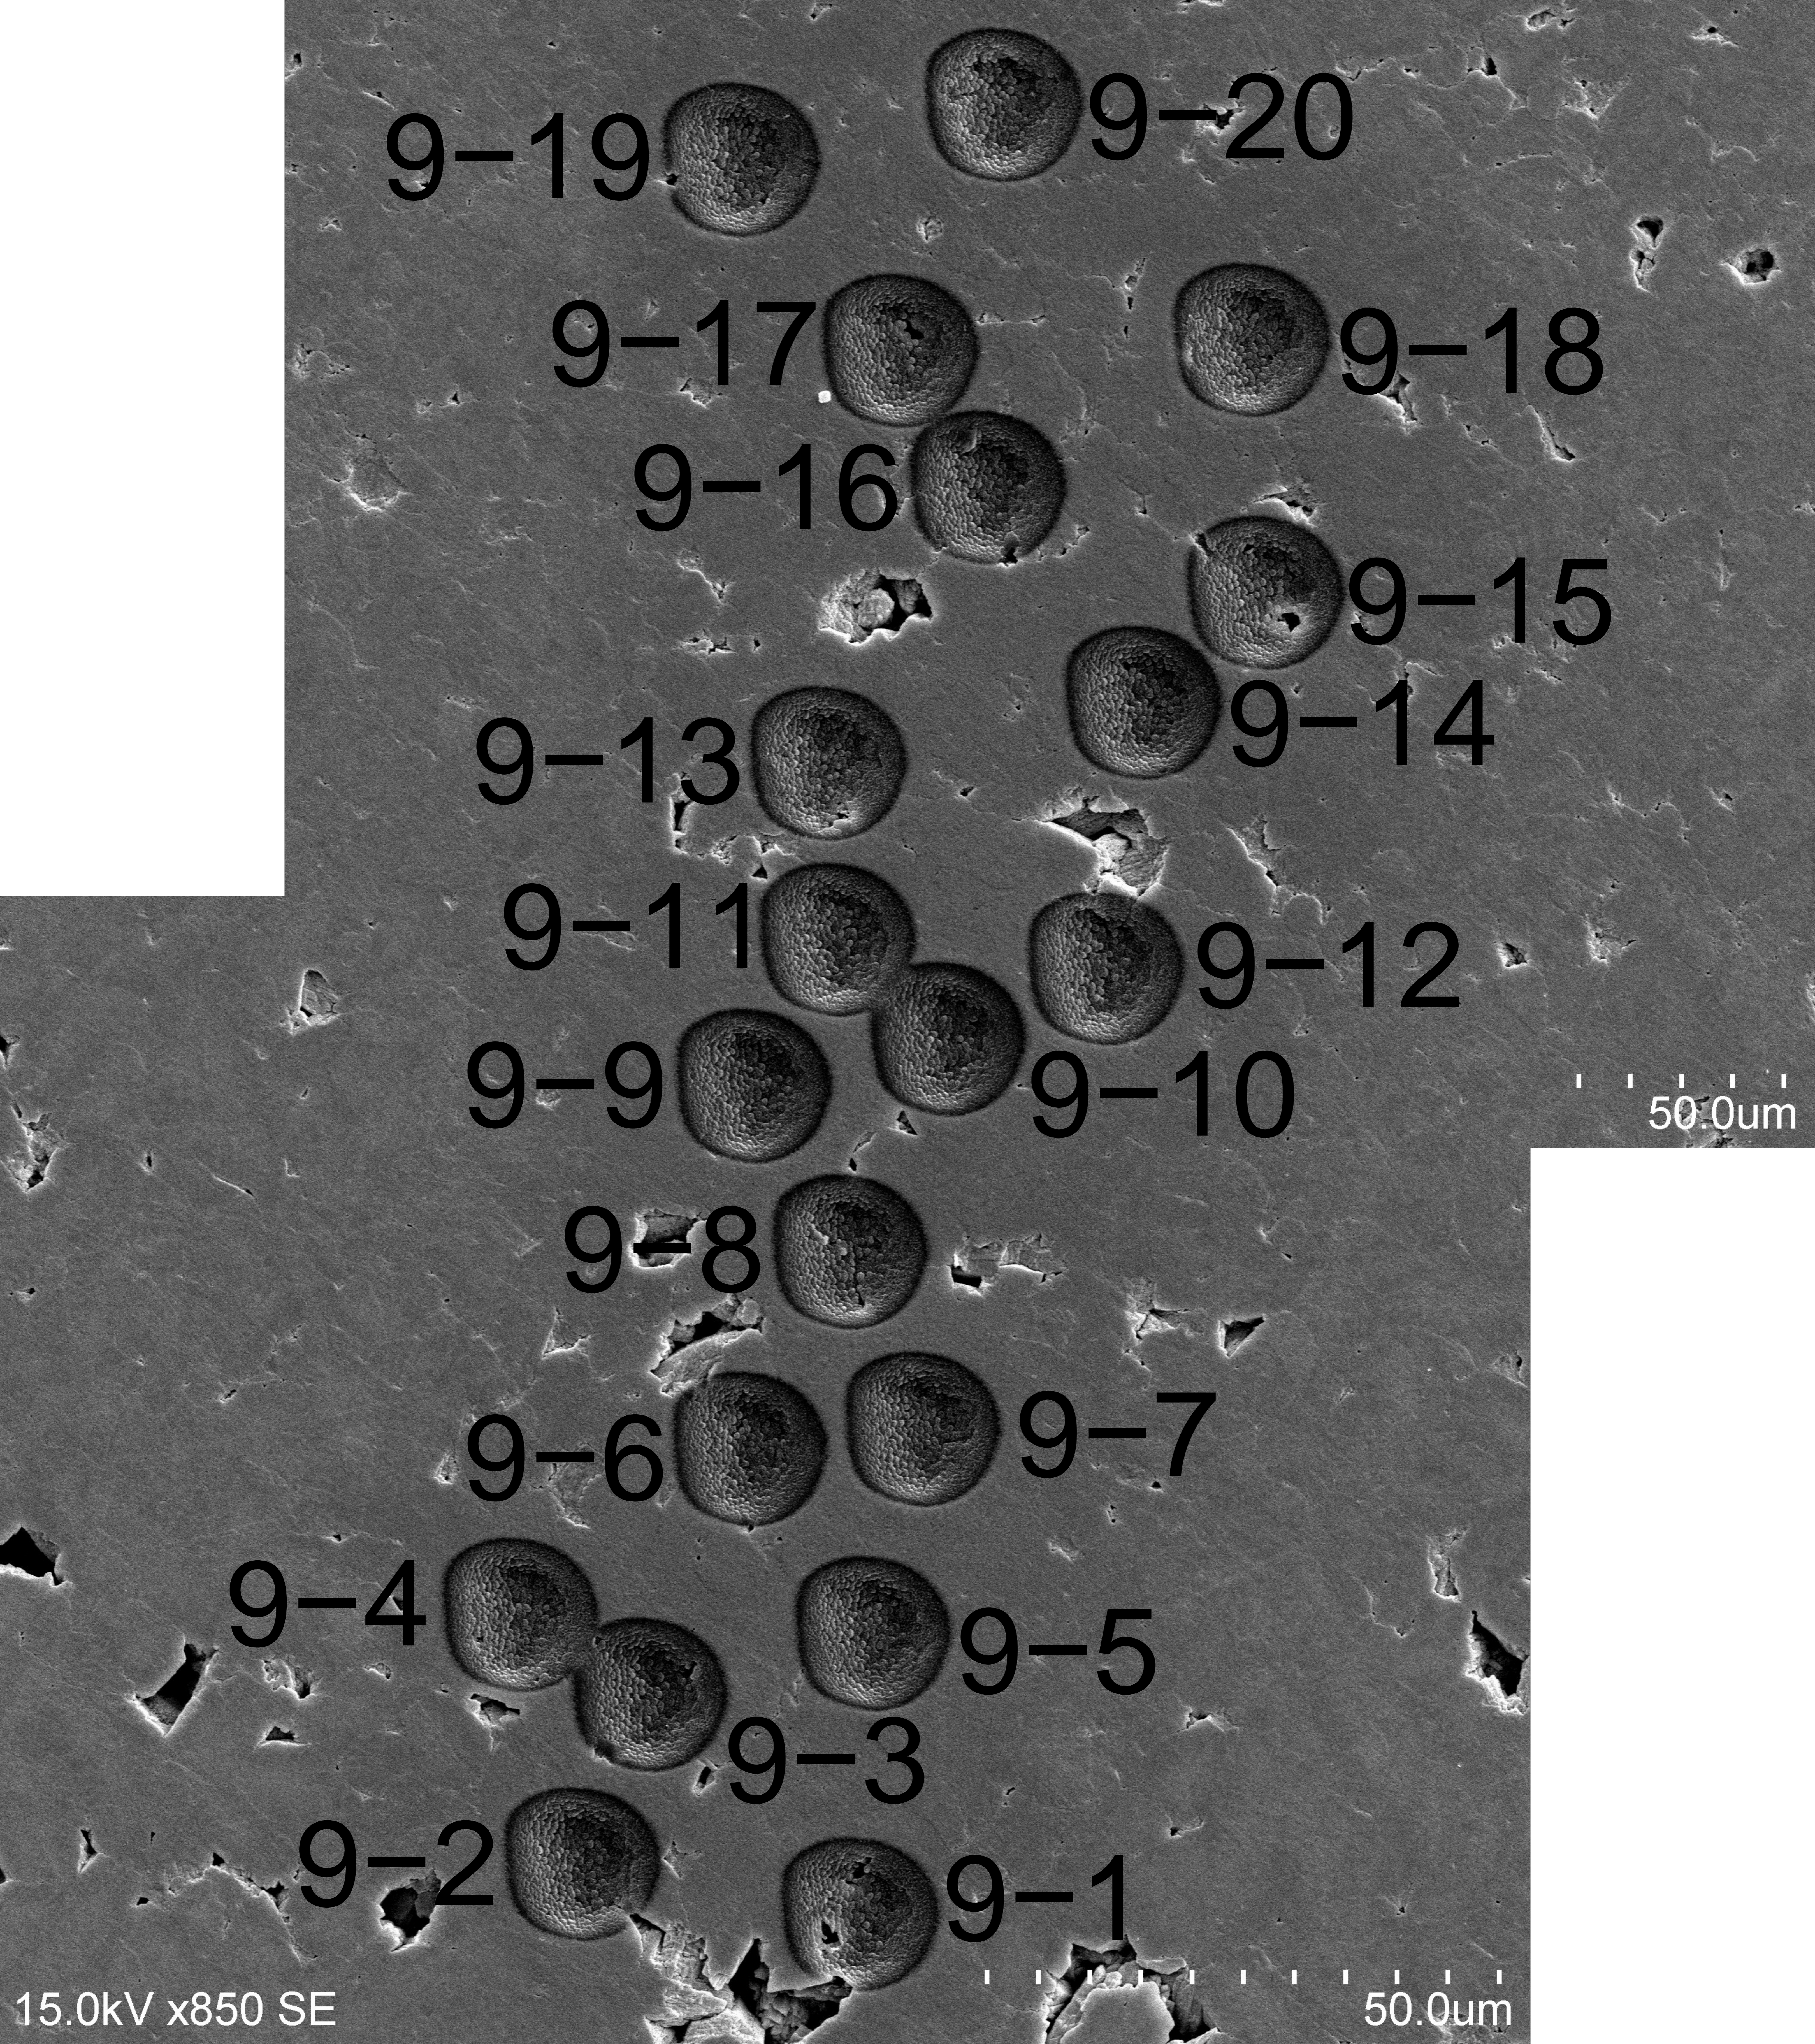

9-19 9-20

9-17 9-18

9-16 9-15

9-13 9-14

9-11 9-12

9-9 9-10

9-8 9-7

9-6 9-7

9-4 9-5

9-3

9-2 9-1

50.0um

50.0um

15.0kV x850 SE

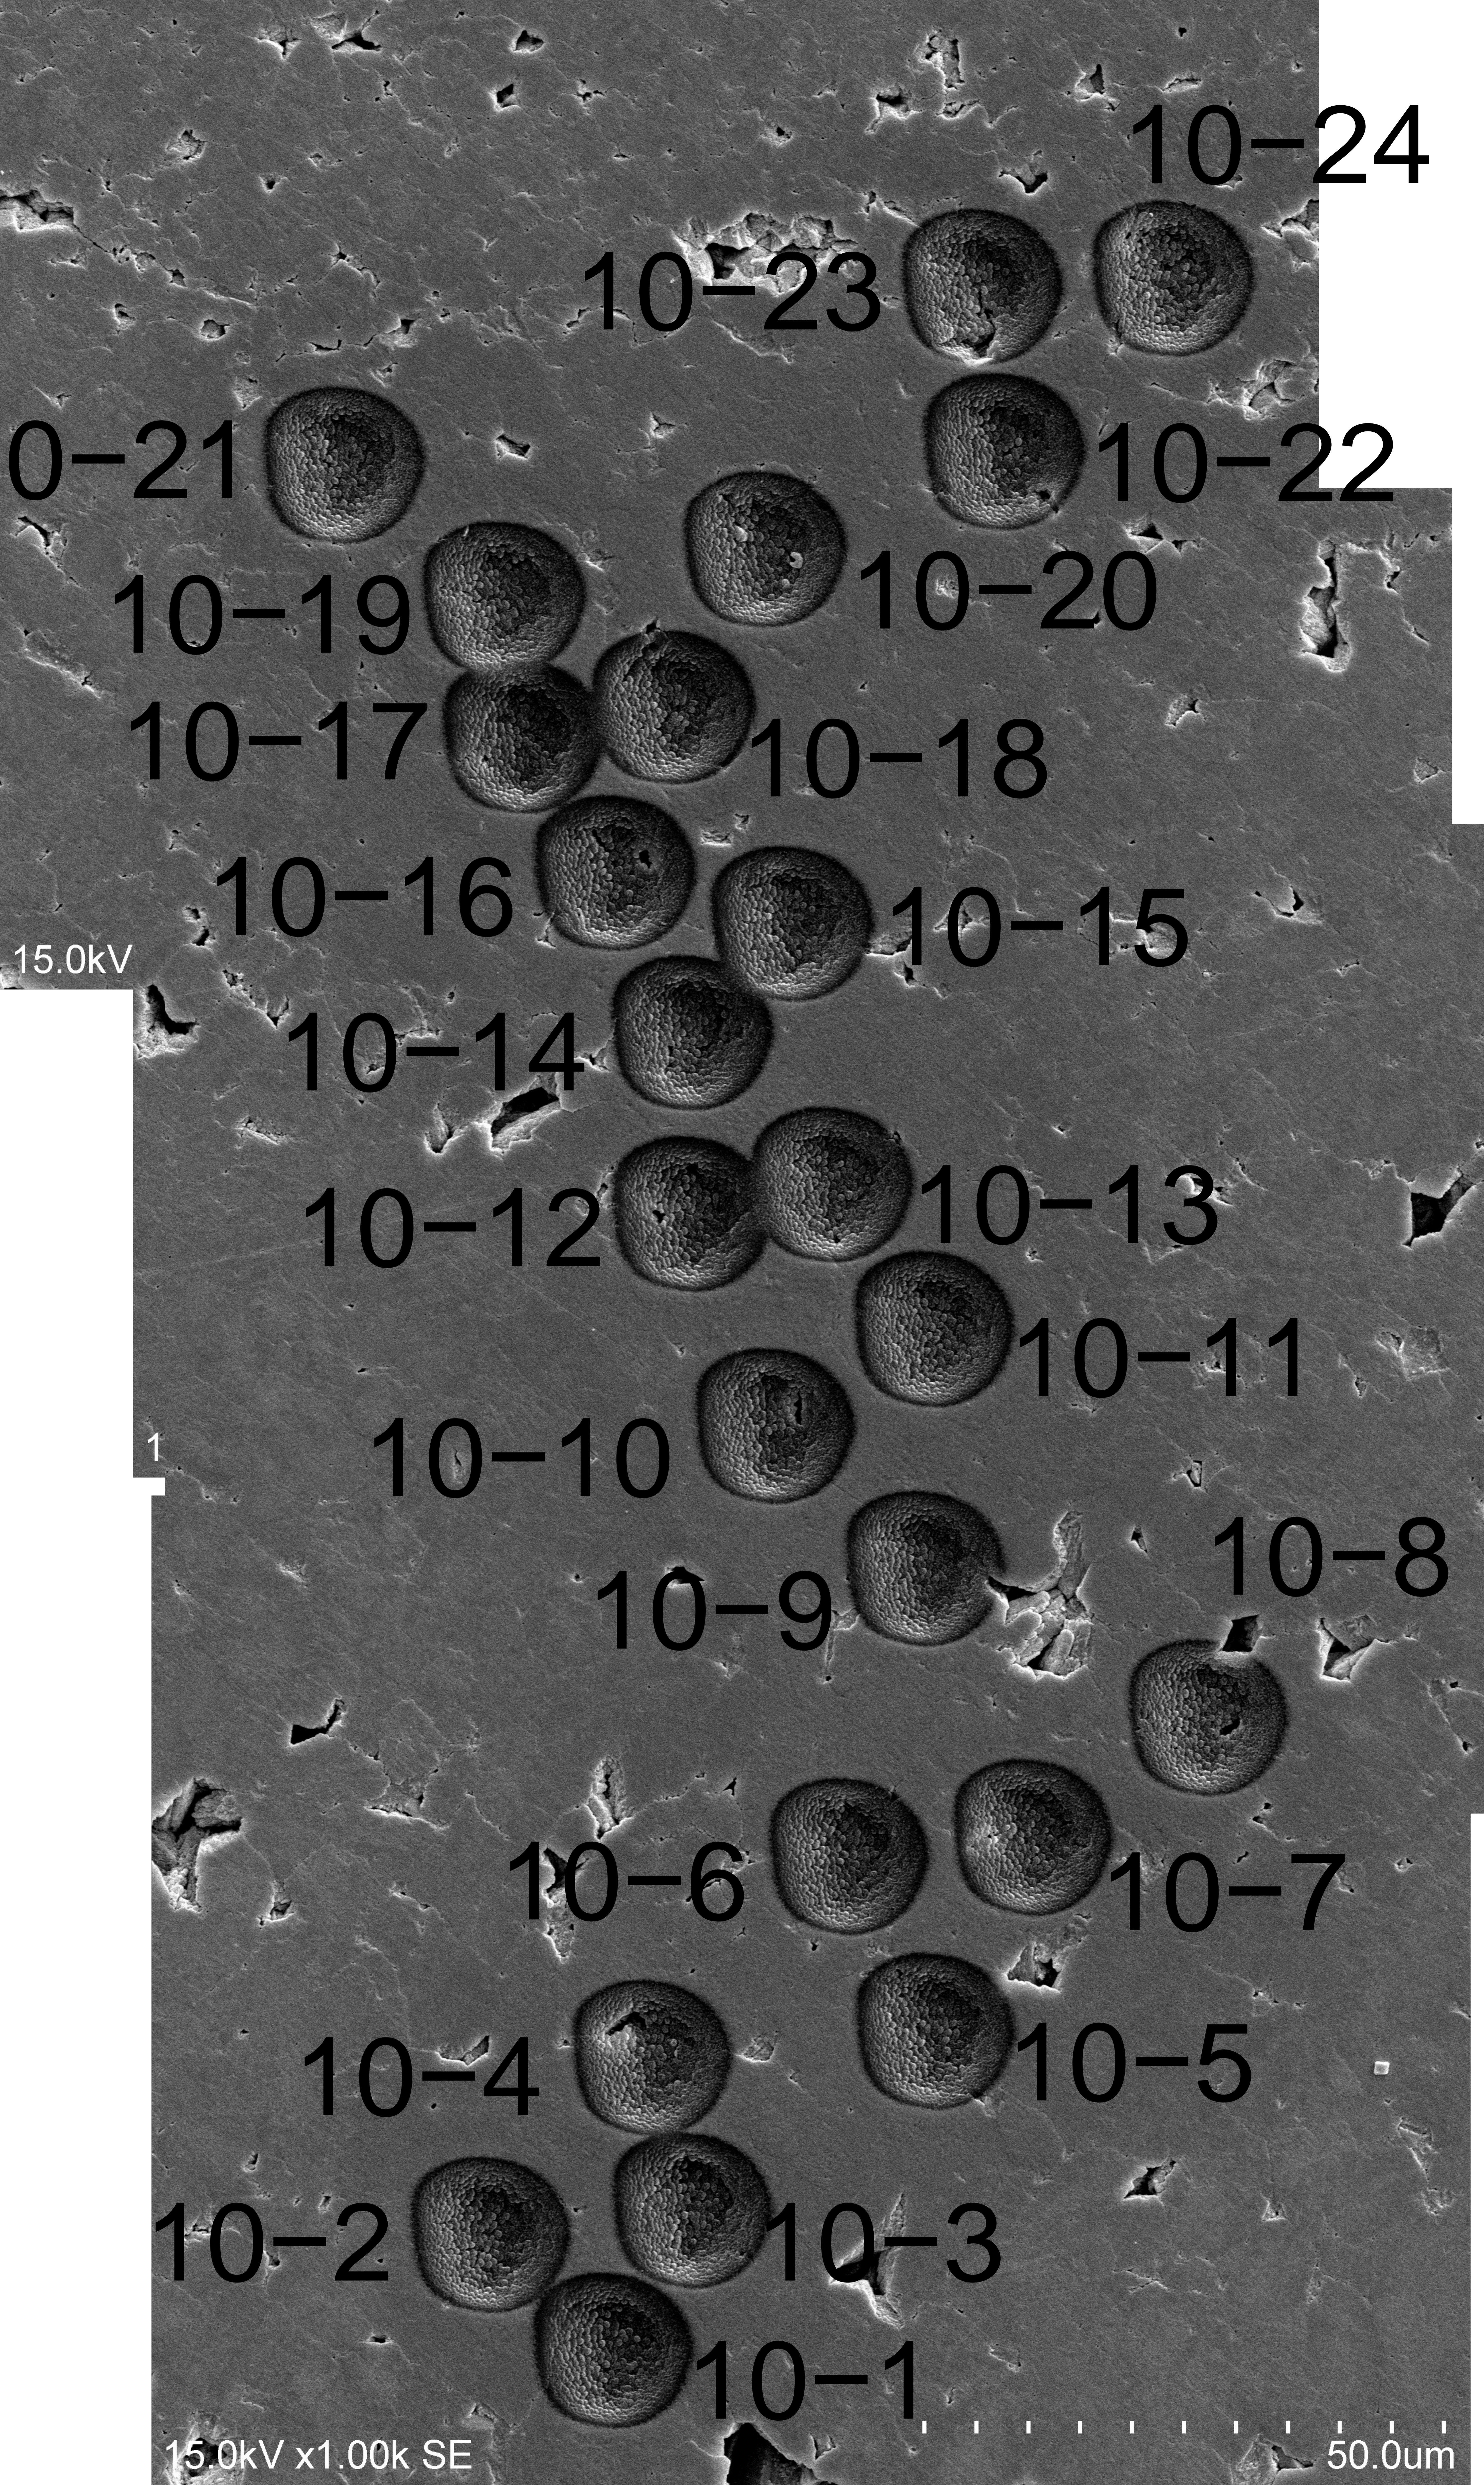

10-24

10-23

10-21

10-22

10-19

10-20

10-17

10-18

10-16

10-15

10-14

10-12

10-13

10-10

10-11

10-9

10-8

10-6

10-7

10-4

10-5

10-2

10-3

10-1

15.0kV

1

15.0kV x1.00k SE

50.0um

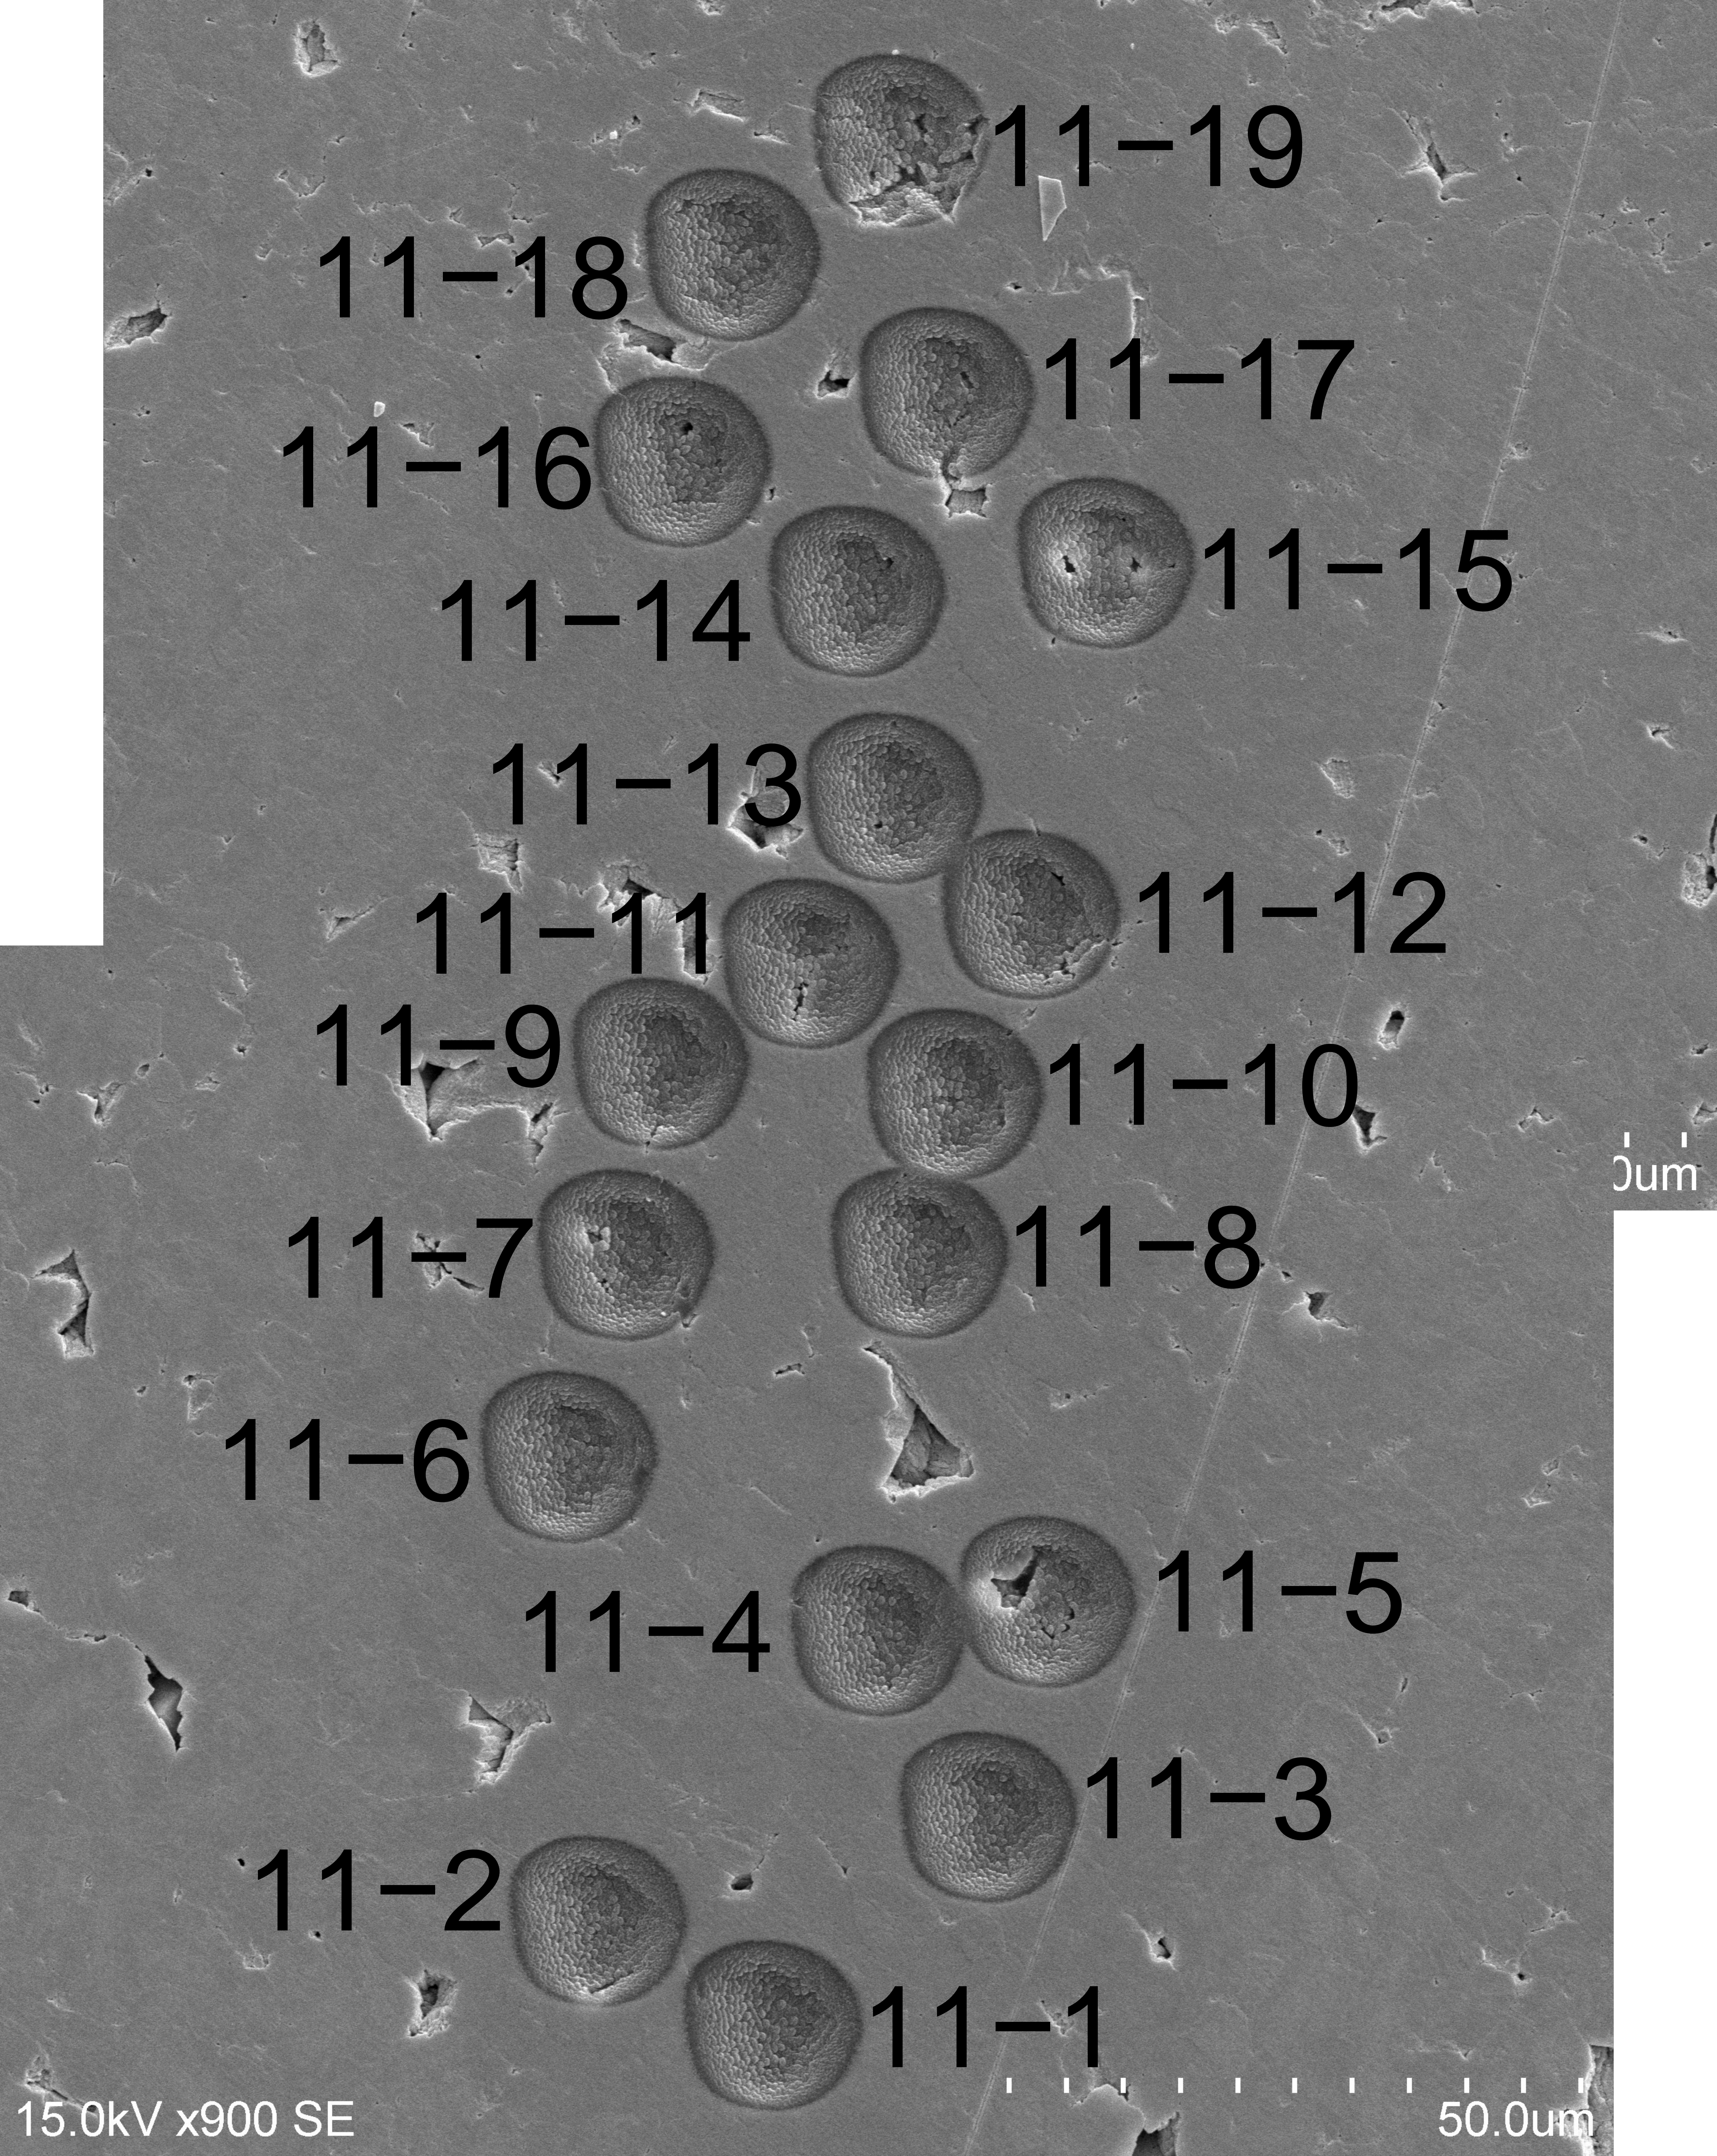

11-18

11-19

11-17

11-16

11-15

11-14

11-13

11-12

11-11

11-9

11-10

11-7

11-8

11-6

11-5

11-4

11-3

11-2

11-1

5um



12-8

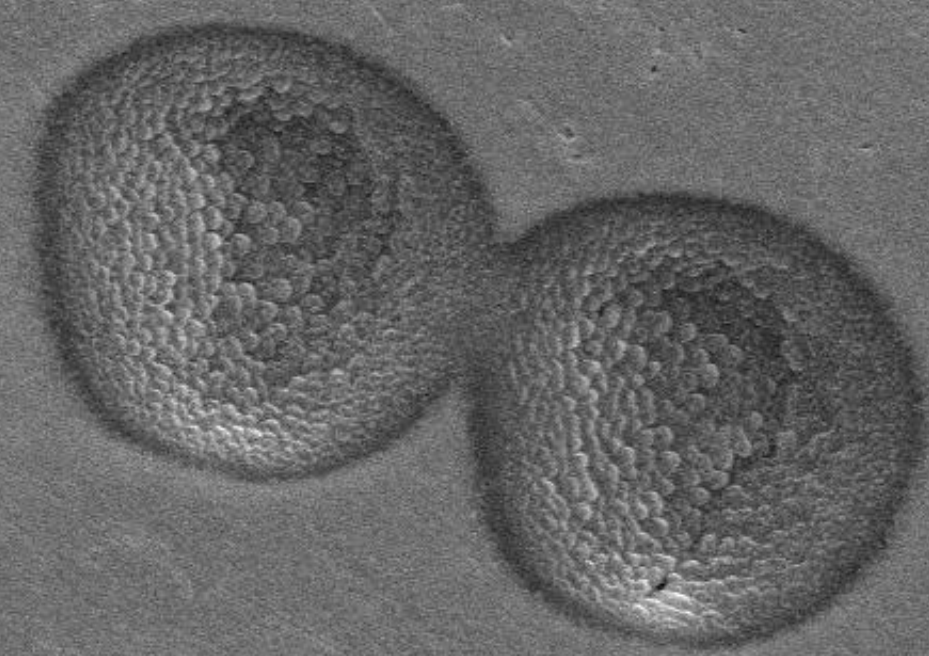

12-7

12-6

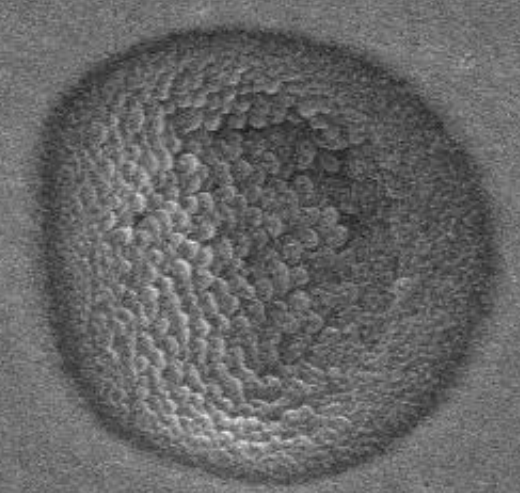

12-5

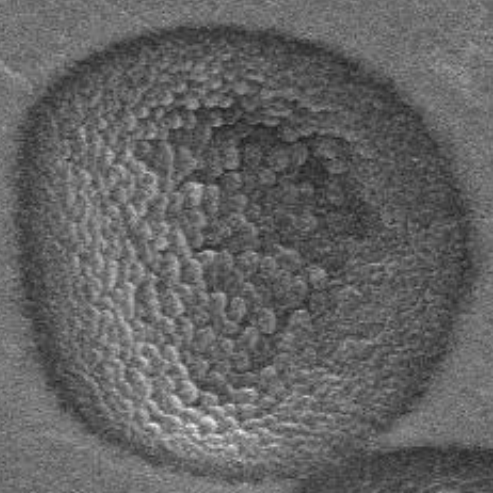

12-4

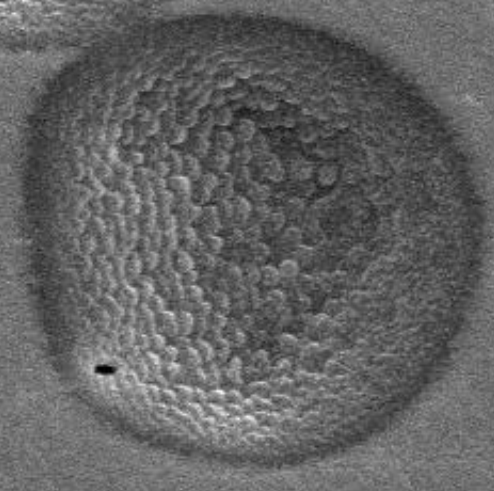

12-3

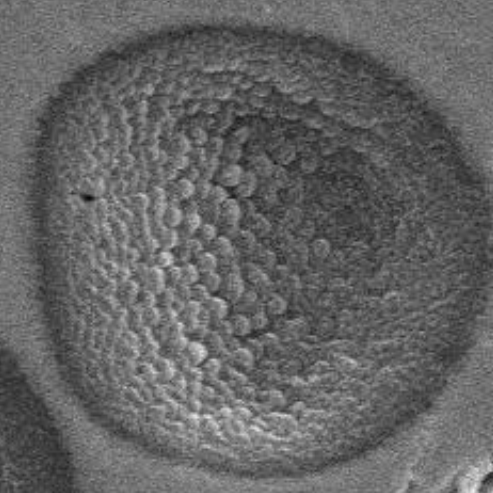

12-2

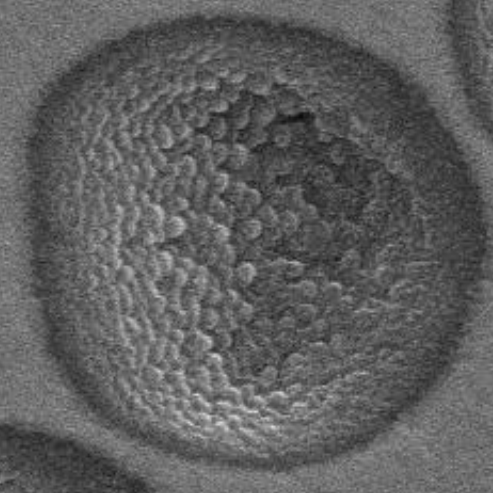

12-1

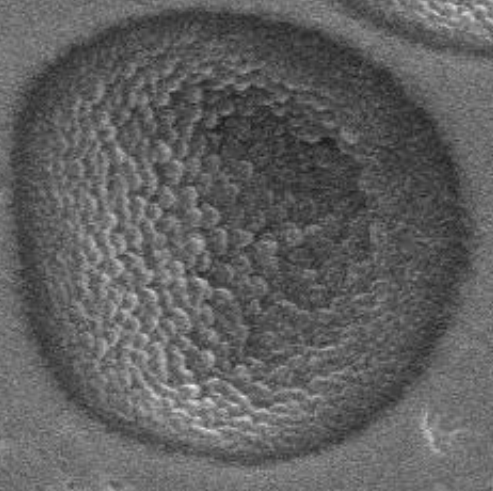

Supplement: pone.0153890.s001.pdf [file pone.0153890.s001.pdf]
