# Supplementary material for: Oxygen Isotope Variability within Nautilus Shell Growth Bands
Source: PLoS One. 2016 Apr 21;11(4):e0153890. doi: 10.1371/journal.pone.0153890 (PMC4839723; doi:10.1371/journal.pone.0153890)
Supplement: S1 Table — Complete data table of analyses in the outer prismatic layer of the wild-caught Nautilus macromphalus including bracketing standards and aragonite standard. (XLSX) [file pone.0153890.s003.xlsx]

## Sheet: Sheet1
Table S1: Ion microprobe raw and corrected oxygen isotope ratios from analyses of sample Nautilus macromphalus and standards.
						Precision		Precision				Primary Beam Current (nA)
Analysis#	Analysis Name	Pit Name	Arag δ18OVPDB (‰)ʕ	d18OVPDB (‰)*	d18OVSMOW (‰)	(2 s.d.)**	d18ORaw (‰)	(2s)†	IMF¥	date	time		16O- (109 cps)	Yield (109 cps/nA)	% UWC3 yieldV	Stage X (μm)	Stage Y (μm)	O16H1/O16	OHO-std €	Distance um Ψ	Pit Type Ϣ	Mineral Ю	CLFM Ѫ	Band Number	Pit Name
	UWC-3 STD = 12.49‰ VSMOW
	UW-Arg-7 = 19.73 ‰ VSMOW
	WI-STD-80
20140212@514.asc	UWC-3 WI-STD-80						9.11	0.349		2014-02-14	01:18:00	1.224	2.048	1.673		419	-153	0.000903277				C
20140212@515.asc	UWC-3 WI-STD-80						8.875	0.356		2014-02-14	01:21:00	1.222	2.043	1.671		440	-242	0.000864664				C
20140212@516.asc	UWC-3 WI-STD-80						8.841	0.378		2014-02-14	01:25:00	1.222	2.056	1.683		456	-223	0.000936848				C
20140212@517.asc	UWC-3 WI-STD-80						8.819	0.466		2014-02-14	01:29:00	1.222	2.047	1.675		432	-274	0.000914041				C
							8.911	0.269
20140212@518.asc	Arg 6510 #1						17.432	0.366		2014-02-14	01:33:00	1.217	1.947	1.601		-2238	-867	0.000997855	0.530125			A
20140212@519.asc	Arg 6510 #1						17.442	0.348		2014-02-14	01:36:00	1.217	1.944	1.598		-2187	-834	0.00100177	0.532207			A
20140212@520.asc	Arg 6510 #2						17.564	0.374		2014-02-14	01:40:00	1.216	1.935	1.591		-2982	-1081	0.000945687	0.50241			A
20140212@521.asc	Arg 6510 #3						16.861	0.274		2014-02-14	01:44:00	1.215	1.931	1.589		-2392	-1822	0.00382038	2.02963			A
							17.325	0.63
	NC-6
20140212@522.asc	UWC-3						8.641	0.283		2014-02-14	01:58:00	1.206	1.994	1.654		-1275	43	0.00281314				C
20140212@523.asc	UWC-3						8.523	0.393		2014-02-14	02:01:00	1.206	2.008	1.665		-1263	66	0.00281692				C
20140212@524.asc	UWC-3						8.562	0.366		2014-02-14	02:05:00	1.206	2	1.659		-1271	102	0.00296244				C
20140212@525.asc	UWC-3						8.832	0.394		2014-02-14	02:08:00	1.209	2.01	1.663		-1208	188	0.00284709				C
20140212@526.asc	UWC-3						8.66	0.309		2014-02-14	02:12:00	1.204	1.99	1.654		-1284	67	0.00291445				C
							8.64	0.239
20140212@527.asc	NC-6 T0-1	0-1	-0.71	-0.14	30.77	0.24	26.918	0.337		2/14/2014	02:17:00	1.197	1.923	1.607	97	-3715	2236	0.0152694	0.012225	23.65	1	A	1.61194	1	0-1
20140212@528.asc	NC-6 T0-2	0-2	0.04	0.61	31.54	0.24	27.689	0.305		2/14/2014	02:21:00	1.2	1.927	1.607	97	-3718	2250	0.0149188	0.0118743	36.206	1	A	1.42594	1	0-2
20140212@529.asc	NC-6 T0-3	0-3	-0.42	0.15	31.06	0.24	27.214	0.461		2/14/2014	02:25:00	1.2	1.924	1.603	96.7	-3739	2259	0.0152263	0.0121819	38	1	A	3.10954	1	0-3
20140212@530.asc	NC-6 T0-4	0-4	0.26	0.83	31.77	0.24	27.913	0.306		2/14/2014	02:29:00	1.2	1.911	1.592	96.1	-3684	2251	0.0150563	0.0120119	47.865	1	A	2.62275	1	0-4
20140212@531.asc	NC-6 T0-5	0-5	0.15	0.72	31.65	0.24	27.801	0.358		2/14/2014	02:34:00	1.198	1.918	1.602	96.7	-3732	2298	0.0139959	0.0109514	77.461	1	A	3.95737	2	0-5
20140212@532.asc	NC-6 T0-6	0-6	0.05	0.62	31.55	0.24	27.698	0.341		2/14/2014	02:40:00	1.199	1.921	1.603	96.7	-3665	2294	0.0153743	0.0123298	91.363	2	A	-4.18241	3	0-6
20140212@533.asc	NC-6 T0-7	0-7	0.36	0.93	31.87	0.24	28.017	0.339		2/14/2014	02:44:00	1.2	1.929	1.608	97	-3650	2304	0.0143357	0.0112913	106.609	1	A	4.03655	3	0-7
20140212@534.asc	NC-6 T0-8	0-8	0.01	0.58	31.5	0.24	27.652	0.326		2/14/2014	02:48:00	1.2	1.923	1.603	96.7	-3694	2323	0.0140293	0.0109849	108.852	1	A	4.28765	3	0-8
20140212@535.asc	NC-6 T0-9	0-9	0.08	0.65	31.58	0.24	27.731	0.455		2/14/2014	02:51:00	1.204	1.948	1.618	97.6	-3638	2326	0.0181055	0.0150611	126.789	1	A	-1.95476	4	0-9
20140212@536.asc	NC-6 T0-10	0-10	0.19	0.76	31.69	0.24	27.839	0.317		2/14/2014	02:56:00	1.207	1.939	1.606	96.9	-3686	2356	0.0144155	0.0113711	141.587	2	A	3.30413	4	0-10
20140212@537.asc	UWC-3						8.786	0.423		2014-02-14	03:00:00	1.207	1.995	1.653		-1246	43	0.00322211				C
20140212@538.asc	UWC-3						8.756	0.433		2014-02-14	03:03:00	1.199	1.981	1.651		-1284	23	0.00323499				C
20140212@539.asc	UWC-3						8.875	0.364		2014-02-14	03:07:00	1.199	1.989	1.659		-1302	50	0.00323358				C
20140212@540.asc	UWC-3						8.751	0.335		2014-02-14	03:10:00	1.198	1.985	1.656		-1305	22	0.00322516				C
	Bracket: average and 2SD						8.71	0.241	0.9963
20140212@541.asc	NC-6 T0-11	0-11	-0.24	0.33	31.25	0.45	27.627	0.326		2/14/2014	03:15:00	1.197	1.925	1.607	97.1	-3612	2348	0.0166257	0.0133032	153.848	2	A	-1.80192	5	0-11
20140212@542.asc	NC-6 T0-12	0-12	-1.06	-0.49	30.4	0.45	26.788	0.41		2/14/2014	03:18:00	1.197	1.939	1.619	97.8	-3626	2361	0.0155879	0.0122655	164.457	3	A	-2.49257	5	0-12
20140212@543.asc	NC-6 T0-13	0-13	-0.69	-0.12	30.78	0.45	27.163	0.384		2/14/2014	03:22:00	1.191	1.921	1.613	97.5	-3580	2356	0.0167718	0.0134493	172.529	2	A	1.78266	5	0-13
20140212@544.asc	NC-6 T0-14	0-14	0.34	0.91	31.85	0.45	28.229	0.334		2/14/2014	03:26:00	1.187	1.91	1.609	97.2	-3561	2362	0.0143872	0.0110647	184.188	2	A	-0.704722	5	0-14
20140212@545.asc	NC-6 T0-15	0-15	-0.11	0.46	31.39	0.45	27.769	0.321		2/14/2014	03:29:00	1.183	1.907	1.612	97.4	-3578	2373	0.0151409	0.0118184	187.327	2	A	0.221746	5	0-15
20140212@546.asc	NC-6 T0-16	0-16	-1.04	-0.47	30.42	0.45	26.804	0.386		2/14/2014	03:33:00	1.181	1.905	1.614	97.5	-3557	2384	0.0147143	0.0113919	203.022	4	A	1.24267	5	0-16
20140212@547.asc	NC-6 T0-17	0-17	-0.74	-0.17	30.74	0.45	27.119	0.411		2/14/2014	03:37:00	1.174	1.888	1.608	97.2	-3564	2408	0.0175033	0.0141808	223.65	5	A	-3.58112	6	0-17
20140212@548.asc	NC-6 T0-18	0-18	-0.47	0.1	31.01	0.45	27.393	0.317		2/14/2014	03:40:00	1.17	1.882	1.608	97.2	-3628	2426	0.0160206	0.0126981	222.305	2	A	-3.51412	6	0-18
20140212@549.asc	NC-6 T0-19	0-19	0.26	0.83	31.77	0.45	28.146	0.354		2/14/2014	03:44:00	1.178	1.895	1.609	97.2	-3598	2439	0.0141409	0.0108184	242.484	1	A	2.25206	6	0-19
20140212@550.asc	NC-6 T0-20	0-20	-0.08	0.49	31.42	0.45	27.797	0.285		2/14/2014	03:48:00	1.181	1.928	1.632	98.6	-3497	2402	0.0166197	0.0132972	238.896	2	A	-0.130212	6	0-20
20140212@551.asc	UWC-3						8.964	0.389		2014-02-14	03:52:00	1.175	1.933	1.646		-1187	32	0.00355269				C
20140212@552.asc	UWC-3						8.999	0.362		2014-02-14	03:55:00	1.167	1.924	1.649		-1188	10	0.00344198				C
20140212@553.asc	UWC-3						9.445	0.609		2014-02-14	03:59:00	1.155	1.892	1.638		-1197	-1	0.00344763				C
20140212@554.asc	UWC-3 CS-132						9.076	0.368		2014-02-14	04:05:00	1.211	2.033	1.679		-1157	55	0.00322171				C
20140212@555.asc	UWC-3						8.772	0.335		2014-02-14	04:09:00	1.241	2.069	1.666		-1190	-16	0.00324941				C
	Bracket: average and 2SD						8.936	0.449	0.9965
20140212@556.asc	NC-6 T1.5-1	1.5-1	-0.12	0.45	31.37	0.46	27.767	0.427		2/14/2014	04:14:00	1.25	1.98	1.584	95.3	-3504	2233	0.016732	0.013474	80.152	1	A	2.73142	2	1.5-1
20140212@557.asc	NC-6 T1.5-2	1.5-2	-0.74	-0.17	30.74	0.46	27.131	0.375		2/14/2014	04:18:00	1.256	2.014	1.603	96.4	-3493	2248	0.0173794	0.0141213	96.744	1	A	-2.5779	3	1.5-2
20140212@558.asc	NC-6 T1.5-3	1.5-3	-0.3	0.27	31.19	0.46	27.587	0.407		2/14/2014	04:21:00	1.259	2.011	1.597	96.1	-3476	2260	0.0164792	0.0132211	111.991	1	A	2.00443	3	1.5-3
20140212@559.asc	NC-6 T1.5-4	1.5-4	-0.09	0.48	31.41	0.46	27.802	0.466		2/14/2014	04:25:00	1.265	2.054	1.624	97.7	-3477	2280	0.0150803	0.0118222	133.515	4	A	1.55985	4	1.5-4
20140212@560.asc	NC-6 T1.5-5	1.5-5	0.12	0.69	31.62	0.46	28.012	0.414		2/14/2014	04:29:00	1.27	2.068	1.628	97.9	-3431	2263	0.0150537	0.0117956	130.376	2	A	-0.920359	4	1.5-5
20140212@561.asc	NC-6 T1.5-6	1.5-6	-0.79	-0.22	30.68	0.46	27.081	0.403		2/14/2014	04:33:00	1.273	2.043	1.606	96.6	-3412	2293	0.0188338	0.0155758	161.318	3	A	-0.093398	5	1.5-6
20140212@562.asc	NC-6 T1.5-7	1.5-7	-0.14	0.43	31.35	0.46	27.743	0.437		2/14/2014	04:36:00	1.271	2.041	1.606	96.6	-3422	2308	0.0153051	0.0120471	172.977	2	A	1.73638	5	1.5-7
20140212@563.asc	NC-6 T1.5-8	1.5-8	-0.56	0.01	30.92	0.46	27.317	0.435		2/14/2014	04:40:00	1.273	2.058	1.617	97.2	-3388	2319	0.0151068	0.0118488	192.26	2	A	1.67211	5	1.5-8
20140212@564.asc	NC-6 T1.5-9	1.5-9	-0.83	-0.26	30.64	0.46	27.041	0.405		2/14/2014	04:44:00	1.273	2.067	1.623	97.6	-3362	2322	0.0164667	0.0132086	201.677	2	A	0.820163	5	1.5-9
20140212@565.asc	NC-6 T1.5-10	1.5-10	-0.95	-0.38	30.52	0.46	26.916	0.372		2/14/2014	04:47:00	1.274	2.05	1.609	96.8	-3386	2345	0.0146191	0.0113611	216.923	4	A	0.495428	5	1.5-10
20140212@566.asc	UWC-3						8.948	0.315		2014-02-14	04:51:00	1.273	2.12	1.665		-1333	11	0.0030671				C
20140212@567.asc	UWC-3						8.537	0.373		2014-02-14	04:54:00	1.273	2.117	1.662		-1311	4	0.00313874				C
20140212@568.asc	UWC-3						8.834	0.37		2014-02-14	04:58:00	1.273	2.117	1.663		-1292	9	0.00316045				C
20140212@569.asc	UWC-3						8.964	0.389		2014-02-14	05:02:00	1.272	2.139	1.681		-1257	27	0.00314057				C
20140212@570.asc	UWC-3						8.958	0.391		2014-02-14	05:06:00	1.272	2.133	1.677		-1261	12	0.00316022				C
	Bracket: average and 2SD						8.95	0.462	0.9965
20140212@571.asc	NC-6 T5.5-1	5.5-1	-1.28	-0.71	30.18	0.34	26.386	0.404		2/14/2014	05:13:00	1.269	2.069	1.63	97.7	-419	1942	0.0196494	0.0165426	699.512	1	A	-5.82609	18	5.5-1
20140212@572.asc	NC-6 T5.5-2	5.5-2	-0.92	-0.35	30.55	0.34	26.757	0.418		2/14/2014	05:17:00	1.268	2.073	1.635	98.1	-428	1957	0.0164402	0.0133333	710.329	2	A	3.55371	18	5.5-2
20140212@573.asc	NC-6 T5.5-3	5.5-3	-0.84	-0.27	30.63	0.34	26.84	0.359		2/14/2014	05:21:00	1.269	2.068	1.63	97.7	-405	1967	0.0169047	0.0137979	723.7	1	A	1.71744	18	5.5-3
20140212@574.asc	NC-6 T5.5-3	5.5-3	-0.84	-0.27	30.63	0.34	26.84	0.359		2/14/2014	05:21:00	1.269	2.068	1.63	97.7	-405	1967	0.0169047	0.0137979	730.46	1	A	-1.5674	18	5.5-3
20140212@575.asc	NC-6 T5.5-5	5.5-5	-0.54	0.03	30.94	0.34	27.15	0.367		2/14/2014	05:30:00	1.27	2.086	1.643	98.5	-387	1992	0.0185567	0.0154499	752.996	2	A	2.85651	19	5.5-5
20140212@576.asc	NC-6 T5.5-6	5.5-6	-0.24	0.33	31.25	0.34	27.456	0.387		2/14/2014	05:33:00	1.268	2.057	1.622	97.3	-396	2004	0.0152011	0.0120943	762.761	1	A	2.85741	19	5.5-6
20140212@577.asc	NC-6 T5.5-7	5.5-7	-0.6	-0.03	30.88	0.34	27.083	0.386		2/14/2014	05:37:00	1.27	2.062	1.624	97.4	-336	1985	0.0188611	0.0157543	759.606	2	A	2.55952	19	5.5-7
20140212@578.asc	NC-6 T5.5-8	5.5-8	-0.73	-0.16	30.75	0.34	26.955	0.382		2/14/2014	05:41:00	1.271	2.072	1.631	97.8	-315	1997	0.0191627	0.0160558	773.728	2	A	-4.64478	20	5.5-8
20140212@579.asc	NC-6 T5.5-9	5.5-9	-0.47	0.1	31.02	0.34	27.223	0.355		2/14/2014	05:44:00	1.269	2.053	1.618	97	-329	2011	0.0158827	0.0127758	783.794	2	A	2.90947	20	5.5-9
20140212@580.asc	NC-6 T5.5-10	5.5-10	-0.42	0.15	31.07	0.34	27.272	0.399		2/14/2014	05:48:00	1.27	2.073	1.633	97.9	-291	2009	0.0170901	0.0139833	792.808	2	A	3.66786	20	5.5-10
20140212@581.asc	UWC-3						8.573	0.337		2014-02-14	05:52:00	1.272	2.119	1.666		-1335	-12	0.00300069				C
20140212@582.asc	UWC-3						8.739	0.445		2014-02-14	05:55:00	1.273	2.116	1.662		-1311	-15	0.00309572				C
20140212@583.asc	UWC-3						8.712	0.38		2014-02-14	05:59:00	1.271	2.13	1.676		-1288	-10	0.00310824				C
20140212@584.asc	UWC-3						8.614	0.443		2014-02-14	06:02:00	1.272	2.107	1.657		-1324	-32	0.00308989				C
	Bracket: average and 2SD						8.764	0.339	0.9963
20140212@585.asc	NC-6 T5.5-11	5.5-11	0.13	0.7	31.63	0.25	27.76	0.436		2/14/2014	06:07:00	1.268	2.01	1.586	95.3	68	1949	0.015522	0.0124894	840.583	1	A	0.458738	22	5.5-11
20140212@586.asc	NC-6 T5.5-12	5.5-12	-0.25	0.32	31.24	0.25	27.373	0.353		2/14/2014	06:10:00	1.267	2.009	1.586	95.4	86	1957	0.0141671	0.0111344	849.597	1	A	1.1595	22	5.5-12
20140212@587.asc	NC-6 T5.5-13	5.5-13	-0.43	0.14	31.06	0.25	27.189	0.483		2/14/2014	06:14:00	1.265	2.023	1.599	96.2	74	1975	0.0135291	0.0104965	866.423	1	A	3.0115	22	5.5-13
20140212@588.asc	NC-6 T5.5-14	5.5-14	-0.01	0.56	31.49	0.25	27.619	0.367		2/14/2014	06:18:00	1.263	2.03	1.607	96.6	75	1997	0.0141414	0.0111088	885.053	1	A	-3.60562	22	5.5-14
20140212@589.asc	NC-6 T5.5-15	5.5-15	-0.03	0.54	31.47	0.25	27.601	0.388		2/14/2014	06:21:00	1.264	2.026	1.603	96.4	117	1992	0.0136476	0.0106149	893.766	3	A	-0.449806	23	5.5-15
20140212@590.asc	NC-6 T6-1	6-1	0.1	0.67	31.61	0.25	27.735	0.385		2/14/2014	06:27:00	1.273	1.991	1.564	94.1	643	1770	0.0140502	0.0110176	843.588	3	A	1.90033	22	6-1
20140212@591.asc	NC-6 T6-2	6-2	-0.02	0.55	31.48	0.25	27.609	0.32		2/14/2014	06:30:00	1.272	2.031	1.596	96	617	1787	0.0155286	0.0124959	848.696	1	A	1.69519	22	6-2
20140212@592.asc	NC-6 T6-3	6-3	-0.02	0.55	31.48	0.25	27.611	0.481		2/14/2014	06:34:00	1.273	2.011	1.58	95	643	1787	0.014493	0.0114604	858.311	1	A	0.444214	22	6-3
20140212@593.asc	NC-6 T6-4	6-4	-0.07	0.5	31.42	0.25	27.552	0.404		2/14/2014	06:37:00	1.272	2.019	1.587	95.4	667	1799	0.014132	0.0110994	875.588	1	A	1.7523	22	6-4
20140212@594.asc	NC-6 T6-5	6-5	-0.65	-0.08	30.82	0.25	26.955	0.319		2/14/2014	06:41:00	1.272	2.016	1.585	95.3	674	1821	0.015018	0.0119854	897.672	3	A	3.01708	23	6-5
20140212@595.asc	UWC-3						8.957	0.344		2014-02-14	06:45:00	1.267	2.101	1.659		-1355	-19	0.00296136				C
20140212@596.asc	UWC-3						8.609	0.404		2014-02-14	06:48:00	1.263	2.097	1.661		-1345	-32	0.00304204				C
20140212@597.asc	UWC-3						8.721	0.402		2014-02-14	06:52:00	1.265	2.105	1.664		-1368	16	0.0029626				C
20140212@598.asc	UWC-3						8.603	0.341		2014-02-14	06:55:00	1.268	2.107	1.661		-1375	0	0.00300059				C
	Bracket: average and 2SD						8.691	0.249	0.9962
20140212@599.asc	NC-6 T6-6	6-6	-0.84	-0.27	30.63	0.41	26.956	0.367		2/14/2014	06:59:00	1.265	2.04	1.612	98.2	744	1824	0.0174317	0.0144531	922.011	2	A	0.993804	23	6-6
20140212@600.asc	NC-6 T6-7	6-7	-1.02	-0.45	30.45	0.41	26.77	0.363		2/14/2014	07:03:00	1.264	2.042	1.616	98.4	803	1821	0.0162293	0.0132506	937.935	1	A	-1.69581	24	6-7
20140212@601.asc	NC-6 T6-8	6-8	-0.27	0.3	31.22	0.41	27.541	0.331		2/14/2014	07:07:00	1.261	2.037	1.615	98.3	736	1858	0.0150972	0.0121185	950.856	1	A	3.56122	24	6-8
20140212@602.asc	NC-6 T6-9	6-9	-0.58	-0.01	30.9	0.41	27.224	0.316		2/14/2014	07:10:00	1.261	2.043	1.62	98.6	769	1862	0.0160579	0.0130792	964.377	2	A	-3.09421	25	6-9
20140212@603.asc	NC-6 T6-10	6-10	-0.58	-0.01	30.9	0.41	27.226	0.364		2/14/2014	07:14:00	1.262	2.05	1.624	98.9	793	1872	0.0172249	0.0142462	980.602	3	A	2.60794	25	6-10
20140212@604.asc	NC-6 T6-11	6-11	-0.42	0.15	31.07	0.41	27.391	0.343		2/14/2014	07:17:00	1.258	2.043	1.624	98.9	808	1879	0.0149023	0.0119236	992.621	1	A	-2.44277	25	6-11
20140212@605.asc	NC-6 T6-12	6-12	-0.88	-0.31	30.59	0.41	26.911	0.443		2/14/2014	07:21:00	1.254	2.051	1.636	99.6	816	1891	0.0176766	0.014698	1007.04	3	A	-1.07089	26	6-12
20140212@606.asc	NC-6 T6-13	6-13	-0.33	0.24	31.15	0.41	27.474	0.407		2/14/2014	07:26:00	1.264	2.066	1.634	99.5	810	1908	0.0146175	0.0116389	1020.26	1	A	3.4693	26	6-13
20140212@607.asc	NC-6 T6-14	6-14	-0.36	0.21	31.12	0.41	27.443	0.403		2/14/2014	07:32:00	1.261	2.062	1.635	99.5	831	1905	0.0156073	0.0126286	1025.07	2	A	1.32488	26	6-14
20140212@608.asc	NC-6 T6-15	6-15	-0.79	-0.22	30.68	0.41	27.002	0.371		2/14/2014	07:36:00	1.257	2.035	1.619	98.6	813	1923	0.0141974	0.0112188	1036.79	3	A	-0.963643	27	6-15
20140212@609.asc	NC-6 T6-16	6-16	-0.52	0.05	30.97	0.41	27.288	0.324		2/14/2014	07:40:00	1.258	2.056	1.634	99.4	834	1924	0.0133437	0.0103651	1042.5	2	A	-2.40582	27	6-16
20140212@610.asc	UWC-3						8.932	0.409		2014-02-14	07:47:00	1.257	2.067	1.645		-1313	106	0.00294224				C
20140212@611.asc	UWC-3						8.958	0.324		2014-02-14	07:53:00	1.25	1.995	1.596		-1312	80	0.00300797				C
20140212@612.asc	UWC-3						8.839	0.363		2014-02-14	07:56:00	1.247	2.064	1.655		-1332	97	0.00293958				C
20140212@613.asc	UWC-3						9.201	0.463		2014-02-14	08:00:00	1.248	1.986	1.592		-1351	90	0.00297148				C
20140212@614.asc							9.079	0.396		2014-02-14	08:04:00	1.254	2.072	1.653		-1371	36	0.00298001				C
	Bracket: average and 2SD						8.878	0.409	0.9964
	Sample Change: WI-STD 80
20140212@773.asc	UWC-3 #1						9.414	0.383		2014-02-14	20:20:00	1.174	1.947	1.658	0	24	-271	0.00149893				C
20140212@774.asc	UWC-3 #1 Cs-134						9.409	0.343		2014-02-14	20:24:00	1.204	2.026	1.683	0	25	-292	0.00146238				C
20140212@775.asc	UWC-3 #1						9.213	0.364		2014-02-14	20:28:00	1.238	2.062	1.666	0	55	-282	0.00142479				C
20140212@776.asc	UWC-3 #1						9.253	0.246		2014-02-14	20:32:00	1.243	2.074	1.668	0	47	-328	0.00139536				C
20140212@777.asc	UW Arg 6510 #2						17.502	0.304		2014-02-14	20:36:00	1.245	1.988	1.597	95.7	-2967	-1007	0.00138541	-7.279e-06			A
20140212@778.asc	UW Arg 6510 #2						17.703	0.376		2014-02-14	20:39:00	1.245	1.986	1.596	95.7	-3023	-993	0.00138009	-6.18767e-06			A
20140212@779.asc	UW Arg 6510 #2						17.945	0.329		2014-02-14	20:43:00	1.248	1.981	1.588	95.2	-2986	-976	0.00139427	1.67806e-05			A
20140212@780.asc	UW Arg 6510 #1						17.624	0.261		2014-02-14	20:47:00	1.246	1.991	1.598	95.8	-2001	-852	0.00143329	5.7514e-05			A
20140212@781.asc	UW Arg 6510 #1						17.761	0.356		2014-02-14	20:50:00	1.246	1.991	1.598	95.8	-1927	-820	0.00142577	3.91833e-05			A
20140212@782.asc	UW Arg 6510 #1						17.789	0.432		2014-02-14	20:53:00	1.247	1.989	1.596	95.7	-1906	-873	0.00142211	-9.23116e-05			A
20140212@783.asc	UWC-3 #1;						9.227	0.46		2014-02-14	20:57:00	1.249	2.08	1.665		-14	-296	0.00132495				C
20140212@784.asc	UWC-3 #1						9.189	0.392		2014-02-14	21:01:00	1.248	2.084	1.669		-4	-320	0.00135324				C
20140212@785.asc	UWC-3 #1						9.356	0.292		2014-02-14	21:04:00	1.246	2.08	1.669		14	-347	0.00133962				C
20140212@786.asc	UWC-3 #1						9.376	0.361		2014-02-14	21:08:00	1.247	2.074	1.662		47	-359	0.00134225				C
	Bracket						9.305	0.187	0.9869
	Sample Change: NC-6
20140212@787.asc	UWC-3						9.029	0.446		2014-02-14	21:18:00	1.244	2.081	1.672		-502	53	0.00197908				C
20140212@788.asc	UWC-3						9.173	0.394		2014-02-14	21:21:00	1.246	2.072	1.663		-478	30	0.00197402				C
20140212@789.asc	UWC-3						9.434	0.299		2014-02-14	21:25:00	1.249	2.073	1.66		-497	28	0.00198575				C
20140212@790.asc	UWC-3						9.327	0.348		2014-02-14	21:28:00	1.249	2.076	1.661		-501	2	0.00201452				C
20140212@791.asc	UWC-3						9.218	0.426		2014-02-14	21:32:00	1.249	2.073	1.659		-517	19	0.00204027				C
20140212@792.asc	NC-6 T7-1	7-1	-0.53	0.04	30.95	0.25	27.599	0.365		2/14/2014	21:41:00	1.245	2.003	1.609	97.5	1385	1642	0.0134359	0.0113485	938.837	1	A	-1.34365	24	7-1
20140212@793.asc	NC-6 T7-2	7-2	-0.02	0.55	31.47	0.25	28.116	0.39		2/14/2014	21:44:00	1.242	1.971	1.587	96.1	1372	1656	0.0128886	0.0108012	945.447	3	A	1.93063	24	7-2
20140212@794.asc	NC-6 T7-3	7-3	0.08	0.65	31.58	0.25	28.222	0.436		2/14/2014	21:48:00	1.251	2.009	1.606	97.3	1363	1666	0.0136439	0.0115566	953.26	1	A	2.56033	24	7-3
20140212@795.asc	NC-6 T7-4	7-4	-0.65	-0.08	30.82	0.25	27.469	0.331		2/14/2014	21:52:00	1.261	2.024	1.605	97.2	1390	1678	0.0138815	0.0117941	971.889	2	A	-2.147	25	7-4
20140212@796.asc	NC-6 T7-5	7-5	-0.41	0.16	31.08	0.25	27.721	0.3		2/14/2014	21:55:00	1.259	2.02	1.604	97.2	1407	1686	0.0158853	0.0137979	984.508	1	A	4.87755	25	7-5
20140212@797.asc	NC-6 T7-6	7-6	-0.35	0.22	31.14	0.25	27.783	0.303		2/14/2014	21:59:00	1.261	2.031	1.611	97.6	1387	1702	0.0165162	0.0144289	994.124	1	A	-3.60231	25	7-6
20140212@798.asc	NC-6 T7-7	7-7	-0.48	0.09	31	0.25	27.645	0.432		2/14/2014	22:03:00	1.261	2.027	1.608	97.4	1407	1707	0.0141958	0.0121085	1005.54	1	A	-1.61449	26	7-7
20140212@799.asc	NC-6 T7-8	7-8	-0.75	-0.18	30.72	0.25	27.367	0.442		2/14/2014	22:06:00	1.26	1.992	1.581	95.7	1401	1725	0.0154573	0.0133699	1020.26	3	A	3.4693	26	7-8
20140212@800.asc	NC-6 T7-9	7-9	0.1	0.67	31.6	0.25	28.242	0.346		2/14/2014	22:10:00	1.26	2.011	1.596	96.7	1465	1698	0.0126889	0.0106015	1021.32	1	A	3.16322	26	7-9
20140212@801.asc	NC-6 T7-10	7-10	-0.52	0.05	30.96	0.25	27.606	0.322		2/14/2014	22:14:00	1.258	2.02	1.605	97.2	1411	1737	0.0135657	0.0114783	1034.69	1	A	-1.12572	26	7-10
20140212@802.asc	UWC-3						9.234	0.319		2014-02-14	22:18:00	1.256	2.05	1.632		-628	-4	0.00216735				C
20140212@803.asc	UWC-3						9.113	0.343		2014-02-14	22:21:00	1.256	2.056	1.637		-621	-26	0.00218559				C
20140212@804.asc	UWC-3						9.165	0.41		2014-02-14	22:24:00	1.255	2.052	1.635		-652	-12	0.00220068				C
20140212@805.asc	UWC-3						9.066	0.372		2014-02-14	22:28:00	1.254	2.056	1.64		-645	-38	0.00223919				C
	Bracket						9.195	0.254	0.9967
20140212@806.asc	NC-6 T7-11	7-11	-0.57	0	30.91	0.16	27.557	0.37		2/14/2014	22:32:00	1.257	2.018	1.605	98.2	1379	1755	0.0134579	0.0112114	1041	1	A	-2.68717	27	7-11
20140212@807.asc	NC-6 T7-12	7-12	0.09	0.66	31.59	0.16	28.238	0.32		2/14/2014	22:35:00	1.257	2.012	1.6	97.9	1412	1752	0.0125741	0.0103276	1048.81	1	A	1.34527	27	7-12
20140212@808.asc	NC-6 T7-13	7-13	-1.06	-0.49	30.4	0.16	27.054	0.255		2/14/2014	22:39:00	1.256	2.056	1.636	100.1	1442	1751	0.01396	0.0117134	1054.82	3	A	2.69083	27	7-13
20140212@809.asc	NC-6 T7-14	7-14	-0.26	0.31	31.23	0.16	27.875	0.337		2/14/2014	22:43:00	1.256	2.023	1.61	98.5	1429	1772	0.0151377	0.0128911	1072.25	1	A	-2.20957	28	7-14
20140212@810.asc	NC-6 T7-15	7-15	-0.44	0.13	31.04	0.16	27.69	0.428		2/14/2014	22:47:00	1.256	2.035	1.62	99.1	1448	1771	0.0142622	0.0120157	1077.05	1	A	-0.50997	28	7-15
20140212@811.asc	NC-6 T7-16	7-16	-0.3	0.27	31.19	0.16	27.838	0.418		2/14/2014	22:50:00	1.255	2.022	1.611	98.6	1430	1786	0.0150102	0.0127637	1085.47	1	A	1.26634	28	7-16
20140212@812.asc	NC-6 T7-17	7-17	-0.26	0.31	31.23	0.16	27.876	0.324		2/14/2014	22:54:00	1.252	2.011	1.606	98.2	1456	1785	0.0147371	0.0124906	1093.28	3	A	0.756904	28	7-17
20140212@813.asc	NC-6 T7-18	7-18	-0.83	-0.26	30.64	0.16	27.289	0.241		2/14/2014	22:57:00	1.251	2.01	1.607	98.3	1437	1805	0.0126168	0.0103703	1104.7	1	A	-1.9696	29	7-18
20140212@814.asc	NC-6 T7-19	7-19	-0.65	-0.08	30.83	0.16	27.477	0.293		2/14/2014	23:01:00	1.249	2.016	1.614	98.7	1449	1813	0.0136428	0.0113963	1117.32	1	A	-0.146035	29	7-19
20140212@815.asc	NC-6 T7-20	7-20	-0.27	0.3	31.22	0.16	27.87	0.331		2/14/2014	23:05:00	1.246	2.004	1.609	98.4	1465	1822	0.013502	0.0112555	1128.73	2	A	1.83025	29	7-20
20140212@816.asc	UWC-3						9.308	0.38		2014-02-14	23:09:00	1.244	2.037	1.637		-630	60	0.00225455				C
20140212@817.asc	UWC-3						9.204	0.392		2014-02-14	23:12:00	1.247	2.04	1.636		-678	-27	0.00229014				C
20140212@818.asc	UWC-3						9.272	0.319		2014-02-14	23:16:00	1.248	2.041	1.635		-672	-44	0.00234002				C
20140212@819.asc	UWC-3						9.232	0.324		2014-02-14	23:19:00	1.25	2.033	1.627		-654	-73	0.00229465				C
	Bracket						9.199	0.162	0.9967
20140212@820.asc	NC-6 T8-1	8-1	-0.43	0.14	31.05	0.39	27.802	0.404		2/14/2014	23:24:00	1.248	2.011	1.611	98.7	1957	1567	0.0139748	0.0114578	1037.99	2	A	-1.08209	27	8-1
20140212@821.asc	NC-6 T8-2	8-2	-0.45	0.12	31.03	0.39	27.783	0.333		2/14/2014	23:28:00	1.258	2.009	1.597	97.9	1948	1583	0.0140798	0.0115628	1047.61	1	A	0.422319	27	8-2
20140212@822.asc	NC-6 T8-3	8-3	-0.46	0.11	31.02	0.39	27.771	0.339		2/14/2014	23:31:00	1.275	2.057	1.613	98.9	1971	1586	0.0131873	0.0106703	1058.12	1	A	2.00365	27	8-3
20140212@823.asc	NC-6 T8-4	8-4	-0.88	-0.31	30.59	0.39	27.341	0.312		2/14/2014	23:35:00	1.261	2.023	1.605	98.4	1944	1604	0.0142674	0.0117505	1067.44	1	A	-3.70484	28	8-4
20140212@824.asc	NC-6 T8-5	8-5	-0.86	-0.29	30.61	0.39	27.364	0.41		2/14/2014	23:38:00	1.246	2.009	1.612	98.8	1967	1608	0.017486	0.014969	1078.86	3	A	1.02891	28	8-5
20140212@825.asc	NC-6 T8-6	8-6	-1.08	-0.51	30.38	0.39	27.135	0.347		2/14/2014	23:42:00	1.238	2.001	1.616	99	1987	1612	0.0148616	0.0123446	1089.07	1	A	1.47308	28	8-6
20140212@826.asc	NC-6 T8-7	8-7	-1.38	-0.81	30.08	0.39	26.829	0.433		2/14/2014	23:45:00	1.229	2.001	1.628	99.8	1978	1627	0.0152433	0.0127263	1099.89	1	A	-2.15231	29	8-7
20140212@827.asc	NC-6 T8-8	8-8	-0.31	0.26	31.18	0.39	27.932	0.392		2/14/2014	23:49:00	1.214	1.959	1.614	98.9	2007	1632	0.0131198	0.0106029	1112.51	1	A	-1.99551	29	8-8
20140212@828.asc	NC-6 T8-9	8-9	-0.77	-0.2	30.7	0.39	27.455	0.33		2/14/2014	23:53:00	1.182	1.891	1.599	98	2020	1642	0.0141076	0.0115907	1125.13	1	A	1.94466	29	8-9
20140212@829.asc	NC-6 T8-10	8-10	-1.19	-0.62	30.27	0.39	27.022	0.319		2/14/2014	23:56:00	1.158	1.864	1.61	98.7	1971	1665	0.0142034	0.0116864	1132.64	3	A	3.55938	29	8-10
20140212@830.asc	UWC-3						8.914	0.381		2014-02-15	00:01:00	1.139	1.882	1.652		-584	30	0.00240598				C
20140212@831.asc	UWC-3 Cs-135						9.43	0.308		2014-02-15	00:06:00	1.057	1.683	1.592		-578	8	0.00272098				C
20140212@832.asc	UWC-3						9.399	0.416		2014-02-15	00:09:00	1.002	1.624	1.62		-597	-31	0.00275218				C
20140212@833.asc	UWC-3						9.307	0.299		2014-02-15	00:13:00	0.994	1.623	1.633		-525	43	0.00277713				C
20140212@834.asc	UWC-3						9.626	0.43		2014-02-15	00:16:00	0.998	1.651	1.654		-483	52	0.00281716				C
	Bracket						9.299	0.385	0.9968
20140212@835.asc	UWC-3						8.971	0.349		2014-02-15	00:29:00	1.253	2.088	1.666		-450	48	0.00228529				C
20140212@836.asc	UWC-3						8.395	0.34		2014-02-15	00:33:00	1.262	2.114	1.676		-438	27	0.00225446				C
20140212@837.asc	UWC-3						8.544	0.332		2014-02-15	00:36:00	1.283	2.154	1.678		-457	29	0.00226562				C
20140212@838.asc	UWC-3						8.581	0.311		2014-02-15	00:39:00	1.313	2.207	1.681		-439	11	0.00226289				C
20140212@839.asc	NC-6 T8-11	8-11	-0.7	-0.13	30.77	0.39	26.741	0.448		2/15/2014	00:44:00	1.353	2.204	1.629	97.7	2045	1646	0.0141626	0.0118956	1139.25	3	A	1.45336	29	8-11
20140212@840.asc	NC-6 T8-12	8-12	-0.21	0.36	31.29	0.39	27.253	0.411		2/15/2014	00:47:00	1.379	2.27	1.646	98.7	2023	1674	0.0125848	0.0103178	1156.98	1	A	-2.10411	30	8-12
20140212@841.asc	NC-6 T8-13	8-13	-0.2	0.37	31.29	0.39	27.26	0.441		2/15/2014	00:51:00	1.382	2.269	1.642	98.5	2042	1679	0.0117558	0.00948885	1166.29	1	A	4.63649	30	8-13
20140212@842.asc	NC-6 T8-14	8-14	-1.14	-0.57	30.33	0.39	26.296	0.429		2/15/2014	00:55:00	1.395	2.176	1.56	93.6	2005	1696	0.0132773	0.0110103	1172.3	3	A	3.25951	30	8-14
20140212@843.asc	NC-6 T8-15	8-15	-0.08	0.49	31.42	0.39	27.384	0.433		2/15/2014	00:58:00	1.407	2.306	1.639	98.3	2082	1675	0.0132344	0.0109674	1176.21	1	A	2.25867	30	8-15
20140212@844.asc	NC-6 T8-16	8-16	-0.58	-0.01	30.9	0.39	26.873	0.347		2/15/2014	01:02:00	1.416	2.334	1.648	98.9	2083	1692	0.0132729	0.0110059	1190.63	1	A	-3.24701	30	8-16
20140212@845.asc	NC-6 T8-17	8-17	-0.47	0.1	31.01	0.39	26.979	0.351		2/15/2014	01:06:00	1.412	2.329	1.65	99	2063	1708	0.0128657	0.0105987	1199.65	2	A	-0.863366	31	8-17
20140212@846.asc	NC-6 T8-18	8-18	-0.02	0.55	31.48	0.39	27.442	0.434		2/15/2014	01:09:00	1.42	2.367	1.667	100	2076	1721	0.0147331	0.0124661	1214.97	1	A	1.77431	31	8-18
20140212@847.asc	NC-6 T8-19	8-19	0.3	0.87	31.81	0.39	27.772	0.405		2/15/2014	01:13:00	1.433	2.386	1.665	99.9	2092	1727	0.013836	0.011569	1225.79	1	A	-6.12753	32	8-19
20140212@848.asc	NC-6 T8-20	8-20	0.2	0.77	31.7	0.39	27.67	0.374		2/15/2014	01:16:00	1.428	2.349	1.646	98.7	2062	1741	0.0120448	0.00977782	1229.09	2	A	-4.93519	32	8-20
20140212@849.asc	UWC-3						8.322	0.423		2014-02-15	01:21:00	1.421	2.385	1.679		-1002	99	0.00197382				C
20140212@850.asc	UWC-3						8.47	0.4		2014-02-15	01:25:00	1.442	2.394	1.66		-986	80	0.00365086				C
20140212@851.asc	UWC-3						8.502	0.405		2014-02-15	01:28:00	1.383	2.235	1.616		-981	57	0.00174302				C
20140212@852.asc	UWC-3						8.46	0.346		2014-02-15	01:32:00	1.349	2.264	1.678		-991	39	0.00170001				C
	Bracket						8.531	0.391	0.9961
20140212@853.asc	NC-6 T9-1	9-1	-0.26	0.31	31.23	0.12	27.112	0.335		2/15/2014	01:40:00	1.408	2.317	1.646	98.7	2550	1477	0.0131052	0.0111539	1153.97	3	A	-3.08063	30	9-1
20140212@854.asc	NC-6 T9-2	9-2	-0.44	0.13	31.05	0.12	26.93	0.362		2/15/2014	01:44:00	1.407	2.32	1.648	98.8	2523	1485	0.0128507	0.0108994	1153.07	1	A	-3.62865	30	9-2
20140212@855.asc	NC-6 T9-3	9-3	-0.04	0.53	31.45	0.12	27.333	0.423		2/15/2014	01:47:00	1.382	2.268	1.641	98.4	2532	1500	0.0116385	0.00968717	1169.6	2	A	2.88901	30	9-3
20140212@856.asc	NC-6 T9-4	9-4	0.16	0.73	31.67	0.12	27.547	0.357		2/15/2014	01:51:00	1.359	2.224	1.636	98.1	2519	1509	0.0117694	0.00981805	1175.61	1	A	3.03058	30	9-4
20140212@857.asc	NC-6 T9-5	9-5	-0.08	0.49	31.42	0.12	27.297	0.366		2/15/2014	01:55:00	1.345	2.213	1.645	98.6	2553	1502	0.0133807	0.0114293	1179.21	1	A	2.67023	30	9-5
20140212@858.asc	NC-6 T9-6	9-6	-0.36	0.21	31.12	0.12	27.005	0.426		2/15/2014	01:59:00	1.324	2.17	1.639	98.3	2542	1522	0.0128241	0.0108728	1193.64	1	A	-4.05094	31	9-6
20140212@859.asc	NC-6 T9-7	9-7	-0.3	0.27	31.18	0.12	27.066	0.271		2/15/2014	02:02:00	1.336	2.18	1.632	97.8	2560	1522	0.0135293	0.011578	1199.35	1	A	-0.531639	31	9-7
20140212@860.asc	NC-6 T9-8	9-8	-0.48	0.09	31	0.12	26.886	0.394		2/15/2014	02:06:00	1.341	2.216	1.652	99	2554	1540	0.0135321	0.0115808	1214.07	2	A	1.2097	31	9-8
20140212@861.asc	NC-6 T9-9	9-9	0.58	1.15	32.1	0.12	27.978	0.366		2/15/2014	02:09:00	1.352	2.252	1.666	99.9	2547	1557	0.0128498	0.0108985	1226.69	1	A	-6.46109	32	9-9
20140212@862.asc	NC-6 T9-10	9-10	0.87	1.44	32.39	0.12	28.271	0.355		2/15/2014	02:13:00	1.365	2.268	1.661	99.6	2568	1559	0.0122704	0.010319	1235.1	1	A	-1.02118	32	9-10
20140212@863.asc	UWC-3						8.439	0.341		2014-02-15	02:17:00	1.379	2.309	1.675		-1059	102	0.00161224				C
20140212@864.asc	UWC-3						8.503	0.444		2014-02-15	02:21:00	1.377	2.314	1.681		-1050	83	0.00163998				C
20140212@865.asc	UWC-3						8.484	0.305		2014-02-15	02:25:00	1.379	2.319	1.682		-1050	55	0.00162904				C
20140212@866.asc	UWC-3						8.393	0.432		2014-02-15	02:28:00	1.39	2.322	1.671		-1069	70	0.00166179				C
	Bracket						8.447	0.124	0.996
20140212@867.asc	NC-6 T9-11	9-11	0.12	0.69	31.62	0.26	27.456	0.415		2/15/2014	02:32:00	1.369	2.27	1.658	99	2557	1570	0.0140075	0.0123955	1242.01	1	A	2.86793	32	9-11
20140212@868.asc	NC-6 T9-12	9-12	0.08	0.65	31.58	0.26	27.413	0.407		2/15/2014	02:36:00	1.379	2.28	1.654	98.7	2584	1562	0.0121919	0.0105799	1244.72	3	A	3.23732	32	9-12
20140212@869.asc	NC-6 T9-13	9-13	-0.27	0.3	31.22	0.26	27.054	0.366		2/15/2014	02:40:00	1.395	2.31	1.656	98.8	2558	1587	0.0134831	0.011871	1258.24	2	A	-0.0526804	32	9-13
20140212@870.asc	NC-6 T9-14	9-14	-0.67	-0.1	30.81	0.26	26.648	0.355		2/15/2014	02:43:00	1.411	2.336	1.656	98.8	2591	1589	0.0115012	0.0098891	1269.66	1	A	1.23086	32	9-14
20140212@871.asc	NC-6 T9-15	9-15	-0.73	-0.16	30.75	0.26	26.583	0.399		2/15/2014	02:47:00	1.416	2.316	1.636	97.6	2604	1598	0.0123288	0.0107167	1281.97	3	A	0.172028	33	9-15
20140212@872.asc	NC-6 T9-16	9-16	-1.18	-0.61	30.28	0.26	26.122	0.451		2/15/2014	02:50:00	1.415	2.305	1.63	97.3	2577	1611	0.0133987	0.0117867	1285.88	2	A	-0.822704	33	9-16
20140212@873.asc	NC-6 T9-17	9-17	-0.42	0.15	31.07	0.26	26.905	0.383		2/15/2014	02:54:00	1.414	2.31	1.633	97.5	2570	1625	0.0116429	0.0100309	1297.6	3	A	-1.01317	33	9-17
20140212@874.asc	NC-6 T9-18	9-18	-0.82	-0.25	30.65	0.26	26.487	0.379		2/15/2014	02:57:00	1.412	2.344	1.66	99.1	2606	1620	0.0124404	0.0108283	1304.81	1	A	-1.79795	33	9-18
20140212@875.asc	NC-6 T9-19	9-19	-0.67	-0.1	30.81	0.26	26.644	0.428		2/15/2014	03:01:00	1.419	2.341	1.65	98.5	2557	1645	0.0120076	0.0103956	1311.72	1	A	-2.99588	34	9-19
20140212@876.asc	NC-6 T9-20	9-20	-0.45	0.12	31.03	0.26	26.871	0.379		2/15/2014	03:05:00	1.428	2.367	1.658	98.9	2585	1647	0.0150378	0.0134257	1321.34	2	A	1.02064	34	9-20
20140212@877.asc	UWC-3						8.208	0.355		2014-02-15	03:09:00	1.43	2.391	1.672		-972	8	0.00157157				C
20140212@878.asc	UWC-3						8.205	0.378		2014-02-15	03:13:00	1.424	2.385	1.674		-983	-12	0.00159743				C
20140212@879.asc	UWC-3						8.553	0.316		2014-02-15	03:16:00	1.417	2.369	1.672		-1004	-4	0.00160088				C
20140212@880.asc	UWC-3						8.426	0.327		2014-02-15	03:19:00	1.423	2.386	1.676		-1023	-33	0.00158352				C
	Bracket						8.401	0.26	0.996
20140212@881.asc	NC-6 T10-1	10-1	0.39	0.96	31.9	0.31	27.713	0.332		2/15/2014	03:24:00	1.434	2.361	1.646	98.7	2914	1417	0.0132157	0.0115939	1234.2	1	A	-1.45917	32	10-1
20140212@882.asc	NC-6 T10-2	10-2	0.42	0.99	31.93	0.31	27.735	0.369		2/15/2014	03:27:00	1.432	2.368	1.653	99.1	2904	1429	0.0130656	0.0114437	1241.11	1	A	3.50411	32	10-2
20140212@883.asc	NC-6 T10-3	10-3	0.2	0.77	31.7	0.31	27.512	0.42		2/15/2014	03:31:00	1.419	2.348	1.655	99.2	2924	1429	0.012963	0.0113412	1247.42	2	A	2.00554	32	10-3
20140212@884.asc	NC-6 T10-4	10-4	-0.26	0.31	31.23	0.31	27.045	0.409		2/15/2014	03:34:00	1.41	2.299	1.63	97.8	2921	1444	0.0170157	0.0153938	1261.24	3	A	0.00506907	32	10-4
20140212@885.asc	NC-6 T10-5	10-5	-0.55	0.02	30.93	0.31	26.744	0.306		2/15/2014	03:38:00	1.409	2.311	1.64	98.3	2948	1441	0.0131324	0.0115106	1268.15	1	A	1.6141	32	10-5
20140212@886.asc	NC-6 T10-6	10-6	-0.67	-0.1	30.8	0.31	26.617	0.429		2/15/2014	03:42:00	1.405	2.304	1.64	98.4	2942	1461	0.01535	0.0137281	1282.27	1	A	-0.18677	33	10-6
20140212@887.asc	NC-6 T10-7	10-7	-0.35	0.22	31.14	0.31	26.95	0.346		2/15/2014	03:46:00	1.404	2.295	1.635	98	2960	1460	0.012864	0.0112421	1287.98	1	A	-0.0431628	33	10-7
20140212@888.asc	NC-6 T10-8	10-8	-0.69	-0.12	30.78	0.31	26.595	0.378		2/15/2014	03:50:00	1.416	2.336	1.65	98.9	2978	1470	0.0124278	0.0108059	1302.11	3	A	1.32549	33	10-8
20140212@889.asc	NC-6 T10-9	10-9	0.02	0.59	31.52	0.31	27.33	0.367		2/15/2014	03:53:00	1.421	2.322	1.634	98	2952	1487	0.0116337	0.0100119	1309.92	1	A	-1.42813	34	10-9
20140212@890.asc	NC-6 T10-10	10-10	-0.33	0.24	31.15	0.31	26.967	0.347		2/15/2014	03:57:00	1.408	2.295	1.629	97.7	2939	1502	0.0130066	0.0113847	1320.13	3	A	1.12095	34	10-10
20140212@891.asc	UWC-3						8.637	0.408		2014-02-15	04:02:00	1.381	2.289	1.657		-1140	2	0.0016282				C
20140212@892.asc	UWC-3						8.329	0.325		2014-02-15	04:05:00	1.38	2.289	1.658		-1136	-25	0.00166636				C
20140212@893.asc	UWC-3						8.367	0.404		2014-02-15	04:09:00	1.401	2.341	1.671		-1154	-25	0.00165091				C
20140212@894.asc	UWC-3						8.299	0.403		2014-02-15	04:12:00	1.419	2.359	1.662		-1146	-50	0.0016759				C
	Bracket						8.378	0.309	0.9959
20140212@895.asc	NC-6 T10-11	10-11	0.37	0.94	31.88	0.26	27.663	0.447		2/15/2014	04:16:00	1.435	2.36	1.644	98.7	2956	1509	0.0135496	0.0119014	1331.55	2	A	-0.847516	34	10-11
20140212@896.asc	NC-6 T10-12	10-12	0.06	0.63	31.56	0.26	27.342	0.43		2/15/2014	04:20:00	1.457	2.393	1.642	98.5	2935	1521	0.0127149	0.0110668	1337.26	2	A	0.317811	34	10-12
20140212@897.asc	NC-6 T10-13	10-13	-0.1	0.47	31.39	0.26	27.174	0.416		2/15/2014	04:23:00	1.468	2.416	1.645	98.7	2950	1524	0.0130484	0.0114002	1342.67	1	A	3.25208	35	10-13
20140212@898.asc	NC-6 T10-14	10-14	-0.59	-0.02	30.89	0.26	26.677	0.308		2/15/2014	04:27:00	1.475	2.437	1.652	99.1	2937	1540	0.0151997	0.0135515	1352.89	2	A	-3.02482	35	10-14
20140212@899.asc	NC-6 T10-15	10-15	0.1	0.67	31.61	0.26	27.387	0.346		2/15/2014	04:30:00	1.475	2.417	1.639	98.3	2948	1549	0.0120717	0.0104235	1365.2	2	A	1.25834	35	10-15
20140212@900.asc	NC-6 T10-16	10-16	0.28	0.85	31.79	0.26	27.566	0.319		2/15/2014	04:34:00	1.477	2.415	1.635	98.1	2932	1556	0.0124904	0.0108422	1365.51	3	A	1.35054	35	10-16
20140212@901.asc	NC-6 T10-17	10-17	0.4	0.97	31.92	0.26	27.695	0.382		2/15/2014	04:38:00	1.474	2.418	1.641	98.5	2925	1570	0.0139099	0.0122617	1376.32	1	A	1.45003	35	10-17
20140212@902.asc	NC-6 T10-18	10-18	-0.24	0.33	31.25	0.26	27.037	0.298		2/15/2014	04:42:00	1.474	2.423	1.644	98.6	2941	1571	0.0124533	0.0108051	1382.03	1	A	1.26902	35	10-18
20140212@903.asc	NC-6 T10-19	10-19	-0.08	0.49	31.42	0.26	27.201	0.328		2/15/2014	04:45:00	1.473	2.428	1.648	98.9	2925	1583	0.0123029	0.0106547	1388.34	1	A	-5.04358	36	10-19
20140212@904.asc	NC-6 T10-20	10-20	0.09	0.66	31.59	0.26	27.375	0.368		2/15/2014	04:49:00	1.473	2.407	1.635	98.1	2950	1583	0.0126691	0.0110209	1397.96	2	A	-2.01982	36	10-20
20140212@905.asc	UWC-3						8.224	0.333		2014-02-15	04:54:00	1.474	2.465	1.673		-1087	-21	0.0016196				C
20140212@906.asc	UWC-3						8.276	0.368		2014-02-15	04:57:00	1.475	2.464	1.671		-1050	-33	0.00163031				C
20140212@907.asc	UWC-3						8.259	0.338		2014-02-15	05:01:00	1.477	2.464	1.668		-1122	-72	0.0016424				C
20140212@908.asc	UWC-3						8.404	0.335		2014-02-15	05:04:00	1.476	2.464	1.669		-1165	-49	0.0016719				C
	Bracket						8.349	0.26	0.9959
20140212@909.asc	NC-6 T10-21	10-21	0.27	0.84	31.77	0.41	27.609	0.38		2/15/2014	05:08:00	1.467	2.438	1.662	99.3	2910	1597	0.0115778	0.00985158	1396.9	1	A	-2.09518	36	10-21
20140212@910.asc	NC-6 T10-22	10-22	0.03	0.6	31.53	0.41	27.369	0.387		2/15/2014	05:12:00	1.466	2.42	1.651	98.6	2973	1589	0.0121024	0.0103762	1411.48	2	A	3.04426	36	10-22
20140212@911.asc	NC-6 T10-23	10-23	-0.74	-0.17	30.73	0.41	26.575	0.382		2/15/2014	05:15:00	1.469	2.444	1.664	99.4	2972	1606	0.0134025	0.0116763	1425.9	4	A	-0.172196	36	10-23
20140212@912.asc	NC-6 T10-24	10-24	-0.39	0.18	31.09	0.41	26.933	0.31		2/15/2014	05:19:00	1.472	2.475	1.682	100.4	2992	1605	0.0129316	0.0112054	1430.11	1	A	1.68874	36	10-24
20140212@913.asc	NC-6 T11-1	11-1	0.21	0.78	31.71	0.41	27.548	0.386		2/15/2014	05:25:00	1.472	2.419	1.643	98.1	3588	1317	0.0117755	0.0100493	1381.13	1	A	2.02669	35	11-1
20140212@914.asc	NC-6 T11-2	11-2	-0.14	0.43	31.36	0.41	27.196	0.396		2/15/2014	05:28:00	1.472	2.435	1.654	98.8	3574	1330	0.0131453	0.011419	1384.13	2	A	-0.302155	36	11-2
20140212@915.asc	NC-6 T11-3	11-3	-0.26	0.31	31.23	0.41	27.066	0.411		2/15/2014	05:32:00	1.469	2.42	1.647	98.4	3610	1333	0.0143348	0.0126086	1399.76	1	A	-0.0777562	36	11-3
20140212@916.asc	NC-6 T11-4	11-4	0.33	0.9	31.84	0.41	27.679	0.368		2/15/2014	05:36:00	1.455	2.386	1.64	97.9	3601	1352	0.0131098	0.0113836	1413.28	1	A	2.65742	36	11-4
20140212@917.asc	NC-6 T11-5	11-5	-0.94	-0.37	30.53	0.41	26.369	0.431		2/15/2014	05:40:00	1.452	2.372	1.634	97.6	3617	1353	0.0170138	0.0152876	1418.69	5	A	-0.481896	36	11-5
20140212@918.asc	NC-6 T11-6	11-6	0.26	0.83	31.77	0.41	27.606	0.316		2/15/2014	05:44:00	1.456	2.39	1.641	98	3576	1370	0.0128716	0.0111453	1421.69	1	A	-1.08748	36	11-6
20140212@919.asc	UWC-3						8.676	0.396		2014-02-15	05:49:00	1.45	2.421	1.67		-1111	78	0.00170049				C
20140212@920.asc	UWC-3						8.19	0.44		2014-02-15	05:52:00	1.448	2.429	1.678		-1110	47	0.00174482				C
20140212@921.asc	UWC-3						8.544	0.334		2014-02-15	05:55:00	1.441	2.397	1.663		-1154	-69	0.00182433				C
20140212@922.asc	UWC-3						8.335	0.443		2014-02-15	05:59:00	1.44	2.413	1.675		-1170	-81	0.00176603				C
20140212@923.asc	UWC-3						8.742	0.413		2014-02-15	06:03:00	1.453	2.474	1.703		-1261	-15	0.00193622				C
	Bracket						8.406	0.405	0.996
20140212@924.asc	NC-6 T11-7	11-7	-1.02	-0.45	30.44	0.34	26.385	0.375		2/15/2014	06:08:00	1.467	2.448	1.669	99.3	3583	1387	0.0152102	0.0134466	1438.82	2	A	-1.56824	36	11-7
20140212@925.asc	NC-6 T11-8	11-8	0.15	0.72	31.65	0.34	27.59	0.36		2/15/2014	06:11:00	1.471	2.452	1.667	99.2	3610	1382	0.014519	0.0127554	1444.53	1	A	-4.31003	37	11-8
20140212@926.asc	NC-6 T11-9	11-9	0.49	1.06	32	0.34	27.937	0.41		2/15/2014	06:15:00	1.47	2.438	1.658	98.7	3588	1403	0.0119182	0.0101546	1455.95	2	A	3.3132	37	11-9
20140212@927.asc	NC-6 T11-10	11-10	0.63	1.2	32.14	0.34	28.079	0.233		2/15/2014	06:19:00	1.469	2.436	1.658	98.6	3613	1395	0.0116548	0.00989119	1458.35	2	A	3.18772	37	11-10
20140212@928.asc	NC-6 T11-11	11-11	0.24	0.81	31.74	0.34	27.681	0.384		2/15/2014	06:22:00	1.48	2.442	1.65	98.2	3603	1410	0.0152283	0.0134648	1465.86	3	A	0.254584	37	11-11
20140212@929.asc	NC-6 T11-12	11-12	-0.71	-0.14	30.76	0.34	26.705	0.387		2/15/2014	06:26:00	1.478	2.431	1.644	97.8	3622	1410	0.0139951	0.0122315	1473.98	3	A	-4.1089	38	11-12
20140212@930.asc	NC-6 T11-13	11-13	-0.53	0.04	30.95	0.34	26.895	0.416		2/15/2014	06:30:00	1.472	2.456	1.669	99.3	3611	1423	0.0130499	0.0112864	1481.49	2	A	-0.409643	38	11-13
20140212@931.asc	NC-6 T11-14	11-14	-0.01	0.56	31.49	0.34	27.428	0.474		2/15/2014	06:35:00	1.464	2.431	1.66	98.8	3610	1441	0.0145148	0.0127512	1497.11	1	A	1.41166	38	11-14
20140212@932.asc	NC-6 T11-15	11-15	0.19	0.76	31.69	0.34	27.632	0.349		2/15/2014	06:38:00	1.467	2.42	1.65	98.2	3633	1440	0.0132569	0.0114933	1504.02	2	A	1.12645	38	11-15
20140212@933.asc	NC-6 T11-16	11-16	-0.23	0.34	31.26	0.34	27.2	0.387		2/15/2014	06:42:00	1.468	2.437	1.66	98.8	3597	1454	0.0136928	0.0119292	1506.73	2	A	1.23322	38	11-16
20140212@934.asc	UWC-3						8.534	0.353		2014-02-15	06:46:00	1.464	2.481	1.695		-737	128	0.00169524				C
20140212@935.asc	UWC-3						8.59	0.327		2014-02-15	06:50:00	1.461	2.466	1.688		-761	122	0.0017125				C
20140212@936.asc	UWC-3						8.591	0.348		2014-02-15	06:53:00	1.451	2.435	1.678		-750	76	0.0017344				C
20140212@937.asc	UWC-3						8.321	0.366		2014-02-15	06:57:00	1.433	2.401	1.676		-770	58	0.00176435				C
20140212@938.asc	UWC-3						8.51	0.332		2014-02-15	07:01:00	1.419	2.392	1.686		-778	150	0.00175749				C
	Bracket						8.503	0.343	0.9961
20140212@939.asc	NC-6 T11-17	11-17	-0.24	0.33	31.25	0.26	27.174	0.309		2/15/2014	07:04:00	1.422	2.366	1.664	98.8	3620	1457	0.0136515	0.0118848	1516.64	3	A	0.124066	39	11-17
20140212@940.asc	NC-6 T11-18	11-18	-0.33	0.24	31.16	0.26	27.084	0.384		2/15/2014	07:08:00	1.435	2.385	1.662	98.7	3602	1471	0.0123084	0.0105417	1523.25	2	A	0.773296	39	11-18
20140212@941.asc	NC-6 T11-19	11-19	-1.34	-0.77	30.11	0.26	26.044	0.291		2/15/2014	07:12:00	1.433	2.421	1.689	100.3	3619	1479	0.0139843	0.0122176	1535.27	5	A	-0.611759	40	11-19
20140212@942.asc	NC-6 T12-1	12-1	0.54	1.11	32.05	0.26	27.976	0.332		2/15/2014	07:16:00	1.421	2.344	1.65	98	3874	1228	0.0134174	0.0116507	1383.98	1	A	-0.188875	36	12-1
20140212@943.asc	NC-6 T12-2	12-2	0.01	0.58	31.51	0.26	27.431	0.392		2/15/2014	07:20:00	1.43	2.363	1.652	98.1	3886	1242	0.0136793	0.0119126	1398.56	1	A	-1.42408	36	12-2
20140212@944.asc	NC-6 T12-3	12-3	0.46	1.03	31.97	0.26	27.899	0.404		2/15/2014	07:24:00	1.447	2.384	1.647	97.9	3901	1249	0.0122346	0.0104679	1409.52	1	A	3.24101	36	12-3
20140212@945.asc	NC-6 T12-4	12-4	0.3	0.87	31.81	0.26	27.734	0.355		2/15/2014	07:27:00	1.438	2.367	1.646	97.8	3875	1276	0.0125817	0.010815	1426.95	1	A	0.644219	36	12-4
20140212@946.asc	NC-6 T12-5	12-5	0.35	0.92	31.86	0.26	27.781	0.364		2/15/2014	07:31:00	1.407	2.309	1.642	97.5	3869	1288	0.0136754	0.0119087	1437.92	1	A	-1.21701	36	12-5
20140212@947.asc	NC-6 T12-6	12-6	0.66	1.23	32.18	0.26	28.101	0.37		2/15/2014	07:35:00	1.394	2.296	1.648	97.9	3897	1295	0.012842	0.0110753	1450.84	1	A	-0.770672	37	12-6
20140212@948.asc	NC-6 T12-7	12-7	-0.28	0.29	31.21	0.26	27.135	0.427		2/15/2014	07:39:00	1.395	2.289	1.641	97.5	3883	1330	0.0135306	0.0117639	1480.74	1	A	-0.73042	38	12-7
20140212@949.asc	NC-6 T12-8	12-8	-0.43	0.14	31.06	0.26	26.983	0.423		2/15/2014	07:43:00	1.399	2.318	1.657	98.4	3871	1337	0.0135545	0.0117878	1482.09	1	A	-0.239122	38	12-8
20140212@950.asc	UWC-3						8.583	0.344		2014-02-15	07:48:00	1.407	2.354	1.673		-1250	118	0.00179468				C
20140212@951.asc	UWC-3						8.313	0.348		2014-02-15	07:51:00	1.425	2.398	1.683		-1204	146	0.00175071				C
20140212@952.asc	UWC-3						8.344	0.279		2014-02-15	07:55:00	1.436	2.42	1.685		-1264	87	0.00186588				C
20140212@953.asc	UWC-3						8.633	0.462		2014-02-15	07:58:00	1.457	2.46	1.688		-1294	90	0.00182513				C
	Bracket						8.491	0.258	0.9961
20110628@194.asc	UWC-3						7.002	0.442		2011-06-28	20:57:00	1.35592	3.16124	2.33143		-1487	131					C
20110628@195.asc	UWC-3						7.047	0.434		2011-06-28	21:01:00	1.35784	3.13893	2.31171		-1464	89					C
20110628@196.asc	UWC-3						6.842	0.498		2011-06-28	21:04:00	1.36148	3.17026	2.32854		-1496	-8					C
20110628@197.asc	UWC-3						6.987	0.442		2011-06-28	21:08:00	1.35858	3.15016	2.31871		-1522	18					C
							6.9695	0.177482	0.994548
20110628@198.asc	6-NC	1-1	-0.814406	0.03	30.94	0.19	25.276	0.538		6/28/2011	21:20:00	1.34	2.983	2.226	95.359	-4517	1583	NA	NA	38	1	A	3.10954	1	1-1
20110628@199.asc	6-NC	1-2	-1.26441	-0.42	30.48	0.19	24.822	0.501		6/28/2011	21:24:00	1.338	2.975	2.225	95.314	-4501	1589	NA	NA	43.829	2	A	3.40787	1	1-2
20110628@200.asc	6-NC	1-3	0.365594	1.21	32.16	0.19	26.49	0.363		6/28/2011	21:30:00	1.332	2.937	2.206	94.503	-4513	1593	NA	NA	48.762	1	A	2.47483	1	1-3
20110628@201.asc	6-NC	1-4	-0.434406	0.41	31.34	0.19	25.673	0.531		6/28/2011	21:33:00	1.332	2.987	2.243	96.088	-4509	1607	NA	NA	61.318	3	A	-5.31013	1	1-4
20110628@202.asc	6-NC	1-6	-0.814406	0.03	30.94	0.19	25.279	0.441		6/28/2011	21:37:00	1.331	2.964	2.227	95.429	-4505	1621	NA	NA	75.219	3	A	4.11545	2	1-6
20110628@203.asc	6-NC	1-5	-2.48441	-1.64	29.22	0.19	23.57	0.734		6/28/2011	21:41:00	1.334	2.9	2.174	93.158	-4519	1617	NA	NA	69.838	2	A	1.17407	2	1-5
20110628@204.asc	6-NC	1-7	-0.974406	-0.13	30.78	0.19	25.116	0.505		6/28/2011	21:45:00	1.328	2.953	2.224	95.293	-4505	1633	NA	NA	87.775	1	A	-3.15062	3	1-7
20110628@205.asc	6-NC	1-8	-1.13441	-0.29	30.61	0.19	24.949	0.499		6/28/2011	21:49:00	1.325	2.998	2.262	96.918	-4500	1650	NA	NA	103.919	3	A	3.71892	3	1-8
20110628@206.asc	6-NC	1-9	-1.23441	-0.39	30.51	0.19	24.85	0.513		6/28/2011	21:52:00	1.322	2.923	2.211	94.743	-4513	1660	NA	NA	111.094	4	A	3.17015	3	1-9
20110628@207.asc	6-NC	1-10	-0.794406	0.05	30.96	0.19	25.295	0.438		6/28/2011	21:56:00	1.322	2.967	2.244	96.151	-4490	1667	NA	NA	119.614	5	A	-4.50998	3	1-10
20110628@208.asc	UWC-3						6.968	0.469		2011-06-28	22:00:00	1.31896	3.10898	2.35714		-1606	81					C
20110628@209.asc	UWC-3 Cs = 198						6.944	0.459		2011-06-28	22:05:00	1.35444	3.18591	2.3522		-1598	68					C
20110628@210.asc	UWC-3						6.76	0.533		2011-06-28	22:08:00	1.37529	3.22582	2.34557		-1590	56					C
20110628@211.asc	UWC-3						6.884	0.389		2011-06-28	22:11:00	1.3878	3.22786	2.32588		-1588	48					C
							6.92925	0.189009	0.994508
20110628@212.asc	6-NC	1-11	-1.28441	-0.44	30.46	0.19	24.745	0.67		6/28/2011	22:16:00	1.393	3.107	2.23	95.52	-4499	1673	NA	NA	126.789	2	A	-1.95476	4	1-11
20110628@213.asc	6-NC	1-12	-0.974406	-0.13	30.77	0.19	25.062	0.556		6/28/2011	22:20:00	1.393	3.104	2.227	95.411	-4481	1687	NA	NA	139.793	3	A	3.92364	4	1-12
20110628@214.asc	6-NC	1-13	-0.794406	0.05	30.96	0.19	25.252	0.499		6/28/2011	22:24:00	1.392	3.071	2.206	94.506	-4497	1692	NA	NA	144.278	3	A	2.32484	4	1-13
20110628@215.asc	6-NC	1-14	-0.884406	-0.04	30.87	0.19	25.158	0.449		6/28/2011	22:27:00	1.392	3.103	2.23	95.504	-4481	1706	NA	NA	159.524	4	A	0.240332	5	1-14
20110628@216.asc	6-NC	1-15	-1.43441	-0.59	30.3	0.19	24.592	0.444		6/28/2011	22:31:00	1.395	3.109	2.229	95.463	-4486	1718	NA	NA	171.183	2	A	0.643651	5	1-15
20110628@217.asc	6-NC	1-16	-0.354406	0.49	31.41	0.19	25.699	0.415		6/28/2011	22:34:00	1.392	3.103	2.229	95.468	-4453	1725	NA	NA	179.704	2	A	0.236014	5	1-16
20110628@218.asc	6-NC Transect 2	2-1	-8.37441	-7.53	23.14	0.19	17.473	1.366		6/28/2011	22:41:00	1.396	2.866	2.053	87.94	-4044	1678	NA	NA	159.973	5	A	0.223798	5	2-1
20110628@219.asc	6-NC Transect 2	2-2	-0.644406	0.2	31.12	0.19	25.402	0.492		6/28/2011	22:44:00	1.396	3.134	2.244	96.139	-4031	1694	NA	NA	179.255	2	A	0.28085	5	2-2
20110628@220.asc	6-NC	2-3	-0.704406	0.14	31.06	0.19	25.345	0.439		6/28/2011	22:48:00	1.393	3.102	2.226	95.362	-4015	1691	NA	NA	177.461	2	A	0.197206	5	2-3
20110628@221.asc	6-NC	2-4	-1.05441	-0.21	30.7	0.19	24.986	0.542		6/28/2011	22:52:00	1.389	3.097	2.229	95.47	-4016	1709	NA	NA	193.157	2	A	2.13416	5	2-4
20110628@222.asc	UWC-3						6.94	0.483		2011-06-28	22:55:00	1.39023	3.2262	2.32063		-1582	26					C
20110628@223.asc	UWC-3						6.88	0.45		2011-06-28	22:59:00	1.38561	3.21826	2.32262		-1576	14					C
20110628@224.asc	UWC-3						6.714	0.411		2011-06-28	23:02:00	1.38561	3.22133	2.32484		-1572	3					C
20110628@225.asc	UWC-3						6.984	0.461		2011-06-28	23:05:00	1.39164	3.23948	2.32782		-1568	-4					C
							6.87941	0.189596	0.994459
20110628@226.asc	6-NC	2-5	-1.39441	-0.55	30.35	0.3	24.548	0.56		6/28/2011	23:10:00	1.39	3.048	2.194	94.349	-4024	1725	NA	NA	207.955	3	A	2.35236	5	2-5
20110628@227.asc	6-NC	2-6	-0.174406	0.67	31.6	0.3	25.789	0.459		6/28/2011	23:13:00	1.389	3.119	2.245	96.567	-4016	1737	NA	NA	220.511	1	A	-3.48179	5	2-6
20110628@228.asc	6-NC	2-7	-0.754406	0.09	31	0.3	25.199	0.469		6/28/2011	23:17:00	1.378	3.07	2.228	95.827	-4003	1752	NA	NA	235.757	3	A	-0.924522	6	2-7
20110628@229.asc	6-NC	2-8	-0.394406	0.45	31.37	0.3	25.568	0.438		6/28/2011	23:20:00	1.372	3.084	2.248	96.692	-4008	1760	NA	NA	245.175	1	A	1.92245	6	2-8
20110628@230.asc	6-NC	2-9	-1.13441	-0.29	30.61	0.3	24.81	0.654		6/28/2011	23:24:00	1.373	3.057	2.226	95.726	-3993	1772	NA	NA	257.282	1	A	0.0543996	6	2-9
20110628@231.asc	6-NC	2-10	-1.39441	-0.55	30.35	0.3	24.547	0.56		6/28/2011	23:28:00	1.372	3.022	2.203	94.737	-4004	1781	NA	NA	264.009	1	A	1.03382	6	2-10
20110628@232.asc	6-NC	2-11	-1.48441	-0.64	30.25	0.3	24.453	0.426		6/28/2011	23:31:00	1.369	3.071	2.243	96.477	-3999	1791	NA	NA	274.322	4	A	-0.558411	6	2-11
20110628@233.asc	6-NC	2-13	-0.804406	0.04	30.95	0.3	25.144	0.49		6/28/2011	23:35:00	1.37	3.057	2.232	95.989	-3994	1801	NA	NA	285.085	1	A	-0.929336	7	2-13
20110628@234.asc	6-NC	2-12	-3.27441	-2.43	28.41	0.3	22.617	0.606		6/28/2011	23:38:00	1.372	1.799	1.311	56.405	-4009	1796	NA	NA	268.044	2	A	1.16545	6	2-12
20110628@235.asc	6-NC	2-14	-1.55441	-0.71	30.18	0.3	24.382	0.625		6/28/2011	23:41:00	1.366	3.046	2.23	95.9	-4005	1815	NA	NA	298.089	4	A	-0.846578	7	2-14
20110628@236.asc	UWC-3						6.885	0.426		2011-06-28	23:45:00	1.36954	3.18145	2.32301		-1641	11					C
20110628@237.asc	UWC-3						6.611	0.457		2011-06-28	23:48:00	1.37306	3.19447	2.32654		-1641	-4					C
20110628@238.asc	UWC-3						6.611	0.503		2011-06-28	23:51:00	1.37685	3.20778	2.3298		-1641	-19					C
20110628@239.asc	UWC-3						6.699	0.461		2011-06-28	23:55:00	1.37994	3.20811	2.32482		-1641	-34					C
							6.7905	0.297991	0.994371
20110628@240.asc	6-NC Transect 3	3-1	-1.03441	-0.19	30.71	0.24	24.867	0.507		6/29/2011	00:02:00	1.366	3.027	2.216	95.062	-3276	1741	NA	NA	309.748	3	A	3.61164	6	3-1
20110628@241.asc	6-NC	3-2	-0.304406	0.54	31.46	0.24	25.612	0.481		6/29/2011	00:05:00	1.366	3.044	2.228	95.602	-3261	1753	NA	NA	320.511	1	A	-1.90714	6	3-2
20110628@242.asc	6-NC	3-3	-1.36441	-0.52	30.37	0.24	24.524	0.69		6/29/2011	00:09:00	1.359	2.995	2.204	94.545	-3253	1765	NA	NA	333.067	2	A	-2.01592	7	3-3
20110628@243.asc	6-NC	3-4	-0.444406	0.4	31.32	0.24	25.471	0.431		6/29/2011	00:13:00	1.36	3.048	2.241	96.168	-3247	1777	NA	NA	344.726	1	A	5.99023	7	3-4
20110628@244.asc	6-NC	3-5	-1.29441	-0.45	30.44	0.24	24.599	0.489		6/29/2011	00:17:00	1.356	2.997	2.211	94.862	-3241	1787	NA	NA	354.592	2	A	0.863657	7	3-5
20110628@245.asc	6-NC	3-6	-1.02441	-0.18	30.72	0.24	24.875	0.492		6/29/2011	00:21:00	1.35	3.046	2.257	96.829	-3237	1798	NA	NA	366.251	1	A	-2.52764	8	3-6
20110628@246.asc	6-NC	3-7	-0.234406	0.61	31.54	0.24	25.69	0.538		6/29/2011	00:24:00	1.346	3.024	2.246	96.367	-3235	1810	NA	NA	377.91	1	A	2.72354	8	3-7
20110628@247.asc	6-NC	3-8	-0.0444056	0.8	31.74	0.24	25.884	0.478		6/29/2011	00:28:00	1.347	3.032	2.251	96.583	-3253	1816	NA	NA	382.394	2	A	0.0785359	9	3-8
20110628@248.asc	6-NC	3-9	-0.194406	0.65	31.58	0.24	25.726	0.447		6/29/2011	00:32:00	1.356	3.025	2.231	95.739	-3235	1838	NA	NA	404.816	1	A	2.47795	9	3-9
20110628@249.asc	6-NC	3-10	-2.42441	-1.58	29.29	0.24	23.447	0.339		6/29/2011	00:36:00	1.357	3.043	2.242	96.195	-3224	1860	NA	NA	425.892	5	A	-2.65841	10	3-10
20110628@250.asc	6-NC	3-11	-0.604406	0.24	31.15	0.24	25.304	0.527		6/29/2011	00:40:00	1.356	3.051	2.249	96.487	-3216	1869	NA	NA	438	4	A	2.76189	10	3-11
20110628@251.asc	6-NC	3-12	-0.544406	0.3	31.22	0.24	25.37	0.429		6/29/2011	00:44:00	1.351	3.078	2.278	97.748	-3222	1879	NA	NA	443.829	2	A	0.148534	10	3-12
20110628@252.asc	UWC-3						6.82	0.542		2011-06-29	00:48:00	1.35201	3.1449	2.32609		-1712	-31					C
20110628@253.asc	UWC-3						6.901	0.436		2011-06-29	00:51:00	1.34364	3.14382	2.33978		-1712	-42					C
20110628@254.asc	UWC-3						6.788	0.414		2011-06-29	00:55:00	1.33883	3.12165	2.33162		-1712	-54					C
20110628@255.asc	UWC-3						6.655	0.493		2011-06-29	00:58:00	1.33249	3.12405	2.34451		-1712	-66					C
							6.74625	0.23607	0.994327
20110628@256.asc	6-NC	3-13	-0.154406	0.69	31.62	0.24	25.884	0.439		6/29/2011	01:02:00	1.318	2.957	2.243	96.087	-3220	1764	NA	NA	335.757	1	A	2.9096	7	3-13
20110628@257.asc	6-NC	3-14	-0.254406	0.59	31.52	0.24	25.783	0.547		6/29/2011	01:06:00	1.318	2.973	2.255	96.602	-3189	1774	NA	NA	346.52	2	A	4.44867	7	3-14
20110628@258.asc	6-NC	3-15	-0.594406	0.25	31.17	0.24	25.436	0.483		6/29/2011	01:10:00	1.317	2.959	2.247	96.251	-3202	1789	NA	NA	359.973	3	A	-2.51968	8	3-15
20110628@259.asc	6-NC	3-16	-0.814406	0.03	30.94	0.24	25.207	0.439		6/29/2011	01:13:00	1.318	2.984	2.264	96.99	-3212	1799	NA	NA	368.044	2	A	-0.300001	8	3-16
20110628@260.asc	6-NC	3-17	-0.424406	0.42	31.34	0.24	25.601	0.473		6/29/2011	01:17:00	1.315	2.974	2.262	96.912	-3214	1811	NA	NA	382.394	2	A	0.0785359	9	3-17
20110628@261.asc	6-NC	3-18	-0.614406	0.23	31.15	0.24	25.413	0.539		6/29/2011	01:21:00	1.31	2.989	2.282	97.746	-3184	1821	NA	NA	392.708	1	A	-2.85863	9	3-18
20110628@262.asc	6-NC	3-19	-0.164406	0.68	31.61	0.24	25.872	0.456		6/29/2011	01:25:00	1.309	2.969	2.268	97.163	-3199	1831	NA	NA	400.331	1	A	1.16204	9	3-19
20110628@263.asc	6-NC	3-20	-0.764406	0.08	31	0.24	25.26	0.466		6/29/2011	01:28:00	1.31	2.953	2.254	96.57	-3207	1851	NA	NA	419.166	1	A	-0.12483	9	3-20
20110628@264.asc	6-NC	3-21	-0.864406	-0.02	30.89	0.24	25.159	0.55		6/29/2011	01:32:00	1.311	2.972	2.267	97.093	-3191	1862	NA	NA	431.273	1	A	0.238546	10	3-21
20110628@265.asc	6-NC	3-22	-0.494406	0.35	31.27	0.24	25.53	0.465		6/29/2011	01:35:00	1.315	2.977	2.264	97.001	-3174	1869	NA	NA	440.242	1	A	1.36611	10	3-22
20110628@266.asc	6-NC	3-23	-1.57441	-0.73	30.16	0.24	24.429	0.394		6/29/2011	01:39:00	1.32	2.935	2.223	95.225	-3198	1882	NA	NA	449.21	2	A	-0.621544	10	3-23
20110628@267.asc	6-NC	3-25	-1.09441	-0.25	30.65	0.24	24.92	0.595		6/29/2011	01:43:00	1.322	2.989	2.261	96.832	-3180	1894	NA	NA	463.112	4	A	-2.82844	11	3-25
20110628@268.asc	6-NC	3-24	-0.544406	0.3	31.22	0.24	25.482	0.515		6/29/2011	01:46:00	1.323	3.028	2.288	98.014	-3195	1896	NA	NA	465.354	1	A	-2.70813	11	3-24
20110628@269.asc	UWC-3						7.046	0.47		2011-06-29	01:49:00	1.33069	3.10666	2.33462		-1657	-60					C
20110628@270.asc	UWC-3						6.891	0.435		2011-06-29	01:53:00	1.33594	3.12171	2.33672		-1645	-72					C
20110628@271.asc	UWC-3						6.81	0.488		2011-06-29	01:56:00	1.33746	3.12243	2.33459		-1645	-84					C
20110628@272.asc	UWC-3						6.952	0.454		2011-06-29	02:00:00	1.33621	3.11039	2.32777		-1633	-96					C
							6.85787	0.235402	0.994437
20110628@273.asc	6-NC Transect 4	4-1	-1.02441	-0.18	30.73	0.18	25.085	0.545		6/29/2011	02:09:00	1.32	2.957	2.239	96.352	-2583	1812	NA	NA	430.376	3	A	-0.227856	10	4-1
20110628@274.asc	6-NC Transect 4	4-2	-0.914406	-0.07	30.84	0.18	25.192	0.469		6/29/2011	02:14:00	1.324	2.974	2.246	96.614	-2568	1824	NA	NA	442.035	3	A	0.557499	10	4-2
20110628@275.asc	6-NC	4-3	-0.524406	0.32	31.24	0.18	25.598	0.45		6/29/2011	02:17:00	1.327	2.937	2.214	95.244	-2578	1829	NA	NA	446.52	1	A	-0.897169	10	4-3
20110628@276.asc	6-NC	4-4	-1.17441	-0.33	30.57	0.18	24.927	0.477		6/29/2011	02:21:00	1.327	2.997	2.258	97.154	-2576	1841	NA	NA	458.179	1	A	-3.70961	11	4-4
20110628@277.asc	6-NC	4-5	-0.564406	0.28	31.2	0.18	25.552	0.454		6/29/2011	02:25:00	1.325	2.973	2.245	96.583	-2568	1856	NA	NA	473.426	2	A	-0.105046	11	4-5
20110628@278.asc	6-NC	4-6	-0.464406	0.38	31.3	0.18	25.655	0.48		6/29/2011	02:29:00	1.326	2.971	2.241	96.402	-2575	1867	NA	NA	482.843	2	A	-1.30109	11	4-6
20110628@279.asc	6-NC	4-7	-0.544406	0.3	31.22	0.18	25.579	0.39		6/29/2011	02:33:00	1.329	2.972	2.236	96.197	-2563	1874	NA	NA	490.466	1	A	0.479414	12	4-7
20110628@280.asc	6-NC	4-8	-0.484406	0.36	31.28	0.18	25.639	0.468		6/29/2011	02:37:00	1.33	2.992	2.25	96.786	-2577	1883	NA	NA	498.538	1	A	5.70582	12	4-8
20110628@281.asc	6-NC	4-9	0.0755944	0.92	31.86	0.18	26.207	0.478		6/29/2011	02:41:00	1.335	3.001	2.249	96.763	-2549	1893	NA	NA	512.439	1	A	-2.80061	12	4-9
20110628@282.asc	6-NC	4-10	-0.524406	0.32	31.24	0.18	25.597	0.364		6/29/2011	02:45:00	1.338	2.988	2.234	96.109	-2554	1908	NA	NA	525.444	3	A	1.41925	13	4-10
20110628@283.asc	6-NC	4-11	-0.494406	0.35	31.27	0.18	25.625	0.435		6/29/2011	02:49:00	1.337	2.992	2.238	96.308	-2532	1913	NA	NA	533.067	1	A	1.8704	13	4-11
20110628@284.asc	6-NC	4-12	-0.464406	0.38	31.31	0.18	25.66	0.54		6/29/2011	02:53:00	1.332	2.98	2.237	96.251	-2532	1925	NA	NA	544.278	2	A	1.41548	13	4-12
20110628@285.asc	UWC-3						6.952	0.44		2011-06-29	02:56:00	1.34094	3.10429	2.31501		-1804	70					C
20110628@286.asc	UWC-3						6.924	0.447		2011-06-29	03:00:00	1.34063	3.10038	2.31263		-1804	46					C
20110628@287.asc	UWC-3						6.913	0.429		2011-06-29	03:03:00	1.33891	3.10601	2.31981		-1804	22					C
20110628@288.asc	UWC-3						7.09	0.461		2011-06-29	03:07:00	1.33242	3.0817	2.31287		-1804	-2					C
							6.94725	0.175482	0.994526
20110628@289.asc	6-NC	4-14	-0.974406	-0.13	30.78	0.12	25.164	0.486		6/29/2011	03:11:00	1.313	2.941	2.241	96.575	-2519	1945	NA	NA	564.457	1	A	-3.17648	14	4-14
20110628@290.asc	6-NC	4-13	-0.684406	0.16	31.07	0.12	25.46	0.502		6/29/2011	03:18:00	1.311	2.958	2.257	97.276	-2503	1933	NA	NA	556.834	1	A	-1.78544	14	4-13
20110628@291.asc	6-NC	4-15	-0.544406	0.3	31.22	0.12	25.6	0.534		6/29/2011	03:21:00	1.313	2.94	2.238	96.475	-2498	1945	NA	NA	567.148	3	A	-2.37511	14	4-15
20110628@292.asc	6-NC	4-16	-0.0144056	0.83	31.76	0.12	26.145	0.374		6/29/2011	03:25:00	1.309	2.937	2.244	96.71	-2502	1957	NA	NA	577.461	1	A	4.51787	14	4-16
20110628@293.asc	6-NC	4-17	-0.914406	-0.07	30.83	0.12	25.22	0.784		6/29/2011	03:29:00	1.303	2.816	2.161	93.134	-2502	1969	NA	NA	589.121	5	A	-5.35652	15	4-17
20110628@294.asc	6-NC Transect 5	5-1	-1.16441	-0.32	30.58	0.12	24.969	0.559		6/29/2011	03:35:00	1.296	2.894	2.233	96.258	-1705	1894	NA	NA	576.116	1	A	4.7377	14	5-1
20110628@295.asc	6-NC Transect 5	5-2	-0.594406	0.25	31.16	0.12	25.55	0.512		6/29/2011	03:39:00	1.298	2.916	2.246	96.821	-1719	1899	NA	NA	579.704	3	A	5.0825	14	5-2
20110628@296.asc	6-NC	5-3	-0.934406	-0.09	30.81	0.12	25.2	0.494		6/29/2011	03:43:00	1.3	2.87	2.207	95.134	-1713	1909	NA	NA	589.569	3	A	-6.02169	15	5-3
20110628@297.asc	6-NC	5-4	-0.664406	0.18	31.1	0.12	25.486	0.543		6/29/2011	03:47:00	1.298	2.932	2.26	97.398	-1695	1914	NA	NA	594.798	2	A	-4.48769	15	5-4
20110628@298.asc	6-NC	5-5	-0.454406	0.39	31.32	0.12	25.701	0.463		6/29/2011	03:50:00	1.293	2.915	2.255	97.203	-1690	1924	NA	NA	605.314	2	A	4.56732	15	5-5
20110628@299.asc	UWC-3						6.963	0.448		2011-06-29	03:54:00	1.30652	3.0519	2.3359		-1695	106					C
20110628@300.asc	UWC-3 Cs-199						7.048	0.515		2011-06-29	03:58:00	1.34255	3.14173	2.34013		-1695	82					C
20110628@301.asc	UWC-3						6.957	0.459		2011-06-29	04:01:00	1.36308	3.15695	2.31604		-1683	58					C
20110628@302.asc	UWC-3						6.967	0.453		2011-06-29	04:05:00	1.36547	3.15115	2.30774		-1663	54					C
							6.97675	0.121973	0.994555
20110628@303.asc	6-NC	5-6	-0.844406	0	30.91	0.12	25.285	0.483		6/29/2011	04:10:00	1.356	3.099	2.285	98.617	-1692	1939	NA	NA	621.239	1	A	-5.17914	16	5-6
20110628@304.asc	6-NC	5-7	-0.674406	0.17	31.08	0.12	25.451	0.466		6/29/2011	04:13:00	1.365	3.049	2.234	96.421	-1681	1947	NA	NA	630.253	2	A	0.51132	16	5-7
20110628@305.asc	6-NC	5-8	-0.834406	0.01	30.92	0.12	25.292	0.461		6/29/2011	04:18:00	1.369	3.04	2.221	95.855	-1676	1960	NA	NA	642.272	1	A	3.64032	16	5-8
20110628@306.asc	6-NC	5-9	-0.324406	0.52	31.44	0.12	25.81	0.508		6/29/2011	04:21:00	1.376	3.094	2.248	97.017	-1659	1966	NA	NA	646.779	2	A	0.719491	17	5-9
20110628@307.asc	6-NC	5-10	-0.404406	0.44	31.37	0.12	25.735	0.479		6/29/2011	04:26:00	1.379	3.079	2.233	96.354	-1654	1978	NA	NA	658.798	2	A	-2.91712	17	5-10
20110628@308.asc	6-NC	5-11	-0.354406	0.49	31.41	0.12	25.781	0.487		6/29/2011	04:29:00	1.379	3.08	2.233	96.363	-1674	1984	NA	NA	666.911	2	A	1.95272	17	5-11
20110628@309.asc	6-NC	5-12	-0.554406	0.29	31.21	0.12	25.582	0.514		6/29/2011	04:33:00	1.377	3.067	2.227	96.099	-1658	1996	NA	NA	676.526	3	A	2.74181	17	5-12
20110628@310.asc	6-NC	5-13	-0.644406	0.2	31.12	0.12	25.489	0.349		6/29/2011	04:37:00	1.376	3.083	2.24	96.652	-1656	2008	NA	NA	688.845	3	A	-0.148311	17	5-13
20110628@311.asc	6-NC	5-14	-0.874406	-0.03	30.88	0.12	25.247	0.533		6/29/2011	04:41:00	1.376	3.078	2.237	96.523	-1647	2020	NA	NA	699.963	1	A	-5.41139	18	5-14
20110628@312.asc	6-NC	5-15	-0.434406	0.41	31.33	0.12	25.7	0.41		6/29/2011	04:45:00	1.377	3.077	2.234	96.415	-1637	2030	NA	NA	711.681	3	A	5.00251	18	5-15
20110628@313.asc	6-NC	5-16	-0.844406	0	30.91	0.12	25.282	0.557		6/29/2011	04:48:00	1.377	3.084	2.239	96.632	-1632	2040	NA	NA	720.395	2	A	1.65456	18	5-16
20110628@314.asc	UWC-3						6.905	0.419		2011-06-29	04:52:00	1.38925	3.19785	2.30185		-1601	-17
20110628@315.asc	UWC-3						6.902	0.439		2011-06-29	04:55:00	1.38804	3.20668	2.31022		-1580	-24					C
20110628@316.asc	UWC-3						6.905	0.424		2011-06-29	04:58:00	1.3914	3.21794	2.31273		-1600	-36					C
20110628@317.asc	UWC-3						7.041	0.489		2011-06-29	05:02:00	1.38655	3.20679	2.31278		-1582	-38					C
							6.961	0.116565	0.994539
20110628@318.asc	6-NC	5-17	-0.534406	0.31	31.23	0.17	25.552	0.484		6/29/2011	05:06:00	1.384	3.094	2.237	96.394	-1674	1920	NA	NA	601.709	1	A	2.59671	15	5-17
20110628@319.asc	6-NC	5-18	-0.374406	0.47	31.39	0.17	25.709	0.434		6/29/2011	05:09:00	1.381	3.093	2.239	96.51	-1673	1935	NA	NA	615.53	2	A	-0.333881	15	5-18
20110628@320.asc	6-NC	5-19	-0.734406	0.11	31.03	0.17	25.345	0.452		6/29/2011	05:13:00	1.368	3.063	2.238	96.473	-1645	1946	NA	NA	629.052	3	A	-1.84646	16	5-19
20110628@321.asc	6-NC	5-20	-0.664406	0.18	31.09	0.17	25.414	0.524		6/29/2011	05:17:00	1.358	3.036	2.237	96.392	-1634	1972	NA	NA	656.094	1	A	-3.95067	17	5-20
20110628@322.asc	6-NC	5-21	-0.384406	0.46	31.39	0.17	25.704	0.509		6/29/2011	05:21:00	1.357	3.044	2.243	96.677	-1627	1986	NA	NA	667.512	3	A	1.81239	17	5-21
20110628@323.asc	6-NC	5-22	-0.524406	0.32	31.24	0.17	25.563	0.451		6/29/2011	05:24:00	1.356	3.058	2.256	97.212	-1622	1996	NA	NA	678.329	2	A	1.83448	17	5-22
20110628@324.asc	6-NC	5-23	-0.894406	-0.05	30.86	0.17	25.177	0.442		6/29/2011	05:28:00	1.355	3.055	2.255	97.174	-1622	2009	NA	NA	689.146	1	A	-0.791405	17	5-23
20110628@325.asc	6-NC	5-24	-0.774406	0.07	30.99	0.17	25.305	0.499		6/29/2011	05:31:00	1.354	3.046	2.249	96.948	-1618	2022	NA	NA	702.967	2	A	-0.727024	18	5-24
20110628@326.asc	6-NC	5-25	-1.02441	-0.18	30.72	0.17	25.045	0.588		6/29/2011	05:35:00	1.355	3.033	2.238	96.456	-1614	2032	NA	NA	712.582	3	A	5.63163	18	5-25
20110628@327.asc	6-NC	5-26	-1.00441	-0.16	30.75	0.17	25.07	0.512		6/29/2011	05:39:00	1.353	3.028	2.238	96.452	-1620	2050	NA	NA	731.813	1	A	-1.54688	18	5-26
20110628@328.asc	6-NC	5-27	-0.834406	0.01	30.92	0.17	25.24	0.435		6/29/2011	05:43:00	1.351	3.015	2.232	96.206	-1616	2060	NA	NA	739.625	3	A	0.18077	18	5-27
20110628@329.asc	6-NC	5-28	-1.11441	-0.27	30.63	0.17	24.956	0.477		6/29/2011	05:46:00	1.35	3.049	2.259	97.349	-1606	2072	NA	NA	752.545	1	A	3.17482	19	5-28
20110628@330.asc	6-NC	5-29	-0.644	0.205672	31.122	0.16857	25.441	0.533		2011-06-29	05:50:00	1.35373	3.02073	2.2314	96.1694	-1559	2086	NA	NA	776.685	1	A	-4.89342	20	5-29
20110628@331.asc	UWC-3						6.913	0.432		2011-06-29	05:54:00	1.36856	3.20244	2.34001		-1651	136					C
20110628@332.asc	UWC-3						6.764	0.478		2011-06-29	05:57:00	1.36903	3.17331	2.31793		-1657	114					C
20110628@333.asc	UWC-3						6.86	0.48		2011-06-29	06:01:00	1.36097	3.18397	2.33948		-1633	129					C
20110628@334.asc	UWC-3						7.003	0.417		2011-06-29	06:04:00	1.37317	3.19573	2.32726		-1635	108					C
							6.91163	0.16857	0.99449
20110628@335.asc	6-NC Transect 2	2-15	-0.674406	0.17	31.09	0.14	25.396	0.439		6/29/2011	06:11:00	1.372	3.072	2.239	96.17	-3994	1680	NA	NA	166.251	1	A	-1.55304	5	2-15
20110628@336.asc	6-NC Transect 2	2-16	-0.464406	0.38	31.31	0.14	25.611	0.602		6/29/2011	06:14:00	1.366	3.027	2.215	95.152	-3989	1692	NA	NA	176.565	3	A	-0.011762	5	2-16
20110628@337.asc	6-NC	2-17	-0.794406	0.05	30.96	0.14	25.272	0.43		6/29/2011	06:18:00	1.358	3.047	2.244	96.374	-3984	1704	NA	NA	189.121	2	A	-0.184953	5	2-17
20110628@338.asc	6-NC	2-18	-0.924406	-0.08	30.83	0.14	25.138	0.472		6/29/2011	06:21:00	1.356	3.043	2.245	96.42	-3979	1716	NA	NA	202.125	1	A	0.845624	5	2-18
20110628@339.asc	6-NC	2-19	-0.894406	-0.05	30.86	0.14	25.167	0.476		6/29/2011	06:25:00	1.354	3.03	2.238	96.125	-3979	1728	NA	NA	213.336	2	A	2.93125	5	2-19
20110628@340.asc	6-NC	2-20	-0.654406	0.19	31.1	0.14	25.41	0.451		6/29/2011	06:28:00	1.353	3.046	2.251	96.686	-3963	1740	NA	NA	226.34	1	A	-4.81126	6	2-20
20110628@341.asc	6-NC	2-21	-0.0144056	0.83	31.77	0.14	26.069	0.547		6/29/2011	06:32:00	1.357	3.04	2.24	96.214	-3963	1751	NA	NA	236.206	1	A	-0.558189	6	2-21
20110628@342.asc	6-NC	2-22	-0.434406	0.41	31.34	0.14	25.643	0.415		6/29/2011	06:35:00	1.354	3.061	2.262	97.141	-3957	1763	NA	NA	248.762	4	A	2.32842	6	2-22
20110628@343.asc	6-NC	2-23	-0.594406	0.25	31.17	0.14	25.473	0.438		6/29/2011	06:39:00	1.354	3.058	2.258	96.983	-3961	1775	NA	NA	259.973	2	A	-0.992788	6	2-23
20110628@344.asc	6-NC	2-24	-1.16441	-0.32	30.58	0.14	24.894	0.433		6/29/2011	06:42:00	1.351	3.054	2.261	97.123	-3958	1788	NA	NA	272.977	2	A	-0.964881	6	2-24
20110628@345.asc	6-NC	2-25	-0.734406	0.11	31.02	0.14	25.327	0.465		6/29/2011	06:46:00	1.348	3.06	2.269	97.471	-3937	1796	NA	NA	282.843	3	A	-0.659739	7	2-25
20110628@346.asc	6-NC	2-26	-0.324406	0.52	31.44	0.14	25.748	0.449		6/29/2011	06:49:00	1.351	3.052	2.26	97.07	-3932	1808	NA	NA	295.847	3	A	0.599451	7	2-26
20110628@347.asc	UWC-3						6.912	0.473		2011-06-29	06:53:00	1.36899	3.1888	2.32931		-1737	64					C
20110628@348.asc	UWC-3						6.868	0.466		2011-06-29	06:56:00	1.36676	3.18092	2.32735		-1747	46					C
20110628@349.asc	UWC-3						6.953	0.458		2011-06-29	06:59:00	1.36375	3.17316	2.3268		-1721	49					C
20110628@350.asc	UWC-3						6.923	0.424		2011-06-29	07:03:00	1.36347	3.15903	2.3169		-1737	28					C
							6.8995	0.142183	0.994478
20110628@351.asc	6-NC Transect 4	4-18	-1.62441	-0.78	30.11	0.17	24.446	0.458		6/29/2011	07:09:00	1.348	2.912	2.16	92.398	-2530	1845	NA	NA	466.699	4	A	-2.19175	11	4-18
20110628@352.asc	6-NC Transect 4	4-19	-2.24441	-1.4	29.47	0.17	23.809	0.73		6/29/2011	07:13:00	1.346	2.927	2.174	92.995	-2518	1857	NA	NA	479.255	4	A	1.8423	11	4-19
20110628@353.asc	6-NC	4-20	-0.624406	0.22	31.14	0.17	25.469	0.401		6/29/2011	07:17:00	1.341	3.036	2.265	96.865	-2512	1871	NA	NA	492.26	2	A	1.94426	12	4-20
20110628@354.asc	6-NC	4-21	-0.714406	0.13	31.05	0.17	25.379	0.459		6/29/2011	07:20:00	1.342	3.044	2.268	97.018	-2512	1883	NA	NA	504.816	2	A	2.67596	12	4-21
20110628@355.asc	6-NC	4-22	-2.94441	-2.1	28.75	0.17	23.089	0.887		6/29/2011	07:23:00	1.342	2.818	2.1	89.819	-2500	1895	NA	NA	518.269	5	A	-2.57546	13	4-22
20110628@356.asc	6-NC	4-23	-0.314406	0.53	31.45	0.17	25.782	0.49		6/29/2011	07:27:00	1.332	2.997	2.251	96.285	-2488	1913	NA	NA	536.654	1	A	0.183432	13	4-23
20110628@357.asc	6-NC	4-24	-0.424406	0.42	31.34	0.17	25.667	0.47		6/29/2011	07:30:00	1.321	2.967	2.246	96.063	-2458	1923	NA	NA	549.21	2	A	0.625318	13	4-24
20110628@358.asc	6-NC	4-25	-1.95441	-1.11	29.76	0.17	24.099	0.528		6/29/2011	07:34:00	1.315	2.966	2.255	96.44	-2469	1939	NA	NA	565.354	4	A	-3.28658	14	4-25
20110628@359.asc	6-NC	4-26	-0.204406	0.64	31.57	0.17	25.896	0.478		6/29/2011	07:37:00	1.31	2.973	2.27	97.081	-2458	1960	NA	NA	585.533	1	A	0.495451	14	4-26
20110628@360.asc	6-NC	4-27	-0.484406	0.36	31.29	0.17	25.615	0.501		6/29/2011	07:41:00	1.309	2.959	2.26	96.667	-2431	1975	NA	NA	600.357	1	A	1.37239	15	4-27
20110628@361.asc	UWC-3						6.928	0.478		2011-06-29	07:44:00	1.31861	3.10108	2.35179		-1406	51					C
20110628@362.asc	UWC-3						6.957	0.466		2011-06-29	07:48:00	1.32733	3.13222	2.35979		-1406	37					C
20110628@363.asc	UWC-3						6.764	0.44		2011-06-29	07:51:00	1.33308	3.14024	2.35562		-1410	21					C
20110628@364.asc	UWC-3						7.073	0.459		2011-06-29	07:54:00	1.34	3.12974	2.33562		-1412	4					C
							6.92225	0.174034	0.994501
The analysis names refer to the three chips within the same epoxy round or the standard mount, only the medium piece of 89-39 was discussed because of the longest continous record of growth sampled. ʕ δ18OVPDB value adjusted for the difference in IMF between calcite and aragonite for the 2014 (-0.57‰) and 2011 (-0.81‰) sessions. * Conversion of the standard reference: δ18OVPDB = (δ18OVSMOW - 30.9…
