# Supplementary material for: Oxygen Isotope Variability within Nautilus Shell Growth Bands
Source: PLoS One. 2016 Apr 21;11(4):e0153890. doi: 10.1371/journal.pone.0153890 (PMC4839723; doi:10.1371/journal.pone.0153890)

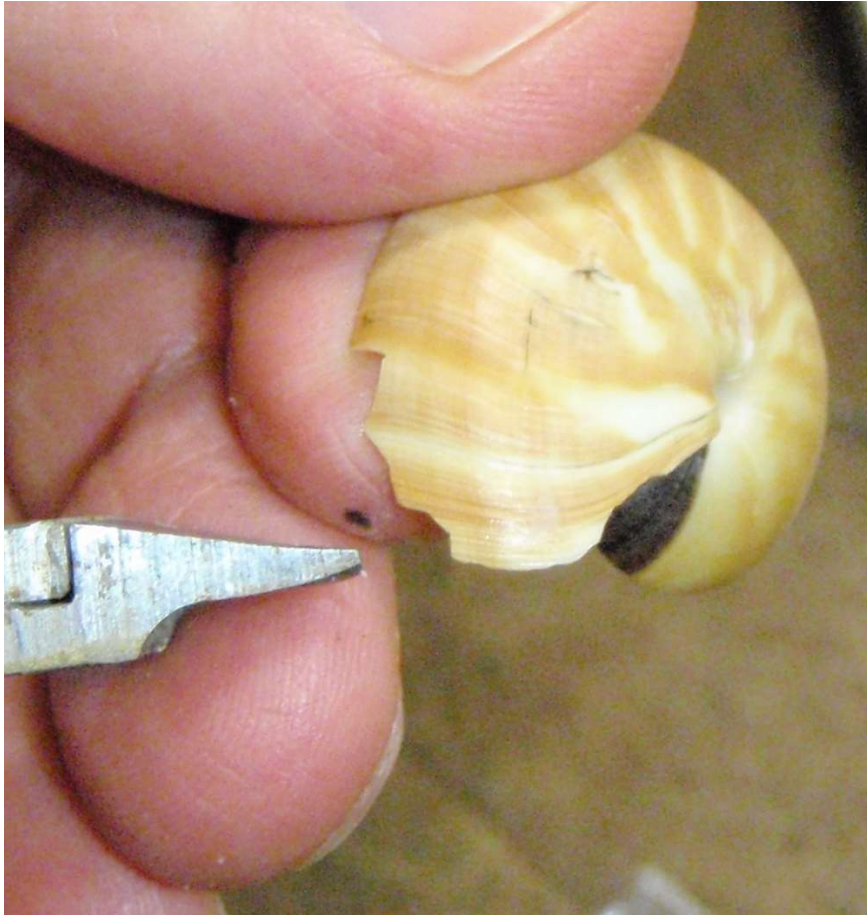

Indicating the location where the chip of *Nautilus belauensis* (AMNH 102555) was removed near the aperture.

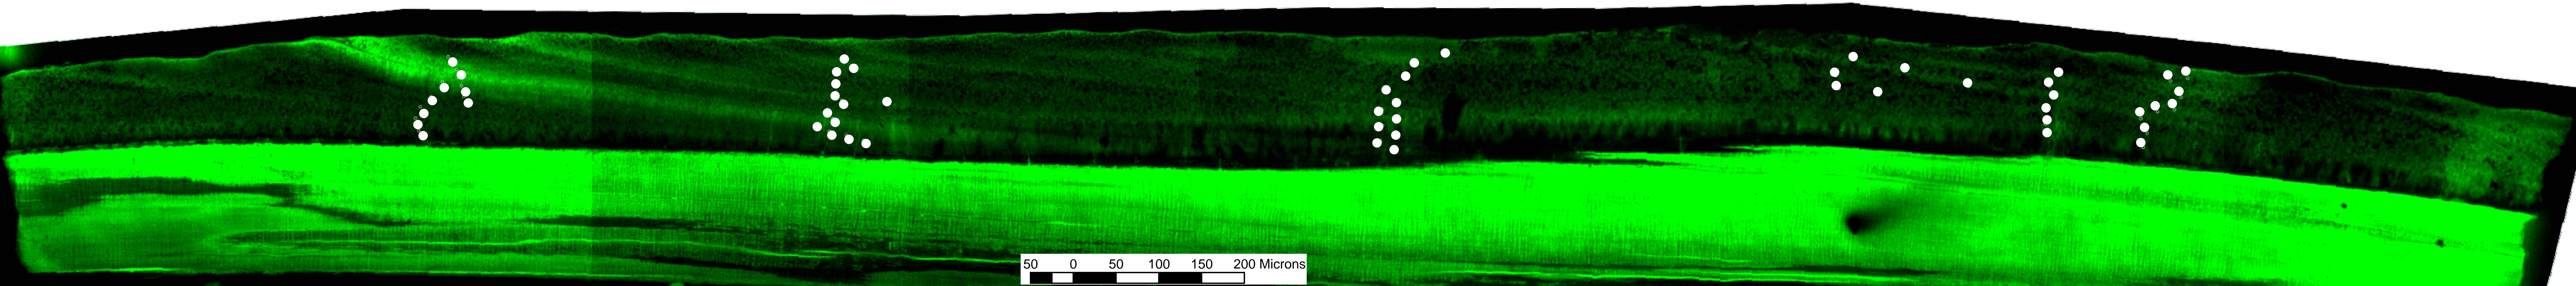

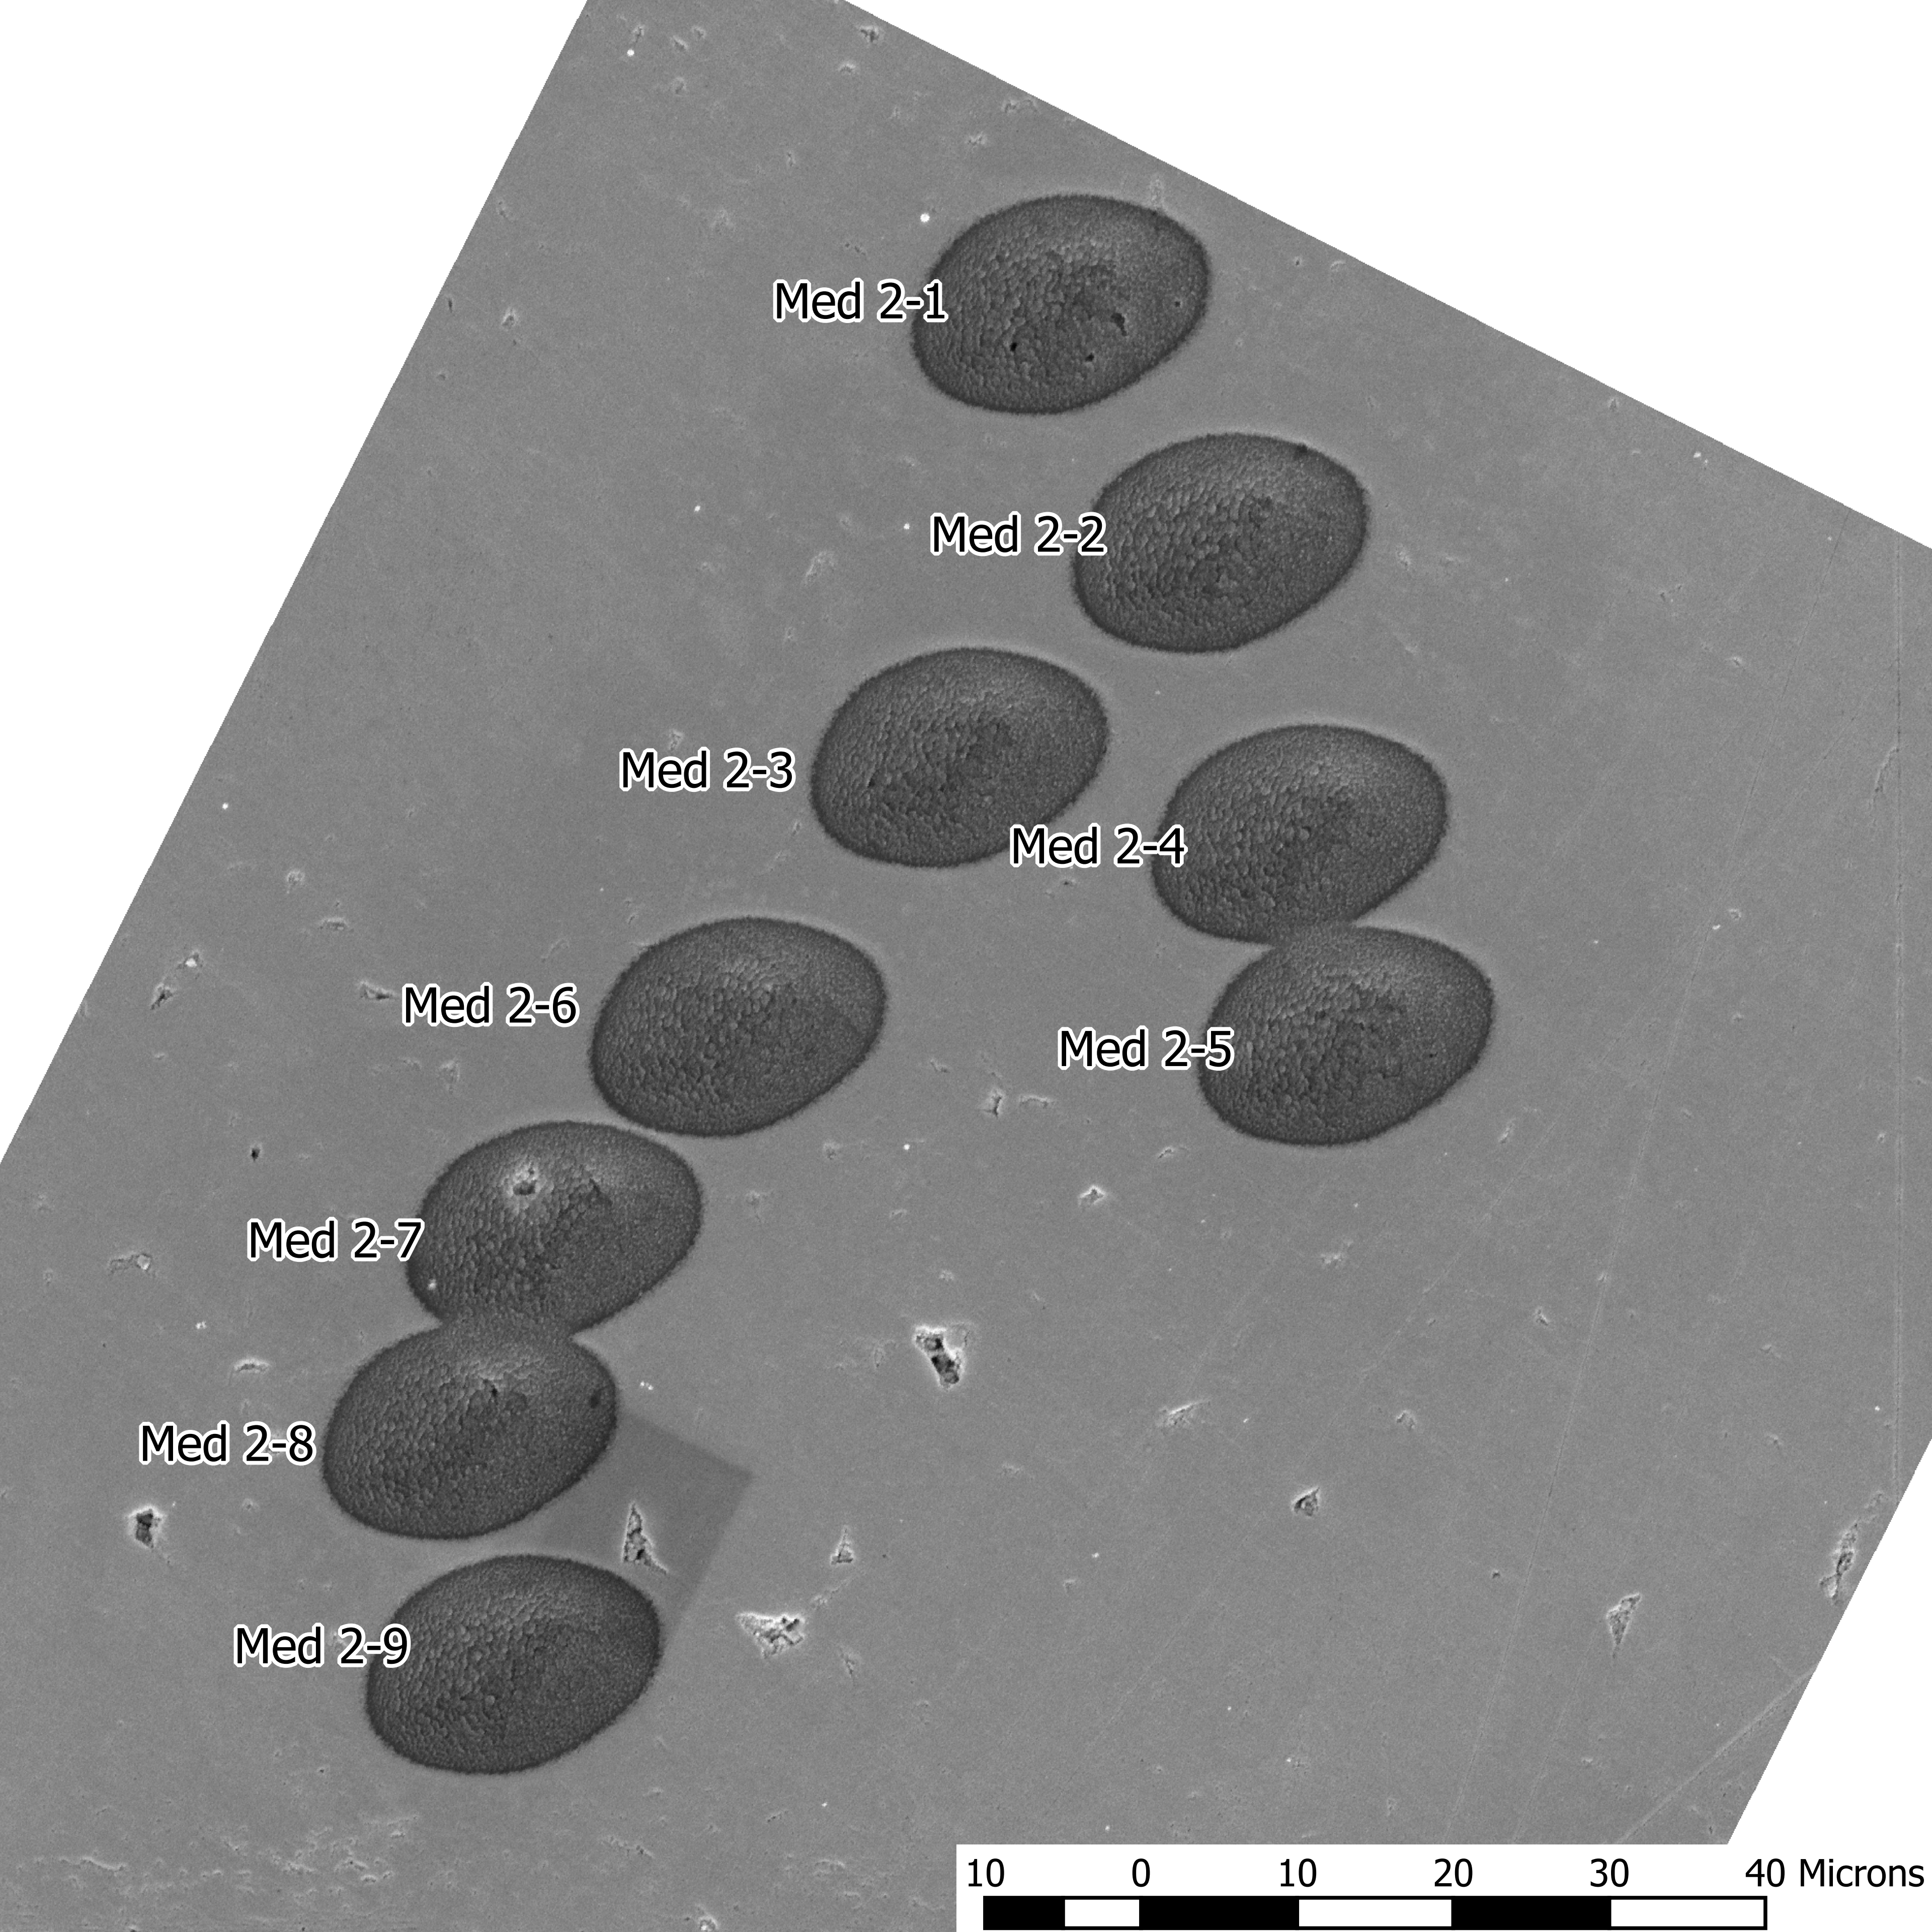

Med 2-1

Med 2-2

Med 2-3

Med 2-4

Med 2-6

Med 2-5

Med 2-7

Med 2-8

Med 2-9

10 0 10 20 30 40 Microns

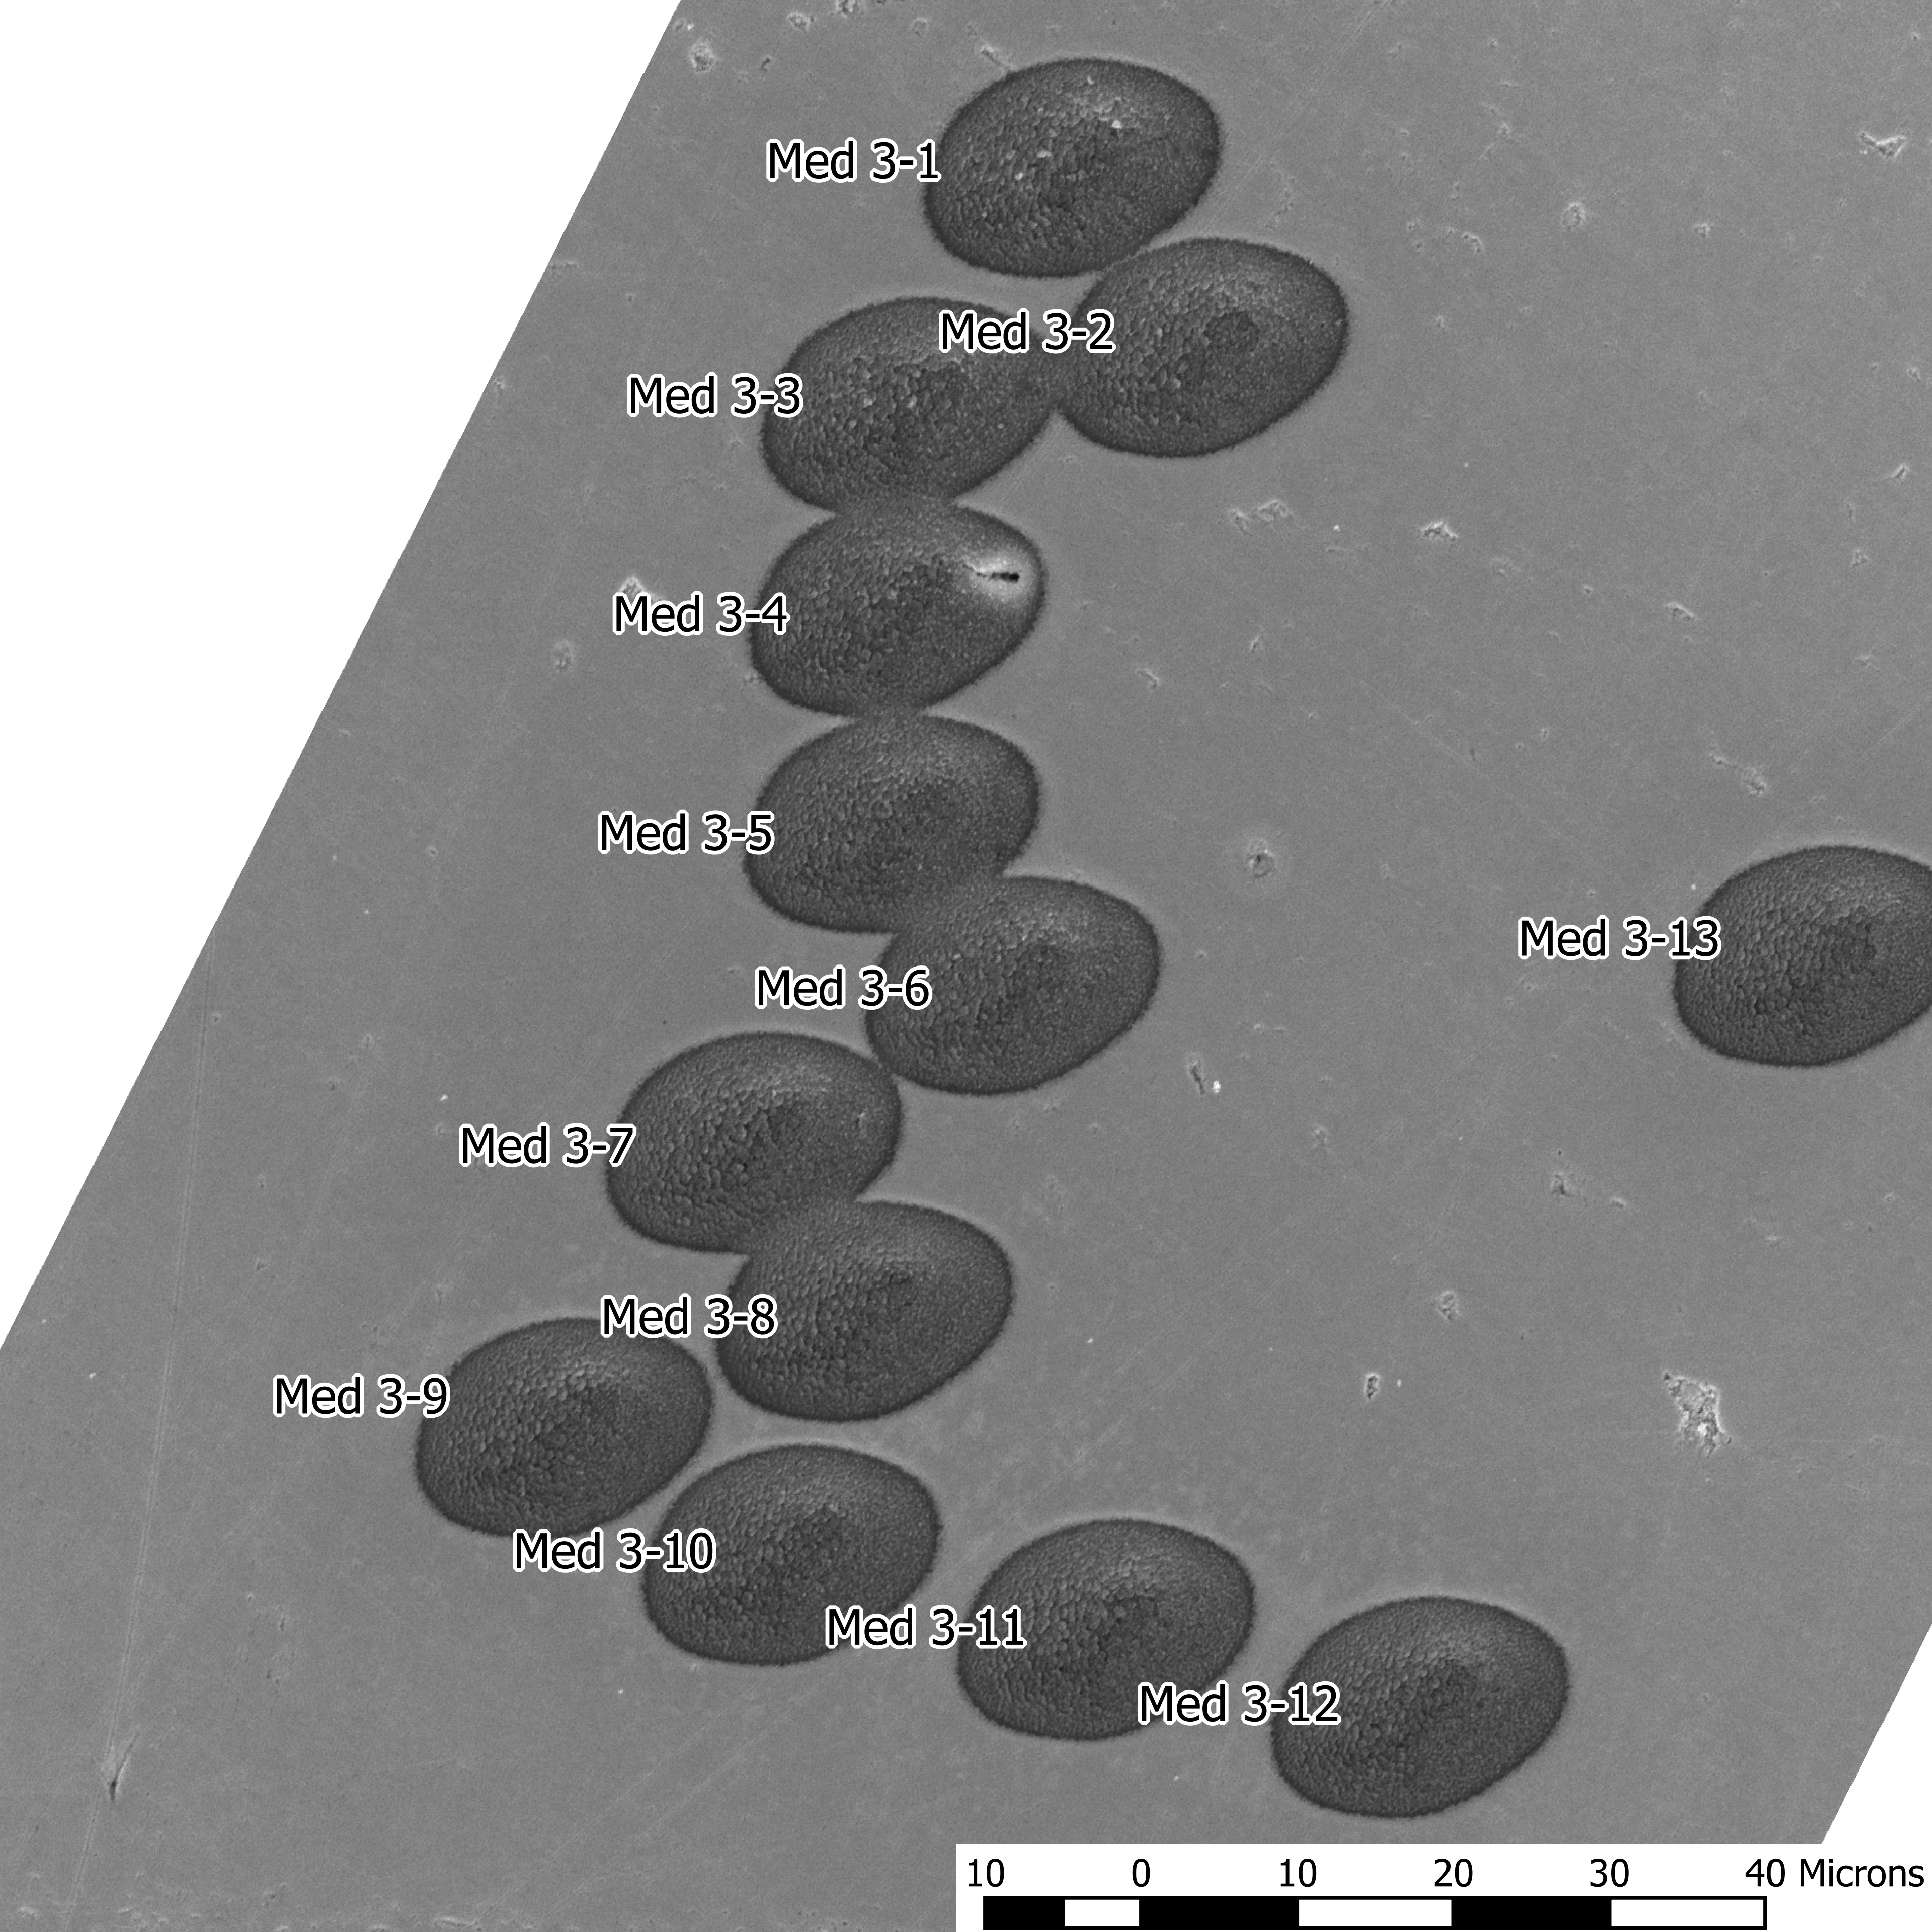

Med 3-1

Med 3-2

Med 3-3

Med 3-4

Med 3-5

Med 3-6

Med 3-13

Med 3-7

Med 3-8

Med 3-9

Med 3-10

Med 3-11

Med 3-12

10 0 10 20 30 40 Microns

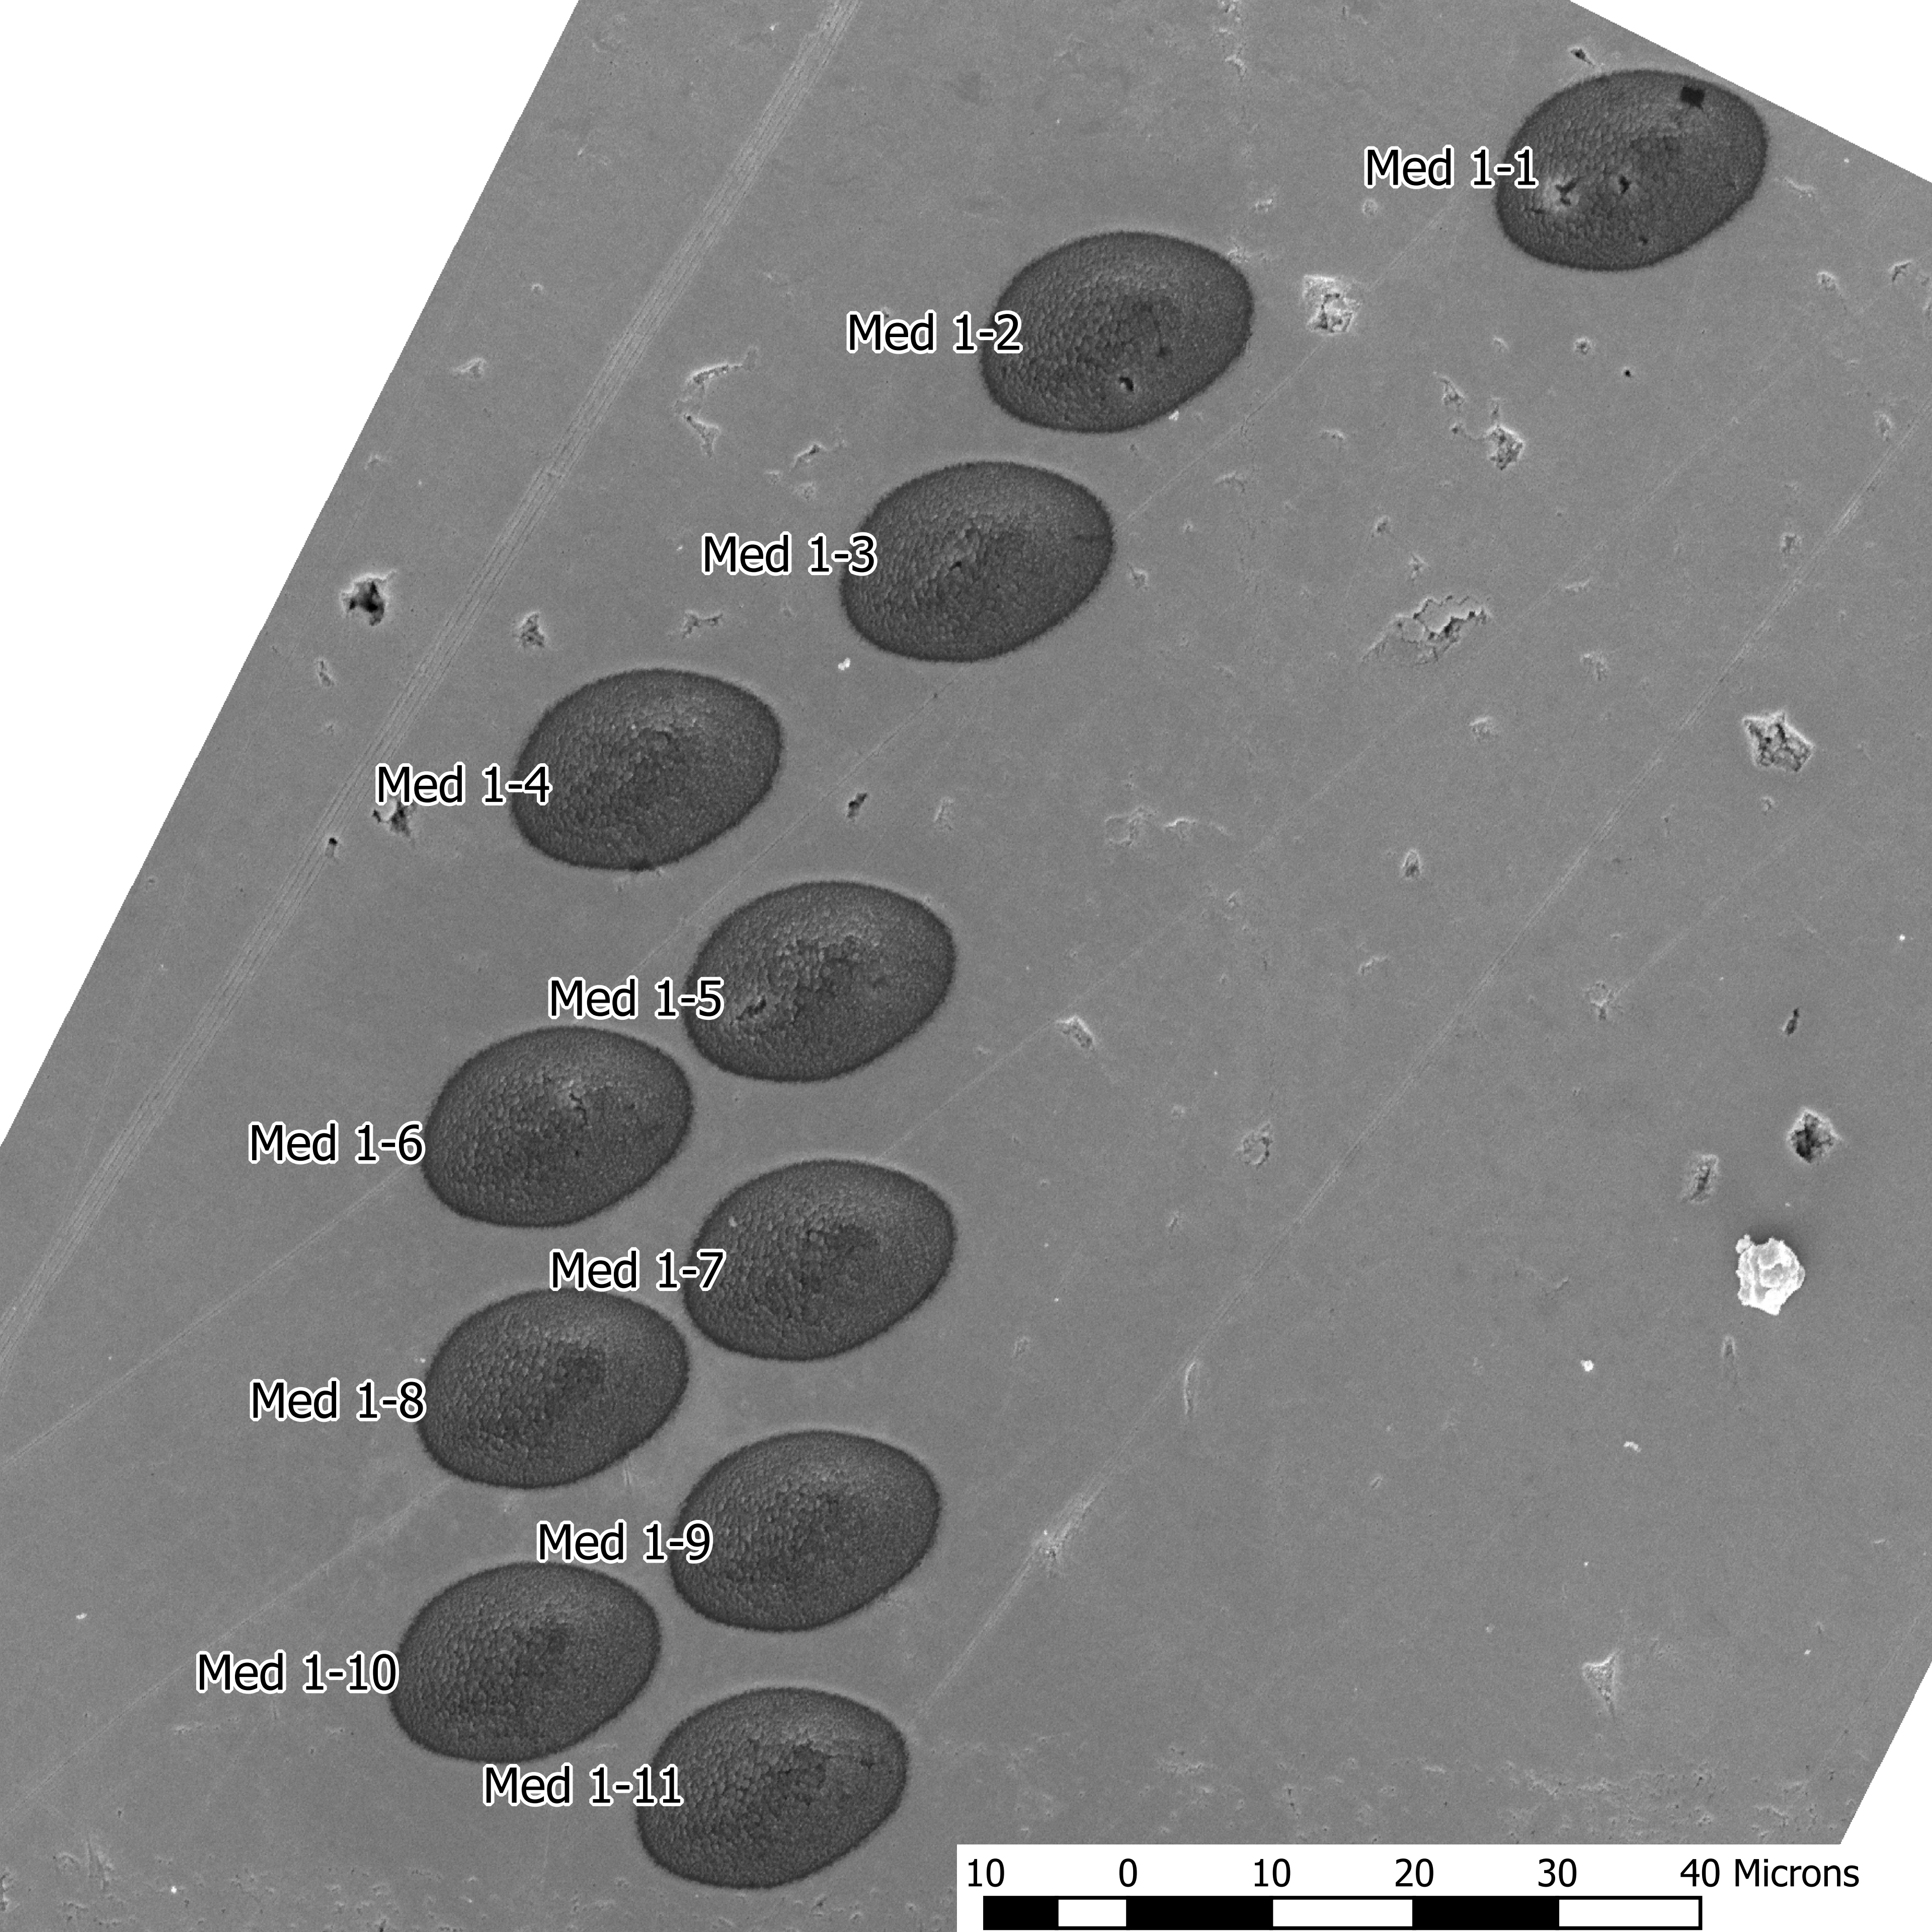

Med 1-1

Med 1-2

Med 1-3

Med 1-4

Med 1-5

Med 1-6

Med 1-7

Med 1-8

Med 1-9

Med 1-10

Med 1-11

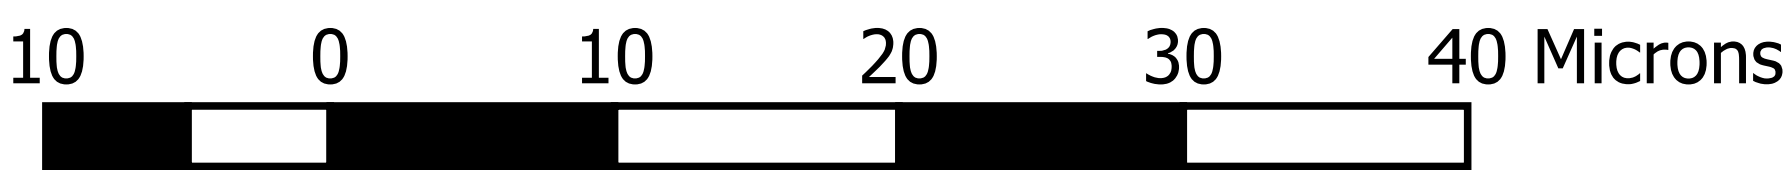

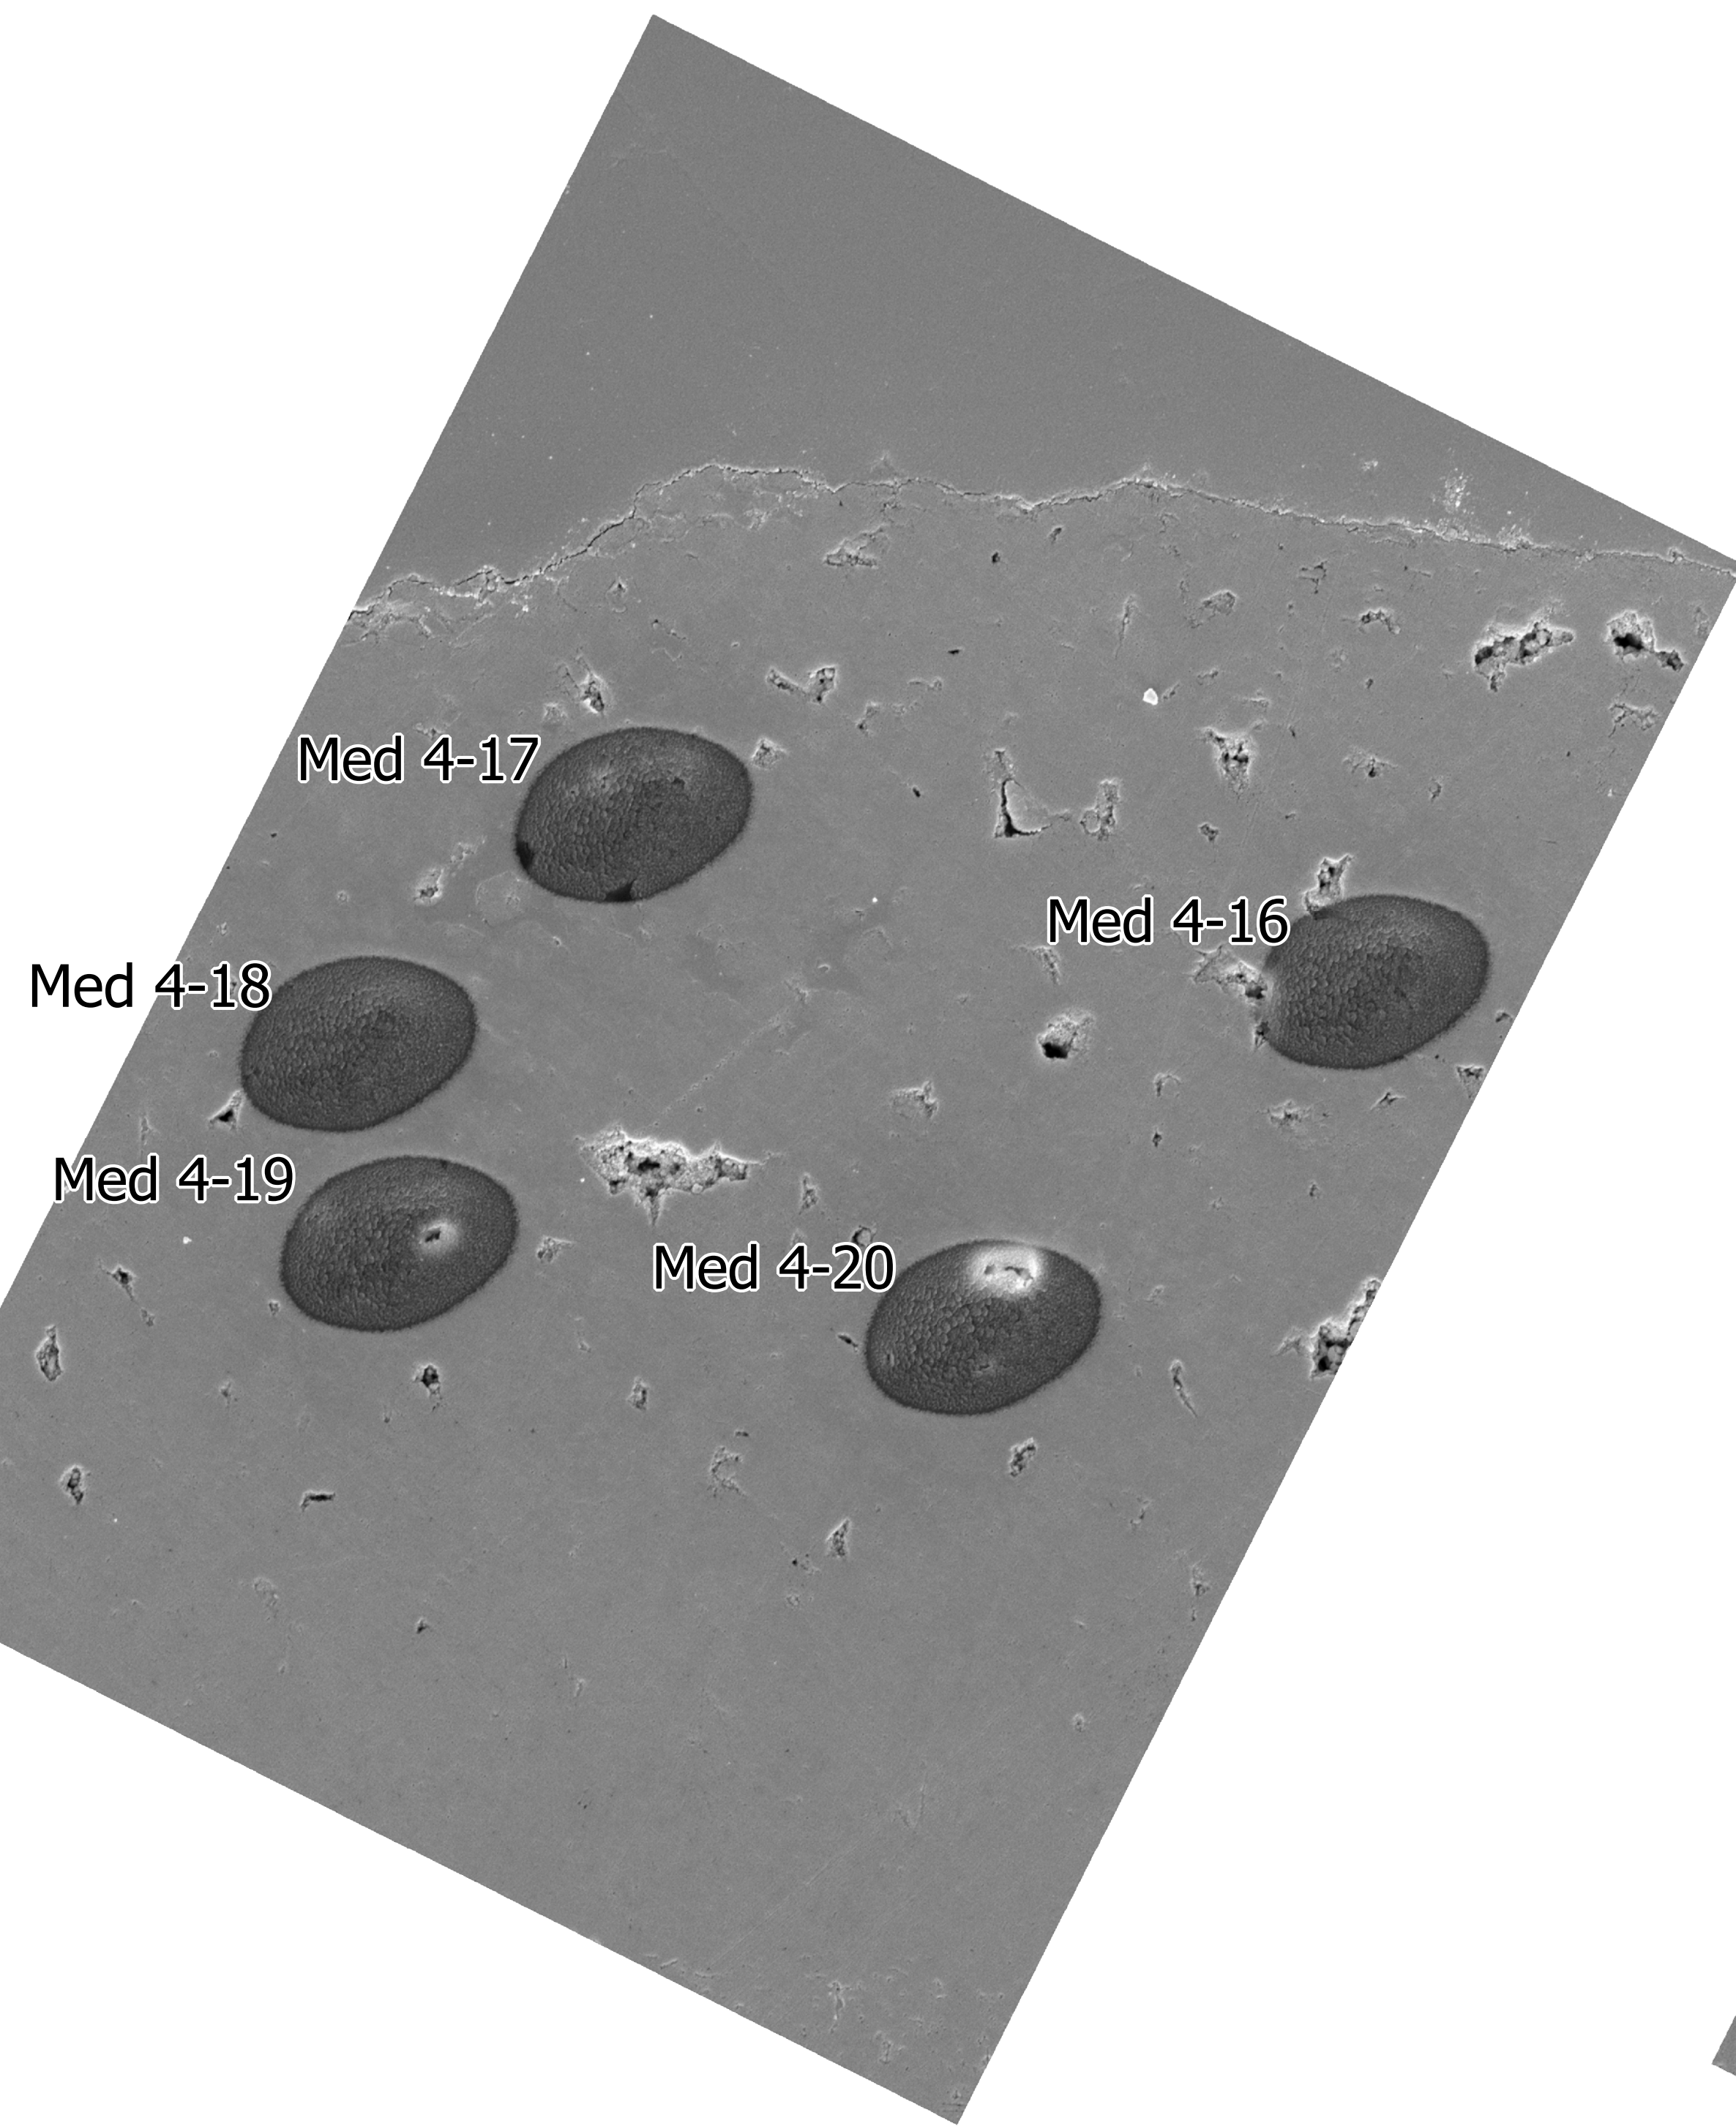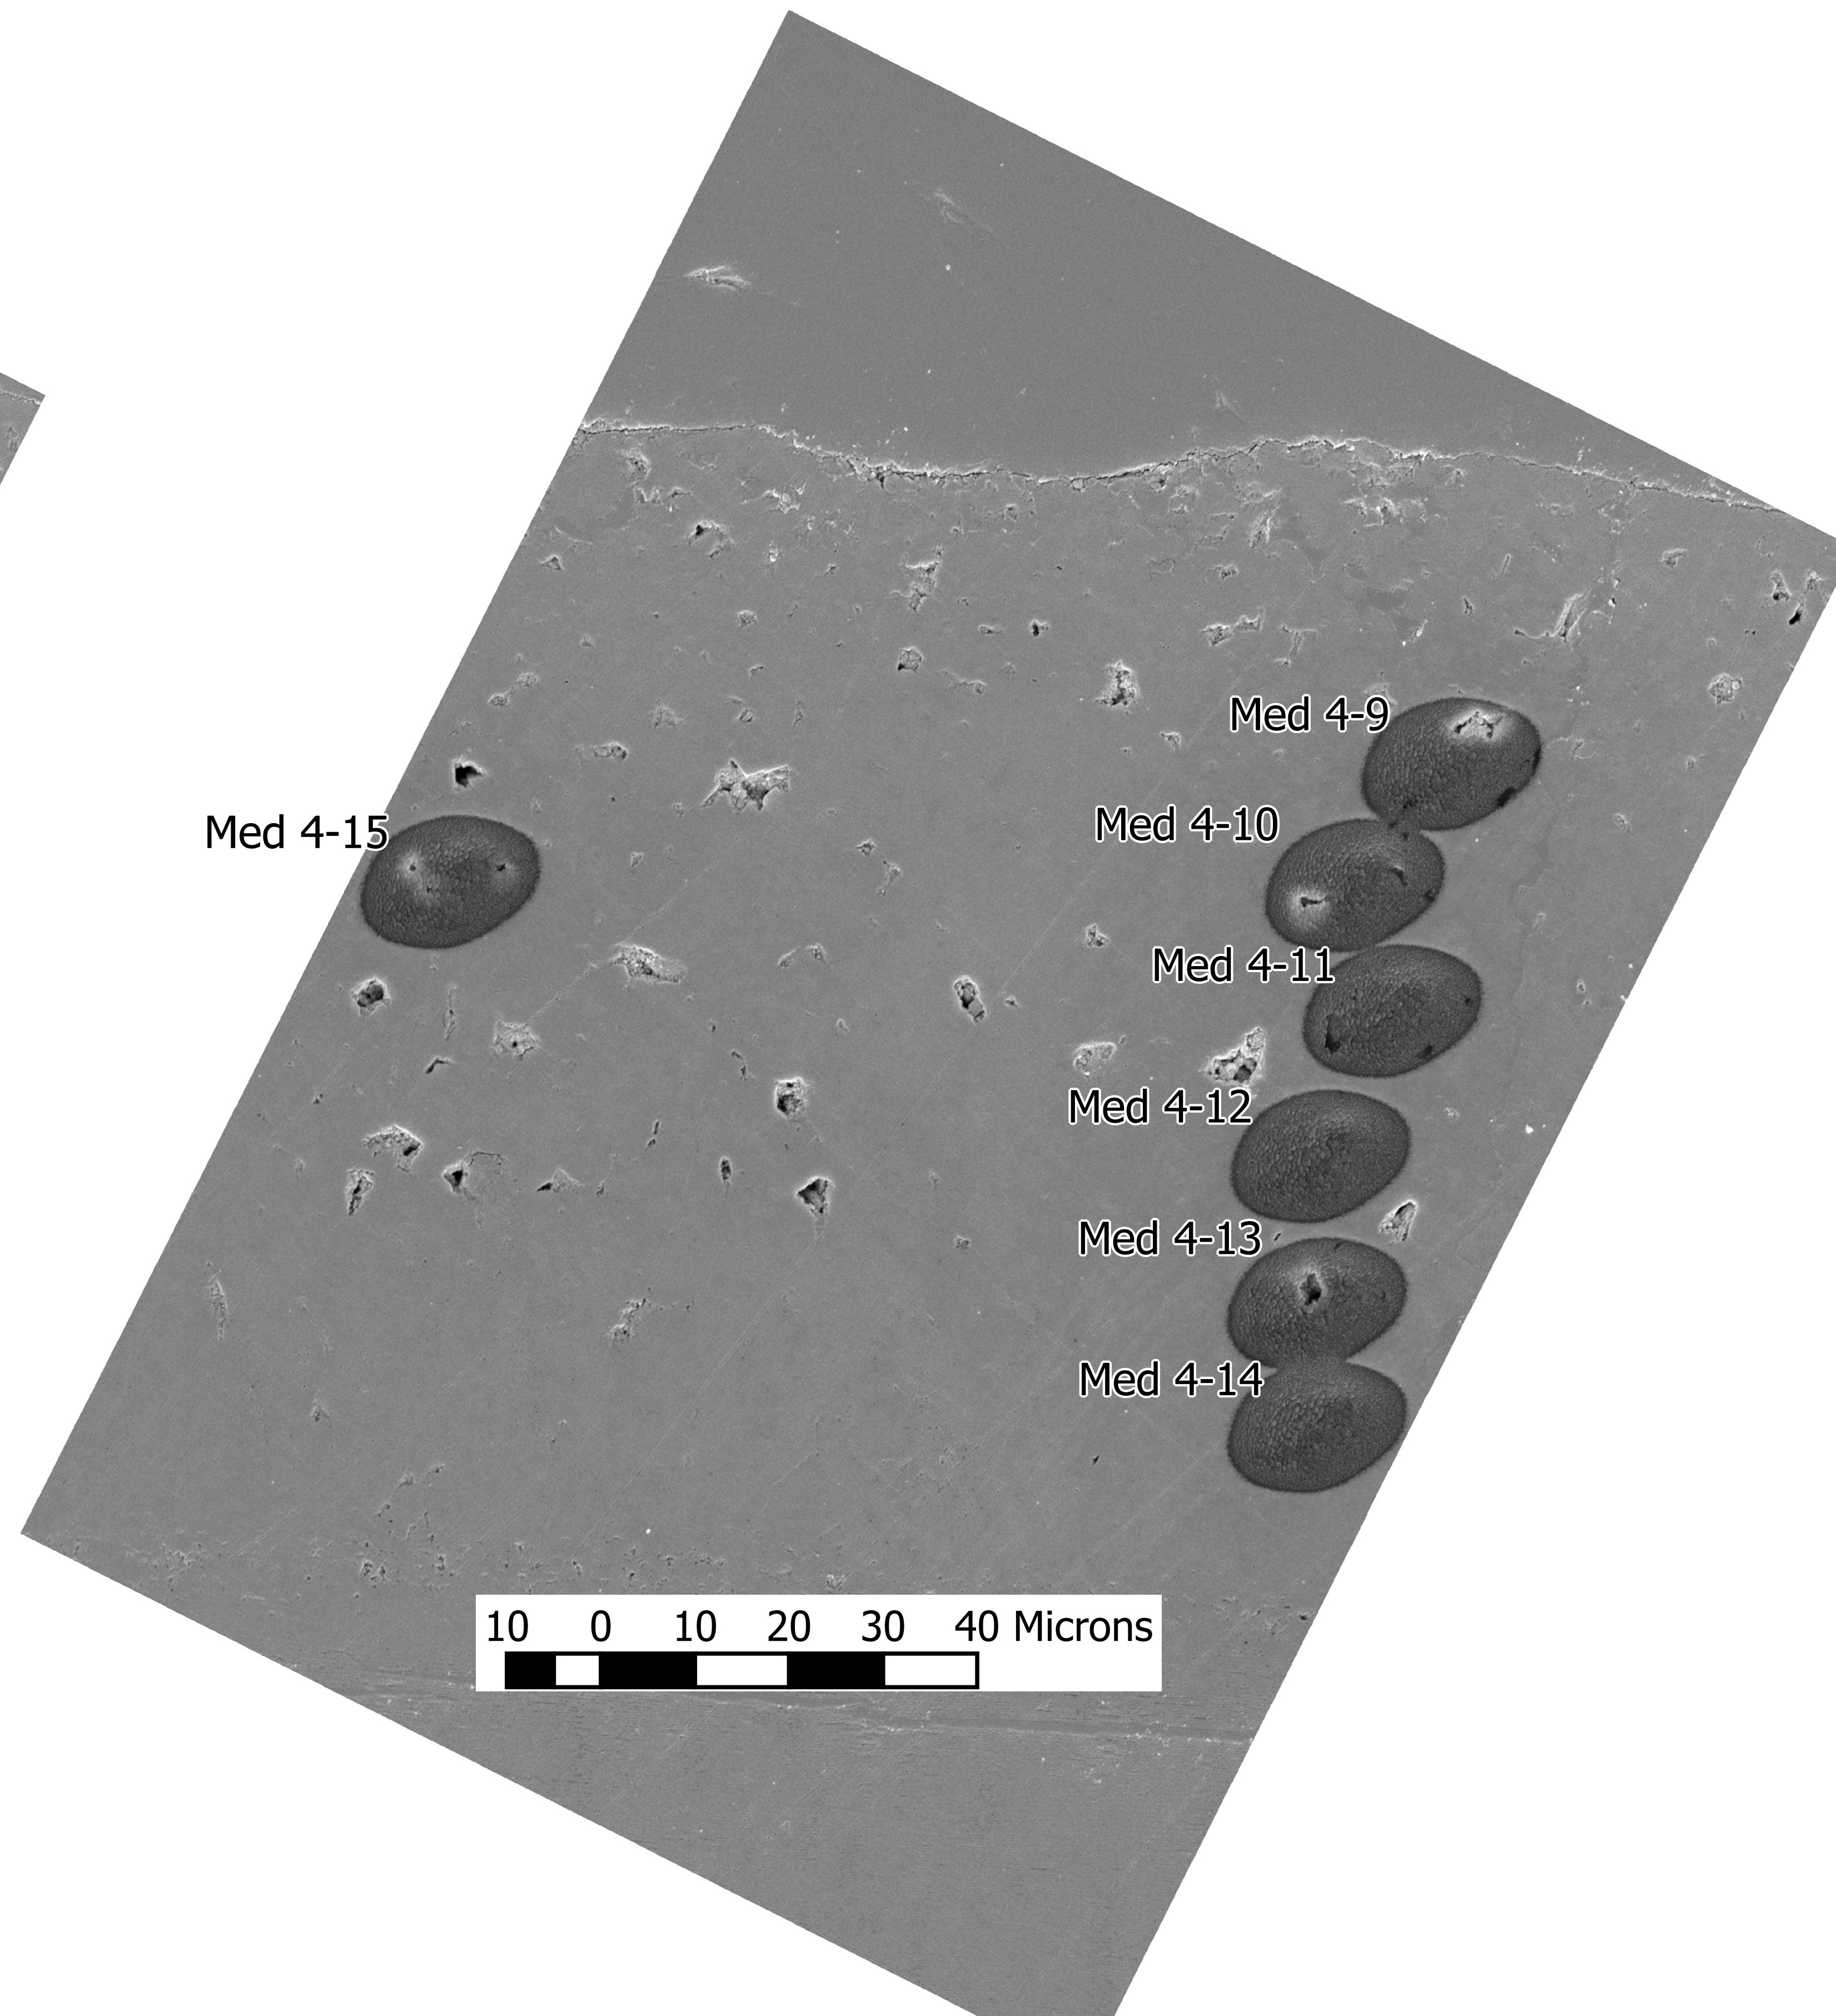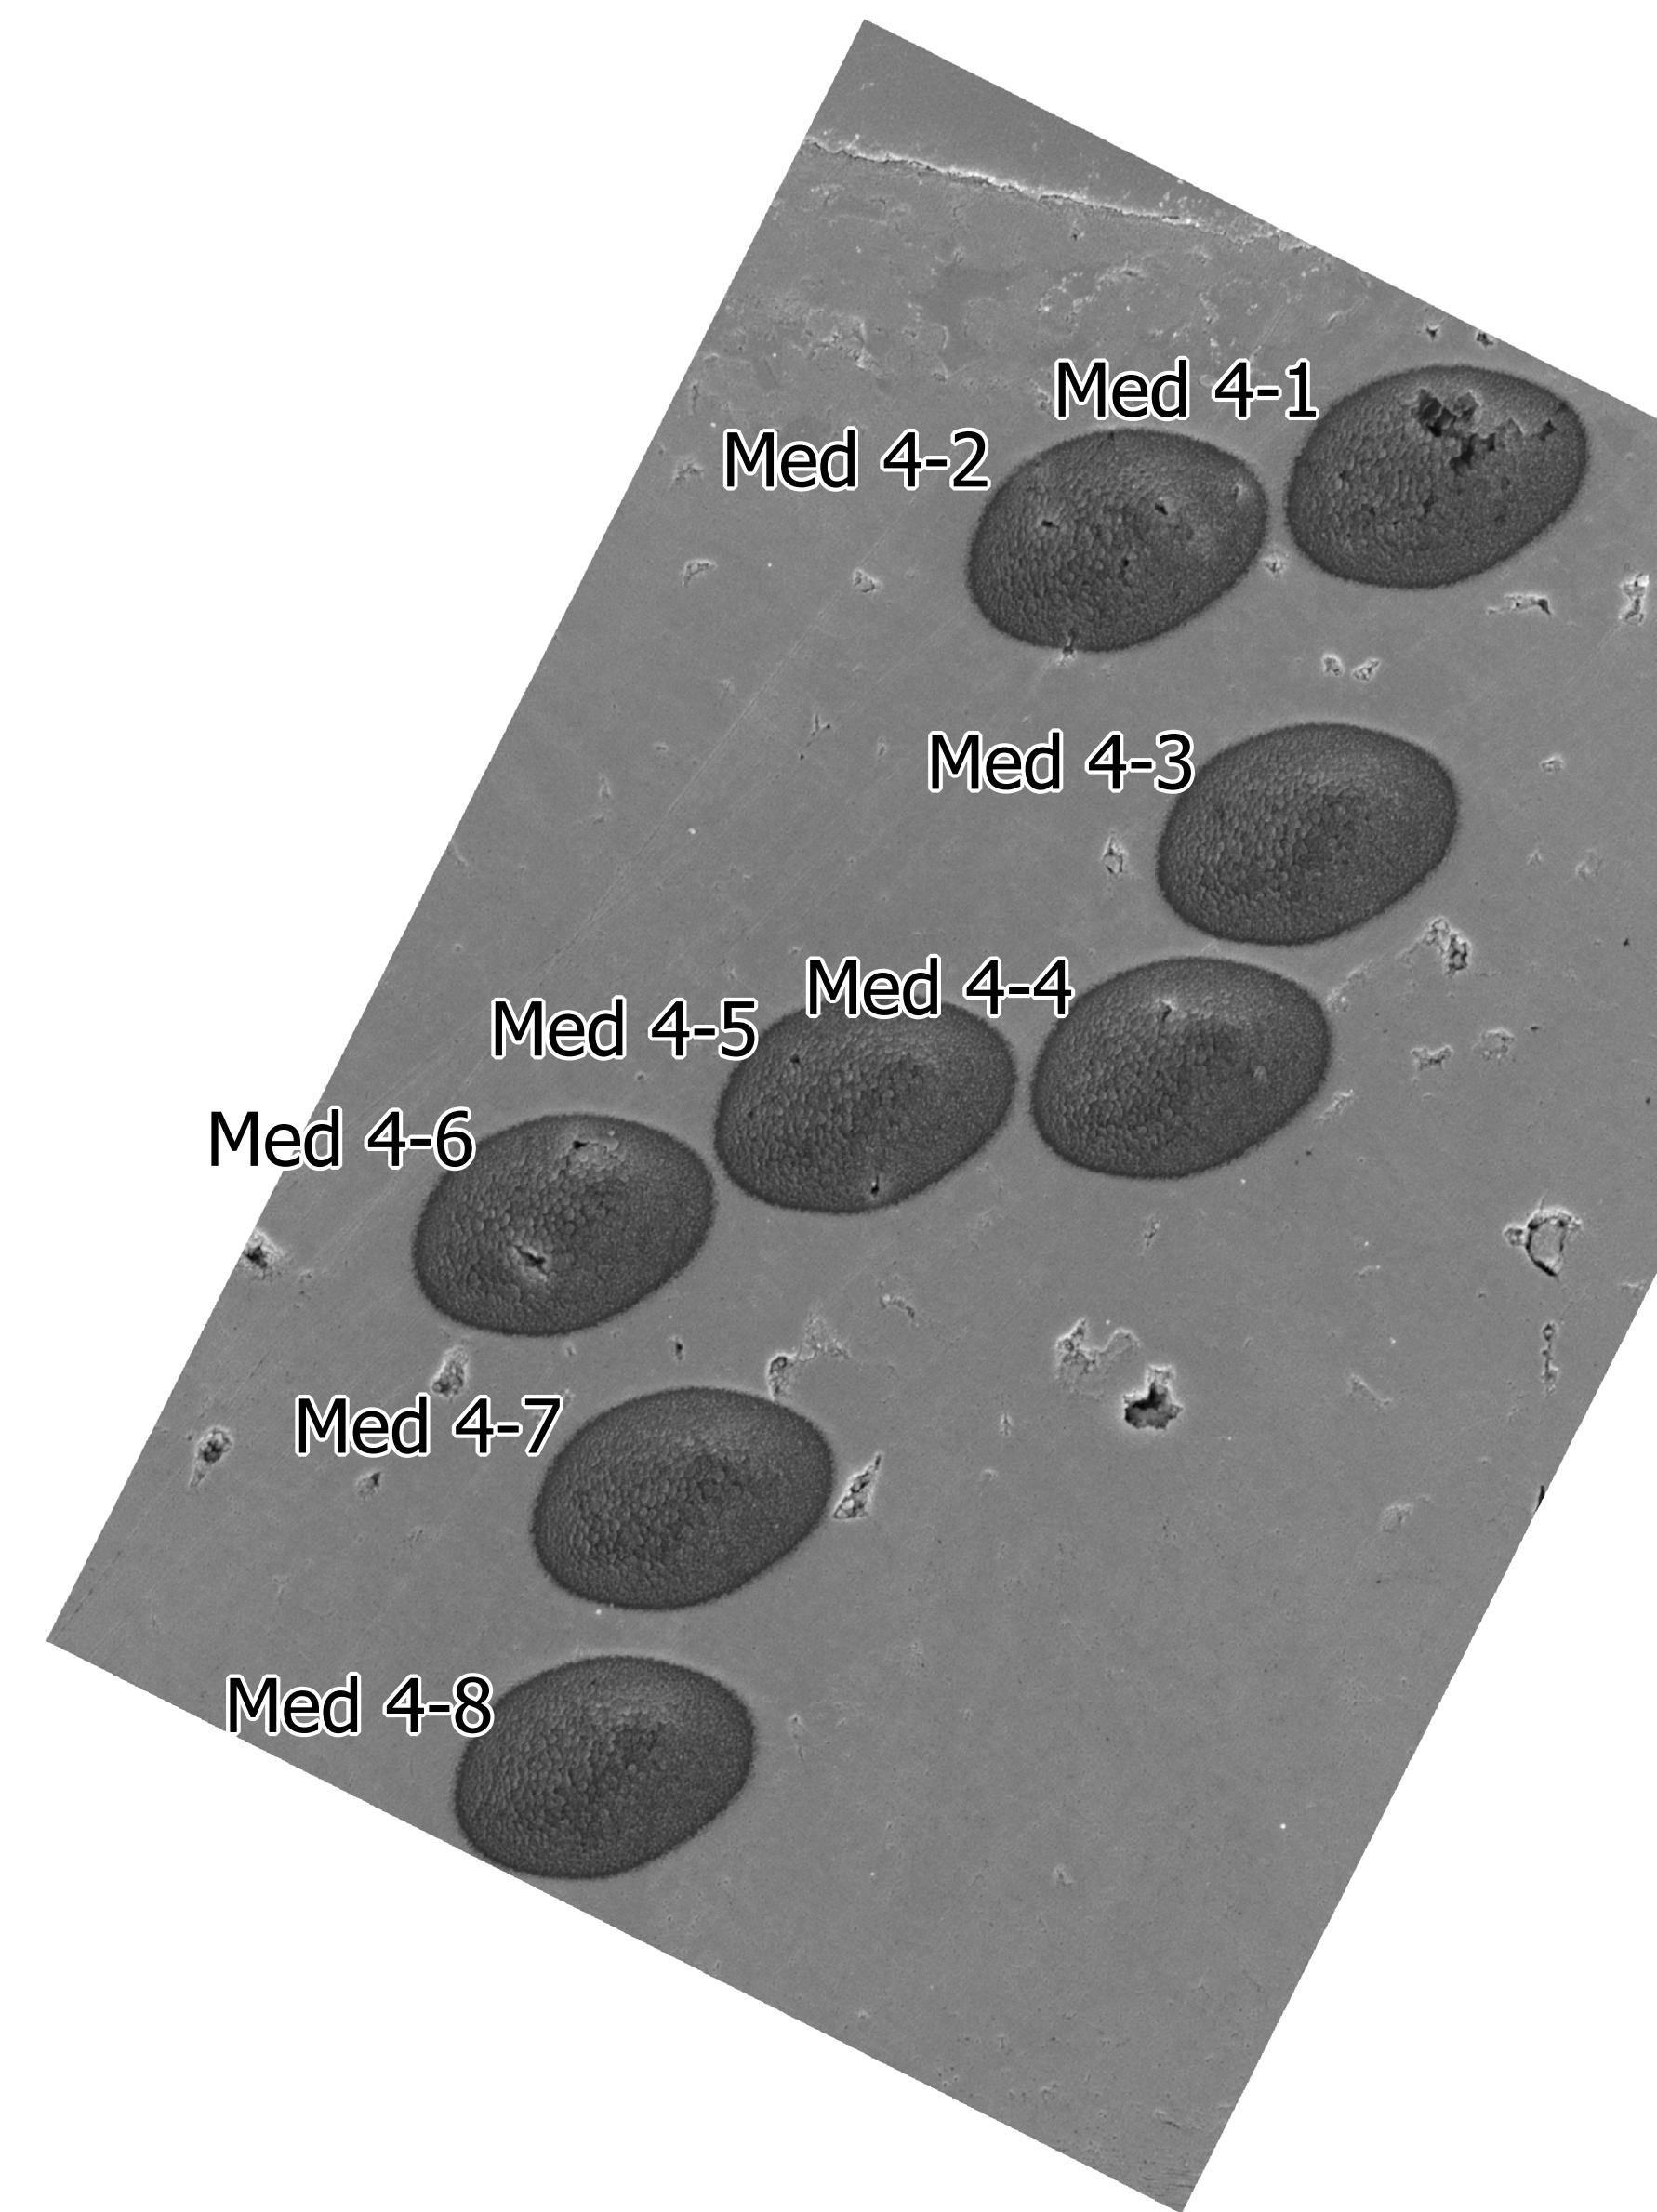

Supplement: S2 Fig — (PDF) [file pone.0153890.s002.pdf]
